# Supplementary material
Source: publisher site journal article supplement (https://www.dovepress.com/article/supplementary_file/587712/587712%20Revised%20Supplementary_Material.xlsx)
Supplement: Supplementary file 1 [file 587712%20Revised%20Supplementary_Material.xlsx]

## Sheet: Sheet1
Supplementary Table S1
The 334 identified DEGs (222 upregulated and 112 downregulated) in RA synovial macrophages compared to control
Genes	logFC	AveExpr	t	P.Value	adj.P.Val	B	change
CRIP1	5.10869	13.3434	35.5308	7.76e-15	1.62e-10	23.34	UP
FUCA1	-4.84008	13.3105	-29.3337	1.03e-13	9.24e-10	21.2999	DOWN
DUSP1	4.19087	13.7474	28.2433	1.71e-13	9.24e-10	20.8752	UP
SERPINA1	3.75908	13.9916	28.1608	1.77e-13	9.24e-10	20.8421	UP
ADGRE5	3.73145	12.9209	26.6006	3.81e-13	1.45e-09	20.1905	UP
PITHD1	-3.29763	12.5058	-26.4187	4.18e-13	1.45e-09	20.1111	DOWN
RBP1	-4.55229	7.93199	-23.5701	1.92e-12	4.83e-09	18.7662	DOWN
EPAS1	-3.97558	11.2662	-23.4267	2.08e-12	4.83e-09	18.693	DOWN
CDKN2D	4.22456	9.23367	23.0688	2.55e-12	4.83e-09	18.5078	UP
RHOB	3.7771	12.7007	22.35	3.89e-12	6.31e-09	18.1248	UP
MYOF	4.17678	12.2588	22.3283	3.94e-12	6.31e-09	18.1131	UP
KLF4	4.63499	13.5714	22.0593	4.63e-12	6.89e-09	17.9656	UP
FOS	3.91748	13.273	21.7175	5.7e-12	7.42e-09	17.775	UP
KLHDC8B	-3.80974	11.0646	-21.0248	8.76e-12	1.07e-08	17.3774	DOWN
FCGR1BP	4.48898	13.0548	20.9242	9.33e-12	1.08e-08	17.3184	UP
MYO1G	4.07452	11.8005	20.8451	9.81e-12	1.08e-08	17.2717	UP
NQO1	-4.87408	9.28382	-20.6907	1.08e-11	1.13e-08	17.18	DOWN
HIVEP3	3.43784	10.1939	20.4604	1.26e-11	1.19e-08	17.0417	UP
NRGN	3.58391	10.0172	20.2337	1.46e-11	1.32e-08	16.9037	UP
SLC40A1	-3.94187	10.8375	-19.9905	1.71e-11	1.48e-08	16.7537	DOWN
S100A8	5.14757	14.4138	19.9154	1.79e-11	1.48e-08	16.7069	UP
SLC8A1	3.82191	11.1484	19.8677	1.85e-11	1.48e-08	16.6771	UP
GAPLINC	-3.41688	7.41467	-19.7394	2.02e-11	1.54e-08	16.5965	DOWN
CCR2	6.7291	11.1628	19.7028	2.07e-11	1.54e-08	16.5734	UP
CX3CR1	7.53784	10.3938	19.0587	3.21e-11	2.25e-08	16.1584	UP
IL27RA	3.02129	11.9573	18.918	3.53e-11	2.37e-08	16.0657	UP
BATF3	5.32278	8.14069	18.774	3.91e-11	2.47e-08	15.9699	UP
JUNB	3.33971	11.952	18.642	4.29e-11	2.63e-08	15.8813	UP
ATP6V0D2	-5.41452	9.61578	-18.5411	4.61e-11	2.74e-08	15.8132	DOWN
FAM20A	5.21912	9.7183	18.2277	5.76e-11	3.33e-08	15.5988	UP
TMEM154	3.39068	9.15054	18.1771	5.98e-11	3.36e-08	15.5638	UP
PLD3	-3.2999	12.4067	-17.9877	6.86e-11	3.76e-08	15.4318	DOWN
HSD17B14	-3.20977	9.47084	-17.8963	7.33e-11	3.91e-08	15.3675	DOWN
FBLIM1	-3.93866	8.57898	-17.768	8.06e-11	4.05e-08	15.2767	DOWN
FYN	3.70496	11.4318	17.7212	8.34e-11	4.05e-08	15.2434	UP
SPATA7	-3.71471	8.28267	-17.7015	8.46e-11	4.05e-08	15.2294	DOWN
SCO2	3.38249	12.5284	17.6849	8.57e-11	4.05e-08	15.2175	UP
PRXL2B	-3.13814	9.96256	-17.6108	9.05e-11	4.19e-08	15.1645	DOWN
ALOX5	4.09535	13.4615	17.5775	9.28e-11	4.2e-08	15.1405	UP
SGMS2	3.3138	11.9873	17.3856	1.07e-10	4.75e-08	15.0017	UP
CDCA7L	-3.15092	9.50362	-17.0836	1.35e-10	5.61e-08	14.7797	DOWN
ARMH1	6.66828	7.40899	16.9289	1.52e-10	6.02e-08	14.6644	UP
KLF2	3.53641	12.7645	16.9288	1.52e-10	6.02e-08	14.6643	UP
AREG	4.3689	8.6521	16.7791	1.7e-10	6.48e-08	14.5516	UP
PNP	3.62005	11.5435	16.7653	1.72e-10	6.48e-08	14.5412	UP
JAK3	3.14992	10.4076	16.7002	1.81e-10	6.57e-08	14.4917	UP
SLC39A8	3.89442	13.0278	16.6874	1.83e-10	6.57e-08	14.482	UP
IL2RG	3.13681	10.2938	16.5497	2.04e-10	7.07e-08	14.3767	UP
CLEC5A	6.29808	11.5525	16.4625	2.18e-10	7.22e-08	14.3096	UP
KCNJ5	-6.17213	9.33397	-16.4612	2.19e-10	7.22e-08	14.3086	DOWN
SH3PXD2A	-3.446	9.0632	-16.4098	2.28e-10	7.41e-08	14.2688	DOWN
MGAM	6.16844	5.83154	16.377	2.34e-10	7.49e-08	14.2433	UP
ATP8A1	-3.11485	10.0151	-16.3333	2.42e-10	7.54e-08	14.2093	DOWN
SLC5A3	-3.27005	11.4385	-16.2303	2.63e-10	7.93e-08	14.1288	DOWN
SLC18B1	-4.74233	10.9334	-16.0361	3.07e-10	9.01e-08	13.9756	DOWN
FPR2	4.92765	10.1798	15.9632	3.26e-10	9.43e-08	13.9176	UP
FN1	5.73937	13.9051	15.6625	4.17e-10	1.14e-07	13.6752	UP
CD163L1	-4.38153	9.07461	-15.3715	5.32e-10	1.35e-07	13.4359	DOWN
SELENOP	-6.33957	12.0162	-15.0857	6.78e-10	1.68e-07	13.1964	DOWN
DPYSL3	3.43442	8.26611	15.0548	6.96e-10	1.71e-07	13.1702	UP
SOCS3	5.09357	11.4162	15.0065	7.25e-10	1.76e-07	13.1292	UP
RNASE3	4.02333	7.17957	14.8456	8.34e-10	1.93e-07	12.9915	UP
GDF15	-4.59221	8.94407	-14.7295	9.22e-10	2.07e-07	12.8912	DOWN
S100A12	6.25516	10.7981	14.5909	1.04e-09	2.23e-07	12.7703	UP
SLCO4A1	4.8129	9.43355	14.5897	1.04e-09	2.23e-07	12.7694	UP
RAB42	-3.00164	11.892	-14.5818	1.05e-09	2.23e-07	12.7624	DOWN
SERPINB9	4.08218	11.5407	14.5698	1.06e-09	2.23e-07	12.7519	UP
LINC01857	-4.82456	9.8861	-14.4855	1.14e-09	2.23e-07	12.6777	DOWN
LACC1	-3.18248	12.1606	-14.4657	1.16e-09	2.23e-07	12.6603	DOWN
SLC43A2	3.0508	11.3514	14.4561	1.17e-09	2.23e-07	12.6518	UP
RARRES1	-6.43692	9.65152	-14.3419	1.3e-09	2.44e-07	12.5505	DOWN
VCAN	4.54486	13.801	14.033	1.72e-09	2.98e-07	12.2721	UP
GCH1	4.231	11.8469	13.9564	1.84e-09	3.12e-07	12.2022	UP
IGF1	-5.48556	8.69537	-13.8038	2.12e-09	3.48e-07	12.0617	DOWN
RFX2	3.82047	9.14469	13.6994	2.34e-09	3.7e-07	11.9646	UP
RPS6KA2	-3.15555	10.5854	-13.6812	2.38e-09	3.7e-07	11.9477	DOWN
HTR2B	-7.68424	6.30869	-13.6238	2.51e-09	3.84e-07	11.894	DOWN
SIGLEC15	-3.51625	9.24433	-13.581	2.61e-09	3.88e-07	11.8538	DOWN
TMEM37	-3.89185	9.91011	-13.2851	3.46e-09	4.74e-07	11.5725	DOWN
HSH2D	4.45041	6.60891	13.2565	3.55e-09	4.76e-07	11.5449	UP
KLHL13	-3.68603	6.3581	-13.1994	3.75e-09	4.95e-07	11.4899	DOWN
CTSF	-3.22315	8.20192	-13.1601	3.9e-09	5.1e-07	11.4518	DOWN
S1PR4	4.35439	8.52475	13.1061	4.11e-09	5.25e-07	11.3993	UP
TREM1	6.98018	11.2916	13.0617	4.29e-09	5.44e-07	11.3561	UP
TRIM32	-3.24185	8.70717	-13.0314	4.42e-09	5.51e-07	11.3264	DOWN
IL1R2	4.85434	11.2107	12.9999	4.55e-09	5.65e-07	11.2955	UP
LMNB1	3.00868	10.8351	12.958	4.75e-09	5.81e-07	11.2543	UP
ANKRD22	6.95843	10.442	12.9074	4.99e-09	6.03e-07	11.2044	UP
LINC02381	3.75183	8.01943	12.8562	5.24e-09	6.2e-07	11.1538	UP
ARMC9	-6.61554	7.50239	-12.8428	5.31e-09	6.25e-07	11.1404	DOWN
FPR1	5.71894	13.4324	12.8271	5.4e-09	6.31e-07	11.1249	UP
BEX3	-3.17266	10.9899	-12.7652	5.74e-09	6.53e-07	11.0631	DOWN
CRIP2	5.81188	8.24292	12.6575	6.39e-09	7e-07	10.9552	UP
LINC01614	4.6824	6.3699	12.6572	6.39e-09	7e-07	10.9549	UP
IQCK	-3.13419	8.26924	-12.6365	6.52e-09	7.07e-07	10.934	DOWN
MCEMP1	4.75391	11.6938	12.6011	6.76e-09	7.25e-07	10.8983	UP
ASRGL1	-3.3801	10.727	-12.5844	6.87e-09	7.34e-07	10.8814	DOWN
NR4A2	4.01903	8.40239	12.5404	7.18e-09	7.47e-07	10.8368	UP
RNASE2	3.61514	11.5384	12.4756	7.67e-09	7.9e-07	10.7709	UP
CLU	4.54495	6.88422	12.2197	9.95e-09	9.76e-07	10.5072	UP
FBP1	3.20136	13.6813	12.2142	1e-08	9.76e-07	10.5015	UP
PRKAR2B	3.66019	9.8829	12.2116	1e-08	9.76e-07	10.4988	UP
F5	5.85004	8.38802	12.1872	1.03e-08	9.97e-07	10.4734	UP
ALOX5AP	4.08946	12.7104	12.1074	1.12e-08	1.06e-06	10.3899	UP
HS3ST2	-6.38532	9.6545	-12.0933	1.13e-08	1.07e-06	10.3751	DOWN
GBP2	3.39358	11.4851	12.0843	1.14e-08	1.07e-06	10.3656	UP
S1PR3	5.67073	7.91904	12.0674	1.16e-08	1.07e-06	10.3479	UP
NEDD9	4.4981	9.76491	12.0585	1.18e-08	1.08e-06	10.3385	UP
LILRA3	5.25611	11.0938	11.9766	1.28e-08	1.15e-06	10.252	UP
SERPINB2	-8.1329	9.40808	-11.8738	1.43e-08	1.24e-06	10.1426	DOWN
C15orf48	4.33876	13.2831	11.7015	1.71e-08	1.43e-06	9.95732	UP
CD69	7.51633	8.71183	11.6899	1.73e-08	1.44e-06	9.94473	UP
ICAM3	3.8077	10.3796	11.6345	1.84e-08	1.51e-06	9.88457	UP
STEAP4	4.98212	8.54619	11.5387	2.04e-08	1.63e-06	9.77993	UP
GALNT14	-4.7448	7.54233	-11.5349	2.05e-08	1.63e-06	9.77584	DOWN
ITGB2-AS1	3.37793	10.4933	11.3869	2.4e-08	1.85e-06	9.61258	UP
ATP8B2	5.55202	8.82251	11.2562	2.77e-08	2.09e-06	9.46686	UP
OLR1	4.59507	12.8708	11.19	2.98e-08	2.2e-06	9.39241	UP
PKD2L1	-3.44846	9.30304	-11.1573	3.09e-08	2.25e-06	9.35552	DOWN
AQP9	4.13196	12.4139	11.1113	3.26e-08	2.33e-06	9.3035	UP
ENPP2	4.58496	10.3236	10.9014	4.12e-08	2.72e-06	9.06349	UP
CRHBP	-6.14009	6.92222	-10.885	4.2e-08	2.77e-06	9.0446	DOWN
CETP	-4.17708	4.33785	-10.8542	4.35e-08	2.82e-06	9.00898	DOWN
EPHX1	-4.84876	7.97284	-10.8206	4.52e-08	2.88e-06	8.97011	DOWN
COL23A1	-3.74827	7.90351	-10.81	4.57e-08	2.89e-06	8.95781	DOWN
SRPX	-5.16038	6.84462	-10.7824	4.72e-08	2.95e-06	8.92566	DOWN
GBP1	4.38558	12.5981	10.7451	4.92e-08	3.01e-06	8.88222	UP
RPH3AL-AS1	-5.82662	7.05833	-10.6868	5.26e-08	3.16e-06	8.81393	DOWN
PLPP3	-3.6795	11.3232	-10.6276	5.63e-08	3.32e-06	8.74439	DOWN
HSF4	-3.22729	5.93859	-10.6074	5.77e-08	3.34e-06	8.72052	DOWN
SIGLEC10	6.76192	9.6367	10.5971	5.83e-08	3.37e-06	8.7084	UP
ENHO	4.40119	7.89047	10.5802	5.95e-08	3.41e-06	8.68846	UP
MUC1	5.3684	8.00191	10.5294	6.31e-08	3.56e-06	8.62816	UP
MARCKSL1	4.32527	11.0366	10.473	6.74e-08	3.74e-06	8.56106	UP
MTMR11	3.75441	8.93725	10.4468	6.95e-08	3.83e-06	8.52979	UP
MTHFD1L	3.05894	9.84248	10.4179	7.19e-08	3.93e-06	8.49513	UP
CYP27A1	-3.86611	12.1612	-10.3837	7.48e-08	4.05e-06	8.45413	DOWN
DUSP5	3.07666	9.29184	10.3763	7.55e-08	4.06e-06	8.44524	UP
ECE1	3.89064	8.65088	10.3284	7.99e-08	4.25e-06	8.38748	UP
FCMR	-3.4989	9.62348	-10.3221	8.05e-08	4.27e-06	8.37987	DOWN
LINC01127	4.73144	6.4527	10.2816	8.44e-08	4.43e-06	8.33087	UP
SLC2A3	3.81134	13.1082	10.2454	8.81e-08	4.54e-06	8.28698	UP
CST6	3.17252	9.33085	10.2351	8.92e-08	4.56e-06	8.27435	UP
CLEC4D	3.68609	9.11357	10.1205	1.02e-07	5.07e-06	8.13435	UP
PFKP	3.01048	11.7847	10.1155	1.03e-07	5.09e-06	8.12823	UP
FOSB	4.97352	8.88138	10.0503	1.11e-07	5.42e-06	8.04788	UP
FCAR	3.79375	9.03133	10.0036	1.18e-07	5.66e-06	7.99008	UP
CD1E	5.75831	7.77524	9.96518	1.23e-07	5.88e-06	7.94234	UP
PPP1R14A	4.38394	5.46723	9.7779	1.55e-07	6.94e-06	7.70756	UP
SBNO2	3.23838	8.5742	9.62344	1.88e-07	8.08e-06	7.51115	UP
EGR3	4.25857	9.43351	9.51908	2.14e-07	8.84e-06	7.37701	UP
ALDH1A1	-4.29966	11.5329	-9.49913	2.19e-07	9.01e-06	7.35124	DOWN
HMGN2P46	3.24751	7.39467	9.46572	2.29e-07	9.31e-06	7.30797	UP
TMEM52B	3.29065	9.51847	9.41933	2.43e-07	9.74e-06	7.2477	UP
CLEC4E	3.43877	11.398	9.36414	2.6e-07	1.02e-05	7.17569	UP
BMAL2	3.78077	7.44214	9.35934	2.62e-07	1.03e-05	7.1694	UP
FLT1	4.9162	8.70111	9.31738	2.76e-07	1.07e-05	7.1144	UP
P2RY14	5.42136	8.27189	9.27968	2.9e-07	1.11e-05	7.06482	UP
PDLIM1	3.5755	10.5696	9.27343	2.92e-07	1.12e-05	7.05658	UP
IL1RAP	3.2324	9.61714	9.24393	3.04e-07	1.15e-05	7.01766	UP
ALK	-4.39043	7.35088	-9.2086	3.18e-07	1.2e-05	6.97092	DOWN
PIR	-3.93335	8.98456	-9.18756	3.26e-07	1.22e-05	6.94301	DOWN
ADRB1	4.98096	7.81022	9.13668	3.49e-07	1.29e-05	6.87532	UP
CD2	3.61062	9.61974	9.02414	4.04e-07	1.45e-05	6.72456	UP
GBP5	6.81024	9.20534	8.96672	4.35e-07	1.53e-05	6.64708	UP
RIPOR2	4.55788	9.78236	8.90374	4.73e-07	1.63e-05	6.56166	UP
TIMD4	4.57614	7.94446	8.87732	4.9e-07	1.68e-05	6.52569	UP
ZNF704	-6.29222	7.10179	-8.87507	4.91e-07	1.68e-05	6.52262	DOWN
PHLDA2	3.07165	9.95613	8.84972	5.08e-07	1.7e-05	6.48803	UP
AQP3	4.16651	9.01583	8.71436	6.08e-07	1.95e-05	6.30203	UP
ADAM19	4.88119	8.06334	8.68516	6.33e-07	2e-05	6.26164	UP
CCND2	3.66831	10.2127	8.65663	6.57e-07	2.06e-05	6.22206	UP
IL3RA	6.67285	8.57576	8.62751	6.84e-07	2.13e-05	6.18155	UP
OASL	3.29401	10.4452	8.6116	6.99e-07	2.17e-05	6.15939	UP
PLAC8	3.84558	11.0535	8.59441	7.15e-07	2.2e-05	6.13541	UP
HPGD	3.59133	6.95897	8.54669	7.63e-07	2.31e-05	6.06864	UP
PLEKHA7	3.38175	6.94672	8.51695	7.94e-07	2.39e-05	6.02689	UP
ERMN	3.32291	5.88193	8.44318	8.79e-07	2.62e-05	5.92287	UP
DEFB1	7.1461	8.72711	8.41731	9.11e-07	2.7e-05	5.88624	UP
FABP4	-7.07524	8.68408	-8.36899	9.73e-07	2.84e-05	5.81758	DOWN
TEDC1	4.04223	7.39102	8.34974	9.99e-07	2.88e-05	5.79015	UP
CD1B	4.50957	6.80172	8.33099	1.03e-06	2.94e-05	5.7634	UP
RASGRP3	-3.12085	10.2754	-8.2607	1.13e-06	3.14e-05	5.6627	DOWN
DKK2	4.67699	5.06185	8.25976	1.13e-06	3.14e-05	5.66136	UP
EGR1	3.78425	12.0906	8.23348	1.17e-06	3.22e-05	5.62355	UP
IQCD	-3.16648	6.24629	-8.23131	1.18e-06	3.22e-05	5.62042	DOWN
CXCL9	5.08275	10.8413	8.20372	1.22e-06	3.3e-05	5.58062	UP
CTSK	-3.2121	10.9051	-8.20017	1.23e-06	3.3e-05	5.57549	DOWN
RNA45SN5	-4.10473	10.2133	-8.19739	1.24e-06	3.31e-05	5.57149	DOWN
CXCL11	5.8929	8.72946	8.19529	1.24e-06	3.31e-05	5.56845	UP
DPP4	-3.08855	8.62864	-8.17719	1.27e-06	3.37e-05	5.54227	DOWN
SLC47A1	-5.01388	7.89853	-8.15914	1.3e-06	3.45e-05	5.51612	DOWN
RGS1	4.49164	12.3021	8.1205	1.38e-06	3.58e-05	5.46002	UP
LILRA5	3.05983	11.6445	8.11889	1.38e-06	3.59e-05	5.45769	UP
KITLG	-6.61832	8.05297	-7.95002	1.75e-06	4.33e-05	5.21024	DOWN
PROCR	4.19914	7.99565	7.93021	1.8e-06	4.44e-05	5.18097	UP
PLA2G7	-3.00888	13.7404	-7.89836	1.89e-06	4.6e-05	5.13382	DOWN
APOL4	5.22958	7.21703	7.88327	1.93e-06	4.65e-05	5.11143	UP
TOX-DT	3.11858	5.41264	7.87986	1.94e-06	4.66e-05	5.10638	UP
RTN4R	-4.20583	6.79301	-7.81277	2.14e-06	5.02e-05	5.00646	DOWN
TNIP3	3.58413	5.90314	7.80872	2.15e-06	5.04e-05	5.0004	UP
COBLL1	-4.93646	7.62602	-7.78775	2.21e-06	5.14e-05	4.96905	DOWN
CLEC12B	4.83263	6.16764	7.74154	2.37e-06	5.44e-05	4.89974	UP
AKR1C3	-3.15716	9.05085	-7.73968	2.37e-06	5.44e-05	4.89694	DOWN
CMTM8	-3.61403	7.81993	-7.7394	2.38e-06	5.44e-05	4.89653	DOWN
P3H4	-3.36065	3.85014	-7.68152	2.59e-06	5.8e-05	4.8093	DOWN
VAMP5	3.53423	11.1031	7.65868	2.67e-06	5.95e-05	4.77477	UP
NDRG2	3.62526	8.41885	7.6532	2.69e-06	5.98e-05	4.76648	UP
NINL	-4.17062	6.90394	-7.64443	2.73e-06	6.04e-05	4.75319	DOWN
ACAP1	4.08011	7.76142	7.61497	2.85e-06	6.23e-05	4.70849	UP
IL31RA	4.7704	7.56014	7.60069	2.91e-06	6.31e-05	4.68678	UP
IL21R	3.43216	7.80192	7.50745	3.34e-06	7.01e-05	4.54437	UP
IL32	5.05257	6.40847	7.5046	3.36e-06	7.01e-05	4.54	UP
PALD1	3.82725	8.12447	7.49315	3.41e-06	7.11e-05	4.52244	UP
KCNJ15	5.48938	8.61335	7.4361	3.72e-06	7.54e-05	4.43463	UP
IFITM1	4.02539	11.7349	7.41349	3.84e-06	7.76e-05	4.3997	UP
PNPLA3	-4.47953	5.51304	-7.41271	3.85e-06	7.76e-05	4.39849	DOWN
DLL1	-3.5609	6.86167	-7.36415	4.14e-06	8.22e-05	4.32326	DOWN
RETN	4.86327	8.67493	7.32797	4.37e-06	8.58e-05	4.267	UP
CXCL13	8.65609	8.87455	7.28848	4.64e-06	8.99e-05	4.2054	UP
PDCD1LG2	4.42324	5.7056	7.23923	5e-06	9.52e-05	4.12827	UP
GATM	-3.07626	10.7275	-7.23889	5e-06	9.52e-05	4.12774	DOWN
FCGR1A	3.16945	5.94992	7.07903	6.39e-06	0.000115826	3.87514	UP
PPP1R16B	3.25776	7.30716	7.04073	6.77e-06	0.000121813	3.81411	UP
MACC1-DT	3.27781	6.71013	6.97959	7.45e-06	0.000132313	3.71626	UP
LGR4	-3.64578	6.00937	-6.97643	7.48e-06	0.000132851	3.71118	DOWN
OR52K3P	4.08338	6.72976	6.96906	7.57e-06	0.000134267	3.69935	UP
TFPI	-3.28375	8.29315	-6.93983	7.92e-06	0.000139291	3.65235	DOWN
DCHS1	3.62506	7.61803	6.92261	8.14e-06	0.000141449	3.6246	UP
FARP1	-3.6205	7.50369	-6.91737	8.2e-06	0.000142134	3.61616	DOWN
CRISPLD2	3.51942	9.74132	6.88234	8.67e-06	0.000148044	3.55956	UP
GPRC5B	-5.14486	6.75612	-6.85355	9.07e-06	0.000153587	3.51292	DOWN
MAP3K7CL	3.67309	8.87937	6.83382	9.35e-06	0.00015774	3.4809	UP
WNT5A	-3.29775	7.34857	-6.8336	9.36e-06	0.00015774	3.48054	DOWN
ITGA7	4.09022	8.21698	6.81641	9.61e-06	0.000160504	3.4526	UP
LAMP3	5.19841	8.09708	6.80649	9.76e-06	0.000162381	3.43645	UP
PDK4	-3.63151	10.9252	-6.79874	9.88e-06	0.000163854	3.42383	DOWN
CACNA2D3	-3.05513	9.30485	-6.7535	1.06e-05	0.000174329	3.34998	DOWN
HCAR3	3.46395	9.78136	6.72933	1.1e-05	0.000180062	3.31041	UP
SLC7A11	-5.06685	9.82153	-6.72384	1.11e-05	0.000180869	3.30139	DOWN
S100B	4.51141	5.84167	6.71617	1.13e-05	0.000181806	3.28882	UP
ACKR3	5.06151	8.75002	6.70949	1.14e-05	0.000183318	3.27786	UP
FOLR2	-3.28036	11.5449	-6.66793	1.22e-05	0.000193168	3.20951	DOWN
CSPG4	3.66983	6.03115	6.63064	1.29e-05	0.000202247	3.14797	UP
PLAAT4	3.41828	10.9244	6.62167	1.31e-05	0.000204248	3.13315	UP
CNRIP1	-3.90499	9.04468	-6.62113	1.31e-05	0.000204271	3.13226	DOWN
PCSK6	-4.22559	6.73299	-6.59766	1.36e-05	0.000210216	3.09339	DOWN
ITGB7	4.02945	9.03159	6.59518	1.37e-05	0.000210896	3.08929	UP
TNFAIP6	3.62871	9.12566	6.56399	1.44e-05	0.000218975	3.03752	UP
ITPR1-DT	-3.20845	6.19533	-6.52965	1.52e-05	0.000228091	2.98038	DOWN
SLC16A10	5.53279	9.29926	6.522	1.54e-05	0.000230268	2.96762	UP
CALHM6	4.3497	12.0097	6.51526	1.55e-05	0.000232376	2.95637	UP
GRIP1	-3.8716	4.74581	-6.43248	1.78e-05	0.000256082	2.81777	DOWN
RASGEF1A	3.6066	8.11597	6.41931	1.82e-05	0.000260742	2.79563	UP
NFE2	3.23797	7.88454	6.32599	2.11e-05	0.000293388	2.63807	UP
NRG1	5.29283	7.2112	6.30573	2.19e-05	0.000301722	2.6037	UP
CXCL10	5.91853	11.2874	6.28485	2.26e-05	0.000309186	2.56822	UP
HLA-DOB	3.40516	7.20517	6.18452	2.67e-05	0.000351174	2.3969	UP
P2RY12	5.982	6.86077	6.16251	2.77e-05	0.000361295	2.35914	UP
CD22	-3.20821	8.49729	-6.13244	2.91e-05	0.000376557	2.30743	DOWN
S100P	4.32914	8.50928	6.05037	3.34e-05	0.00041775	2.16567	UP
LPAR5	3.01859	9.14291	6.01892	3.52e-05	0.000434965	2.11108	UP
TMEM255A	-5.50142	8.96077	-6.00422	3.61e-05	0.000444552	2.08553	DOWN
C11orf96	3.47383	4.49476	5.93432	4.07e-05	0.000485967	1.96361	UP
APOC1	-3.69143	13.6144	-5.91093	4.23e-05	0.000504208	1.92266	DOWN
JAKMIP2	-3.14869	10.4782	-5.89543	4.34e-05	0.000514133	1.89549	DOWN
ITM2A	3.77697	8.22384	5.86727	4.56e-05	0.000532045	1.84603	UP
GBP4	3.82378	8.71651	5.82588	4.89e-05	0.000562913	1.77313	UP
IL1RN	3.46496	12.5024	5.82469	4.9e-05	0.000563643	1.77104	UP
CD72	3.68845	8.59788	5.82447	4.9e-05	0.000563643	1.77066	UP
IL18R1	3.49179	5.59291	5.80253	5.09e-05	0.000579786	1.73192	UP
APOE	-3.93469	12.8749	-5.70223	6.05e-05	0.000666069	1.55402	DOWN
SPAG1	3.11195	6.9318	5.69171	6.16e-05	0.000676124	1.53527	UP
CD1C	4.29917	9.83924	5.67651	6.32e-05	0.000690886	1.50816	UP
SYNC	3.1613	7.35516	5.57735	7.51e-05	0.000791399	1.33061	UP
MGC12916	3.29192	6.82218	5.54035	8.02e-05	0.000830822	1.26402	UP
CTTNBP2	-4.63654	5.67982	-5.50451	8.54e-05	0.000872108	1.19935	DOWN
EGLN3	4.25103	6.93826	5.48343	8.86e-05	0.000895352	1.16122	UP
CCL13	3.33551	7.92752	5.3299	0.000116206	0.00110395	0.881877	UP
SCARNA2	-4.21334	5.43721	-5.27056	0.000129176	0.0011998	0.773098	DOWN
PLOD2	3.17663	7.37217	5.26209	0.000131147	0.00121594	0.757532	UP
PPBP	-5.43573	6.35948	-5.23048	0.000138784	0.00127223	0.69937	DOWN
SULT1C2	-3.5589	6.18157	-5.22239	0.000140812	0.00128552	0.684467	DOWN
GBP1P1	4.91073	6.18193	5.19672	0.000147453	0.00133156	0.63712	UP
MMP12	5.28213	7.97447	5.12898	0.000166594	0.00146607	0.51178	UP
CASP5	3.11125	7.56981	5.12017	0.000169266	0.00148475	0.495441	UP
HSD11B1	3.10211	8.46495	5.09938	0.000175751	0.00152939	0.456848	UP
GZMA	3.19417	8.72184	5.09565	0.000176942	0.00153591	0.449912	UP
TNFRSF10C	3.08814	6.27708	5.04109	0.000195351	0.00165973	0.348343	UP
RSAD2	3.63703	10.3292	5.02048	0.000202814	0.00171196	0.309883	UP
NEXN	3.64118	7.22273	5.00158	0.000209919	0.00175556	0.274568	UP
PRR16	4.09928	5.74899	4.95239	0.000229646	0.00187665	0.182469	UP
CLEC12A	3.04922	10.439	4.93356	0.0002377	0.00192752	0.147134	UP
NDC80	3.11057	5.56898	4.93189	0.000238426	0.00192965	0.144008	UP
ADGRG1	3.95166	6.39427	4.88582	0.000259454	0.00206374	0.0573944	UP
ALDH5A1	-4.71204	4.2396	-4.84312	0.000280669	0.00219476	-0.0231088	DOWN
RILPL1	-3.47091	7.0556	-4.82989	0.000287596	0.00223466	-0.0480769	DOWN
INHBA	5.35519	6.74264	4.81789	0.000294037	0.00227706	-0.0707538	UP
CYTL1	-3.4856	5.57699	-4.7956	0.000306397	0.00234488	-0.112907	DOWN
AIM2	4.09561	8.01295	4.76186	0.000326141	0.00245715	-0.176815	UP
ANXA3	3.65991	5.57179	4.74184	0.000338476	0.00253496	-0.214796	UP
THEMIS	3.05151	5.82338	4.72708	0.000347881	0.00259002	-0.242833	UP
GZMB	3.34256	8.73206	4.68787	0.000374195	0.0027515	-0.317396	UP
RGS13	3.06906	5.28871	4.68671	0.000375008	0.0027565	-0.319616	UP
NAPSB	3.06521	10.4346	4.65209	0.000400003	0.00289247	-0.38557	UP
CEMIP	3.59814	5.18576	4.65186	0.000400176	0.00289249	-0.386011	UP
SLAMF9	3.16551	8.59369	4.64382	0.000406231	0.00293369	-0.401356	UP
TIMP4	3.23692	5.58446	4.63556	0.000412546	0.0029685	-0.417118	UP
USP30-AS1	3.21385	7.24829	4.58325	0.000454973	0.00321273	-0.517106	UP
H4C1	-3.75054	5.27322	-4.57162	0.000465002	0.00326584	-0.539369	DOWN
ZNF366	-3.84573	7.54627	-4.56814	0.000468046	0.003285	-0.54603	DOWN
EBI3	3.24617	6.05913	4.55205	0.000482404	0.00336648	-0.576875	UP
IFI27	3.81772	10.1835	4.52609	0.000506519	0.00349032	-0.626656	UP
MAJIN	-3.32253	5.02718	-4.52303	0.00050945	0.0035057	-0.632543	DOWN
CNIH3	-3.68485	4.52888	-4.43847	0.000597536	0.00397762	-0.795173	DOWN
NR4A3	3.48614	8.00932	4.43158	0.000605372	0.00401729	-0.808452	UP
LEP	-4.57064	9.149	-4.41196	0.000628266	0.00413235	-0.846274	DOWN
VSTM1	3.91626	5.80117	4.39485	0.000648975	0.00423114	-0.87931	UP
CRYBB1	-3.48739	6.48273	-4.31168	0.000760054	0.00479181	-1.04013	DOWN
PLA1A	3.08252	4.7427	4.30754	0.000766077	0.00482103	-1.04816	UP
CD3D	3.0812	8.81348	4.26379	0.000832722	0.00515795	-1.13299	UP
NR4A1	3.83179	7.91311	4.24004	0.00087138	0.00534638	-1.1791	UP
THBS1	-3.14504	9.95229	-4.21896	0.00090723	0.0054983	-1.22006	DOWN
H4C2	-3.28667	5.4607	-4.20685	0.000928505	0.00559791	-1.24361	DOWN
SPINK1	3.13363	9.17454	4.05327	0.00124728	0.00705989	-1.54294	UP
MUC7	-3.09446	3.35902	-3.86874	0.00178287	0.00938251	-1.90411	DOWN
MMP3	3.42995	7.43227	3.66568	0.00264888	0.012903	-2.30266	UP
PROK2	3.35903	6.88073	3.64429	0.00276203	0.0133202	-2.34465	UP
LINC01010	3.60374	6.67046	3.29111	0.00552447	0.0231286	-3.03686	UP
MMP1	3.08924	5.09195	3.15597	0.00720601	0.0284848	-3.30007	UP
USP9Y	-4.21837	3.3222	-2.61804	0.0206035	0.0648697	-4.3253	DOWN
HMCN1	-3.08412	2.99629	-2.46545	0.0276223	0.0813973	-4.60581	DOWN
IL26	3.2232	3.33876	2.44327	0.0288169	0.0841632	-4.64607	UP
RPS4Y1	-3.86181	7.26541	-2.1687	0.0483145	0.124425	-5.13157	DOWN
Supplementary Table S2
Expression levels of cluster-specific marker genes in macrophage subtypes
Expression levels of cluster-specific marker genes in macrophage subtypes.	P_value	Avg_log2FC	Pct.1	Pct.2	P_val_adj	Cluster
Expression levels of cluster-specific marker genes in macrophage subtypes.	1.19e-46	1.17578	0.935	0.405	2.07e-42	0
Expression levels of cluster-specific marker genes in macrophage subtypes.	5.04e-42	0.70747	0.788	0.198	8.77e-38	0
Expression levels of cluster-specific marker genes in macrophage subtypes.	5.69e-40	0.965626	0.984	0.559	9.9e-36	0
Expression levels of cluster-specific marker genes in macrophage subtypes.	4.58e-39	0.702486	0.603	0.091	7.97e-35	0
Expression levels of cluster-specific marker genes in macrophage subtypes.	2.47e-38	0.832016	0.891	0.379	4.29e-34	0
Expression levels of cluster-specific marker genes in macrophage subtypes.	3.39e-38	0.737382	0.761	0.191	5.9e-34	0
Expression levels of cluster-specific marker genes in macrophage subtypes.	3.73e-38	0.750187	0.837	0.253	6.48e-34	0
Expression levels of cluster-specific marker genes in macrophage subtypes.	7.61e-38	0.646967	0.696	0.146	1.32e-33	0
Expression levels of cluster-specific marker genes in macrophage subtypes.	7.67e-38	1.75042	0.973	0.507	1.33e-33	0
Expression levels of cluster-specific marker genes in macrophage subtypes.	1.18e-37	0.665946	0.891	0.326	2.05e-33	0
Expression levels of cluster-specific marker genes in macrophage subtypes.	2.14e-37	0.526683	0.707	0.175	3.73e-33	0
Expression levels of cluster-specific marker genes in macrophage subtypes.	3.12e-37	1.01631	0.951	0.423	5.43e-33	0
Expression levels of cluster-specific marker genes in macrophage subtypes.	1.1e-36	0.651613	0.864	0.326	1.91e-32	0
Expression levels of cluster-specific marker genes in macrophage subtypes.	1.5e-36	0.906826	0.973	0.491	2.61e-32	0
Expression levels of cluster-specific marker genes in macrophage subtypes.	2.34e-36	0.800732	0.973	0.606	4.07e-32	0
Expression levels of cluster-specific marker genes in macrophage subtypes.	3.26e-36	0.764437	0.864	0.279	5.67e-32	0
Expression levels of cluster-specific marker genes in macrophage subtypes.	7.2e-36	1.2139	0.973	0.439	1.25e-31	0
Expression levels of cluster-specific marker genes in macrophage subtypes.	9.47e-36	0.719146	0.652	0.138	1.65e-31	0
Expression levels of cluster-specific marker genes in macrophage subtypes.	3.11e-35	0.884208	0.859	0.329	5.41e-31	0
Expression levels of cluster-specific marker genes in macrophage subtypes.	9.06e-35	1.0389	0.793	0.227	1.57e-30	0
Expression levels of cluster-specific marker genes in macrophage subtypes.	9.53e-35	0.517607	0.625	0.115	1.66e-30	0
Expression levels of cluster-specific marker genes in macrophage subtypes.	1.07e-34	0.933033	0.995	0.538	1.86e-30	0
Expression levels of cluster-specific marker genes in macrophage subtypes.	2.46e-34	1.20947	0.707	0.17	4.28e-30	0
Expression levels of cluster-specific marker genes in macrophage subtypes.	3.21e-34	0.873716	0.973	0.58	5.57e-30	0
Expression levels of cluster-specific marker genes in macrophage subtypes.	4.37e-34	0.726271	0.576	0.097	7.6e-30	0
Expression levels of cluster-specific marker genes in macrophage subtypes.	4.84e-34	0.707883	0.848	0.337	8.42e-30	0
Expression levels of cluster-specific marker genes in macrophage subtypes.	7.35e-34	0.914112	1	0.757	1.28e-29	0
Expression levels of cluster-specific marker genes in macrophage subtypes.	1.63e-33	1.13972	0.989	0.674	2.83e-29	0
Expression levels of cluster-specific marker genes in macrophage subtypes.	1.63e-33	0.688171	0.69	0.193	2.84e-29	0
Expression levels of cluster-specific marker genes in macrophage subtypes.	2.08e-33	0.690534	0.679	0.183	3.62e-29	0
Expression levels of cluster-specific marker genes in macrophage subtypes.	2.7e-33	0.769583	0.94	0.514	4.7e-29	0
Expression levels of cluster-specific marker genes in macrophage subtypes.	2.88e-33	0.698815	0.913	0.462	5.01e-29	0
Expression levels of cluster-specific marker genes in macrophage subtypes.	3.62e-33	0.831487	0.918	0.491	6.29e-29	0
Expression levels of cluster-specific marker genes in macrophage subtypes.	4.84e-33	0.7601	0.69	0.175	8.42e-29	0
Expression levels of cluster-specific marker genes in macrophage subtypes.	6.98e-33	1.06552	1	0.812	1.21e-28	0
Expression levels of cluster-specific marker genes in macrophage subtypes.	1.06e-32	0.825456	0.984	0.598	1.84e-28	0
Expression levels of cluster-specific marker genes in macrophage subtypes.	1.62e-32	0.625445	0.609	0.128	2.82e-28	0
Expression levels of cluster-specific marker genes in macrophage subtypes.	2.86e-32	0.467648	0.826	0.3	4.97e-28	0
Expression levels of cluster-specific marker genes in macrophage subtypes.	4.13e-32	1.19548	0.957	0.462	7.18e-28	0
Expression levels of cluster-specific marker genes in macrophage subtypes.	5.92e-32	0.662778	0.886	0.366	1.03e-27	0
Expression levels of cluster-specific marker genes in macrophage subtypes.	9.21e-32	0.755874	0.891	0.42	1.6e-27	0
Expression levels of cluster-specific marker genes in macrophage subtypes.	1.02e-31	0.721603	0.859	0.35	1.78e-27	0
Expression levels of cluster-specific marker genes in macrophage subtypes.	1.49e-31	0.639884	0.63	0.141	2.59e-27	0
Expression levels of cluster-specific marker genes in macrophage subtypes.	5.64e-31	0.800565	0.864	0.355	9.81e-27	0
Expression levels of cluster-specific marker genes in macrophage subtypes.	6.29e-31	0.764228	0.935	0.525	1.09e-26	0
Expression levels of cluster-specific marker genes in macrophage subtypes.	7.75e-31	0.487057	0.755	0.248	1.35e-26	0
Expression levels of cluster-specific marker genes in macrophage subtypes.	1.03e-30	0.669241	0.957	0.48	1.79e-26	0
Expression levels of cluster-specific marker genes in macrophage subtypes.	1.14e-30	0.468276	0.446	0.047	1.98e-26	0
Expression levels of cluster-specific marker genes in macrophage subtypes.	1.65e-30	0.316863	0.413	0.034	2.87e-26	0
Expression levels of cluster-specific marker genes in macrophage subtypes.	2.2e-30	0.788743	0.766	0.251	3.83e-26	0
Expression levels of cluster-specific marker genes in macrophage subtypes.	4.19e-30	0.423273	0.755	0.248	7.28e-26	0
Expression levels of cluster-specific marker genes in macrophage subtypes.	5.88e-30	1.72712	1	0.877	1.02e-25	0
Expression levels of cluster-specific marker genes in macrophage subtypes.	4.26e-29	0.385617	0.549	0.102	7.4e-25	0
Expression levels of cluster-specific marker genes in macrophage subtypes.	4.33e-29	0.603845	0.864	0.413	7.52e-25	0
Expression levels of cluster-specific marker genes in macrophage subtypes.	6.1e-29	0.429829	0.473	0.07	1.06e-24	0
Expression levels of cluster-specific marker genes in macrophage subtypes.	7.04e-29	0.711625	0.989	0.658	1.22e-24	0
Expression levels of cluster-specific marker genes in macrophage subtypes.	7.7e-29	0.634308	0.37	0.026	1.34e-24	0
Expression levels of cluster-specific marker genes in macrophage subtypes.	2.45e-28	1.03101	1	0.919	4.26e-24	0
Expression levels of cluster-specific marker genes in macrophage subtypes.	4.58e-28	0.925672	0.826	0.355	7.96e-24	0
Expression levels of cluster-specific marker genes in macrophage subtypes.	5.22e-28	0.465265	0.804	0.321	9.08e-24	0
Expression levels of cluster-specific marker genes in macrophage subtypes.	5.51e-28	0.450268	0.685	0.209	9.58e-24	0
Expression levels of cluster-specific marker genes in macrophage subtypes.	7.54e-28	0.539429	0.875	0.439	1.31e-23	0
Expression levels of cluster-specific marker genes in macrophage subtypes.	8.44e-28	0.543795	0.951	0.554	1.47e-23	0
Expression levels of cluster-specific marker genes in macrophage subtypes.	1.46e-27	0.88852	0.957	0.601	2.54e-23	0
Expression levels of cluster-specific marker genes in macrophage subtypes.	2.72e-27	0.469781	0.853	0.386	4.73e-23	0
Expression levels of cluster-specific marker genes in macrophage subtypes.	3.19e-27	0.69253	0.565	0.138	5.54e-23	0
Expression levels of cluster-specific marker genes in macrophage subtypes.	3.44e-27	0.553898	0.837	0.413	5.98e-23	0
Expression levels of cluster-specific marker genes in macrophage subtypes.	4.69e-27	0.425931	0.5	0.091	8.15e-23	0
Expression levels of cluster-specific marker genes in macrophage subtypes.	5.38e-27	0.634291	0.842	0.389	9.36e-23	0
Expression levels of cluster-specific marker genes in macrophage subtypes.	6.26e-27	0.523559	0.842	0.355	1.09e-22	0
Expression levels of cluster-specific marker genes in macrophage subtypes.	7.27e-27	0.39588	0.761	0.285	1.26e-22	0
Expression levels of cluster-specific marker genes in macrophage subtypes.	9.19e-27	1.06505	0.995	0.846	1.6e-22	0
Expression levels of cluster-specific marker genes in macrophage subtypes.	1.85e-26	0.606733	0.837	0.373	3.21e-22	0
Expression levels of cluster-specific marker genes in macrophage subtypes.	1.96e-26	0.743566	0.603	0.167	3.4e-22	0
Expression levels of cluster-specific marker genes in macrophage subtypes.	2.2e-26	0.66728	0.87	0.439	3.82e-22	0
Expression levels of cluster-specific marker genes in macrophage subtypes.	3.03e-26	0.398445	0.799	0.319	5.27e-22	0
Expression levels of cluster-specific marker genes in macrophage subtypes.	3.11e-26	0.599172	0.984	0.601	5.4e-22	0
Expression levels of cluster-specific marker genes in macrophage subtypes.	3.42e-26	0.29607	0.353	0.029	5.95e-22	0
Expression levels of cluster-specific marker genes in macrophage subtypes.	1.07e-25	0.715722	0.957	0.574	1.85e-21	0
Expression levels of cluster-specific marker genes in macrophage subtypes.	1.79e-25	0.390548	0.587	0.159	3.11e-21	0
Expression levels of cluster-specific marker genes in macrophage subtypes.	2.64e-25	0.499748	0.592	0.162	4.59e-21	0
Expression levels of cluster-specific marker genes in macrophage subtypes.	2.94e-25	0.461004	0.701	0.256	5.12e-21	0
Expression levels of cluster-specific marker genes in macrophage subtypes.	3.5e-25	0.582879	0.511	0.12	6.08e-21	0
Expression levels of cluster-specific marker genes in macrophage subtypes.	7.15e-25	0.591202	0.495	0.107	1.24e-20	0
Expression levels of cluster-specific marker genes in macrophage subtypes.	9.88e-25	0.86039	0.957	0.465	1.72e-20	0
Expression levels of cluster-specific marker genes in macrophage subtypes.	1.15e-24	0.59413	0.75	0.279	2.01e-20	0
Expression levels of cluster-specific marker genes in macrophage subtypes.	1.16e-24	0.555891	0.821	0.345	2.02e-20	0
Expression levels of cluster-specific marker genes in macrophage subtypes.	1.46e-24	0.504825	0.543	0.144	2.54e-20	0
Expression levels of cluster-specific marker genes in macrophage subtypes.	1.73e-24	0.401404	0.647	0.183	3.01e-20	0
Expression levels of cluster-specific marker genes in macrophage subtypes.	1.81e-24	0.524307	0.359	0.037	3.15e-20	0
Expression levels of cluster-specific marker genes in macrophage subtypes.	2.86e-24	0.413981	0.457	0.089	4.98e-20	0
Expression levels of cluster-specific marker genes in macrophage subtypes.	3.13e-24	0.383261	0.418	0.065	5.44e-20	0
Expression levels of cluster-specific marker genes in macrophage subtypes.	3.42e-24	0.28228	0.533	0.131	5.95e-20	0
Expression levels of cluster-specific marker genes in macrophage subtypes.	3.47e-24	0.360994	0.891	0.507	6.04e-20	0
Expression levels of cluster-specific marker genes in macrophage subtypes.	3.52e-24	0.421211	0.815	0.373	6.12e-20	0
Expression levels of cluster-specific marker genes in macrophage subtypes.	3.56e-24	0.675788	0.897	0.462	6.19e-20	0
Expression levels of cluster-specific marker genes in macrophage subtypes.	5.34e-24	0.558777	0.696	0.253	9.29e-20	0
Expression levels of cluster-specific marker genes in macrophage subtypes.	7.12e-24	0.449031	0.505	0.115	1.24e-19	0
Expression levels of cluster-specific marker genes in macrophage subtypes.	8.3e-24	0.708617	0.978	0.674	1.44e-19	0
Expression levels of cluster-specific marker genes in macrophage subtypes.	8.7e-24	0.378605	0.489	0.11	1.51e-19	0
Expression levels of cluster-specific marker genes in macrophage subtypes.	1.13e-23	0.423022	0.793	0.321	1.96e-19	0
Expression levels of cluster-specific marker genes in macrophage subtypes.	1.25e-23	0.443518	0.891	0.386	2.17e-19	0
Expression levels of cluster-specific marker genes in macrophage subtypes.	1.34e-23	0.50104	0.625	0.219	2.33e-19	0
Expression levels of cluster-specific marker genes in macrophage subtypes.	1.5e-23	0.793732	1	0.867	2.62e-19	0
Expression levels of cluster-specific marker genes in macrophage subtypes.	2.14e-23	0.259188	0.701	0.243	3.72e-19	0
Expression levels of cluster-specific marker genes in macrophage subtypes.	2.38e-23	0.638173	1	0.684	4.14e-19	0
Expression levels of cluster-specific marker genes in macrophage subtypes.	2.74e-23	0.643562	0.984	0.645	4.77e-19	0
Expression levels of cluster-specific marker genes in macrophage subtypes.	3.09e-23	0.412117	0.761	0.321	5.37e-19	0
Expression levels of cluster-specific marker genes in macrophage subtypes.	4.34e-23	0.666526	0.94	0.54	7.54e-19	0
Expression levels of cluster-specific marker genes in macrophage subtypes.	4.83e-23	0.519493	0.918	0.486	8.39e-19	0
Expression levels of cluster-specific marker genes in macrophage subtypes.	4.83e-23	0.508802	0.783	0.371	8.4e-19	0
Expression levels of cluster-specific marker genes in macrophage subtypes.	5.3e-23	0.382125	0.353	0.039	9.22e-19	0
Expression levels of cluster-specific marker genes in macrophage subtypes.	8.91e-23	0.537526	0.674	0.245	1.55e-18	0
Expression levels of cluster-specific marker genes in macrophage subtypes.	9.02e-23	0.27904	0.886	0.457	1.57e-18	0
Expression levels of cluster-specific marker genes in macrophage subtypes.	9.9e-23	0.494793	0.793	0.386	1.72e-18	0
Expression levels of cluster-specific marker genes in macrophage subtypes.	1.08e-22	0.466804	0.864	0.418	1.87e-18	0
Expression levels of cluster-specific marker genes in macrophage subtypes.	2.44e-22	0.63171	0.913	0.504	4.24e-18	0
Expression levels of cluster-specific marker genes in macrophage subtypes.	2.82e-22	0.564898	0.935	0.559	4.91e-18	0
Expression levels of cluster-specific marker genes in macrophage subtypes.	2.99e-22	0.449678	0.777	0.313	5.2e-18	0
Expression levels of cluster-specific marker genes in macrophage subtypes.	3.25e-22	0.730383	0.761	0.35	5.64e-18	0
Expression levels of cluster-specific marker genes in macrophage subtypes.	5.8e-22	0.387981	0.5	0.125	1.01e-17	0
Expression levels of cluster-specific marker genes in macrophage subtypes.	6.69e-22	0.514456	0.668	0.222	1.16e-17	0
Expression levels of cluster-specific marker genes in macrophage subtypes.	8.6e-22	0.634991	0.978	0.611	1.5e-17	0
Expression levels of cluster-specific marker genes in macrophage subtypes.	9.67e-22	0.530298	0.668	0.222	1.68e-17	0
Expression levels of cluster-specific marker genes in macrophage subtypes.	1e-21	0.48015	0.788	0.368	1.74e-17	0
Expression levels of cluster-specific marker genes in macrophage subtypes.	1.22e-21	0.55504	0.978	0.567	2.12e-17	0
Expression levels of cluster-specific marker genes in macrophage subtypes.	1.26e-21	0.436843	0.712	0.264	2.19e-17	0
Expression levels of cluster-specific marker genes in macrophage subtypes.	1.4e-21	0.452009	0.701	0.279	2.44e-17	0
Expression levels of cluster-specific marker genes in macrophage subtypes.	1.42e-21	0.568956	0.663	0.256	2.48e-17	0
Expression levels of cluster-specific marker genes in macrophage subtypes.	1.43e-21	0.531825	0.842	0.428	2.49e-17	0
Expression levels of cluster-specific marker genes in macrophage subtypes.	1.54e-21	0.261187	0.62	0.196	2.67e-17	0
Expression levels of cluster-specific marker genes in macrophage subtypes.	1.63e-21	0.495512	0.772	0.337	2.83e-17	0
Expression levels of cluster-specific marker genes in macrophage subtypes.	2.05e-21	1.03581	0.56	0.188	3.56e-17	0
Expression levels of cluster-specific marker genes in macrophage subtypes.	2.23e-21	0.289752	0.75	0.316	3.89e-17	0
Expression levels of cluster-specific marker genes in macrophage subtypes.	2.54e-21	0.274203	0.5	0.123	4.42e-17	0
Expression levels of cluster-specific marker genes in macrophage subtypes.	2.66e-21	0.273796	0.609	0.185	4.62e-17	0
Expression levels of cluster-specific marker genes in macrophage subtypes.	3.78e-21	0.590163	0.891	0.48	6.57e-17	0
Expression levels of cluster-specific marker genes in macrophage subtypes.	3.95e-21	0.426885	0.739	0.313	6.86e-17	0
Expression levels of cluster-specific marker genes in macrophage subtypes.	4.21e-21	0.35864	0.429	0.089	7.33e-17	0
Expression levels of cluster-specific marker genes in macrophage subtypes.	4.83e-21	0.335089	0.478	0.117	8.39e-17	0
Expression levels of cluster-specific marker genes in macrophage subtypes.	4.96e-21	0.355158	0.723	0.321	8.62e-17	0
Expression levels of cluster-specific marker genes in macrophage subtypes.	7.06e-21	0.453437	0.897	0.478	1.23e-16	0
Expression levels of cluster-specific marker genes in macrophage subtypes.	7.72e-21	0.428812	0.62	0.23	1.34e-16	0
Expression levels of cluster-specific marker genes in macrophage subtypes.	9.16e-21	0.763594	1	0.851	1.59e-16	0
Expression levels of cluster-specific marker genes in macrophage subtypes.	1.02e-20	0.498326	0.793	0.402	1.78e-16	0
Expression levels of cluster-specific marker genes in macrophage subtypes.	1.63e-20	1.07649	0.913	0.577	2.84e-16	0
Expression levels of cluster-specific marker genes in macrophage subtypes.	1.77e-20	0.457212	0.864	0.488	3.07e-16	0
Expression levels of cluster-specific marker genes in macrophage subtypes.	1.93e-20	0.389641	0.609	0.219	3.36e-16	0
Expression levels of cluster-specific marker genes in macrophage subtypes.	1.98e-20	0.450674	0.603	0.219	3.44e-16	0
Expression levels of cluster-specific marker genes in macrophage subtypes.	2.76e-20	0.785386	0.973	0.655	4.8e-16	0
Expression levels of cluster-specific marker genes in macrophage subtypes.	2.77e-20	0.430734	0.707	0.292	4.81e-16	0
Expression levels of cluster-specific marker genes in macrophage subtypes.	2.93e-20	0.423707	0.609	0.201	5.09e-16	0
Expression levels of cluster-specific marker genes in macrophage subtypes.	2.96e-20	0.310954	0.69	0.258	5.14e-16	0
Expression levels of cluster-specific marker genes in macrophage subtypes.	4.42e-20	0.294493	0.891	0.478	7.68e-16	0
Expression levels of cluster-specific marker genes in macrophage subtypes.	5.28e-20	0.312382	0.821	0.366	9.19e-16	0
Expression levels of cluster-specific marker genes in macrophage subtypes.	5.58e-20	0.298751	0.549	0.17	9.71e-16	0
Expression levels of cluster-specific marker genes in macrophage subtypes.	6.4e-20	0.376581	0.793	0.36	1.11e-15	0
Expression levels of cluster-specific marker genes in macrophage subtypes.	7.74e-20	0.419186	0.712	0.3	1.35e-15	0
Expression levels of cluster-specific marker genes in macrophage subtypes.	1.29e-19	0.417552	0.897	0.514	2.24e-15	0
Expression levels of cluster-specific marker genes in macrophage subtypes.	1.32e-19	0.407959	0.978	0.611	2.3e-15	0
Expression levels of cluster-specific marker genes in macrophage subtypes.	1.33e-19	0.583441	0.614	0.23	2.32e-15	0
Expression levels of cluster-specific marker genes in macrophage subtypes.	1.58e-19	0.511357	0.533	0.178	2.75e-15	0
Expression levels of cluster-specific marker genes in macrophage subtypes.	1.87e-19	0.266567	0.543	0.151	3.25e-15	0
Expression levels of cluster-specific marker genes in macrophage subtypes.	2.15e-19	0.37265	0.87	0.486	3.74e-15	0
Expression levels of cluster-specific marker genes in macrophage subtypes.	2.64e-19	0.354633	0.549	0.18	4.59e-15	0
Expression levels of cluster-specific marker genes in macrophage subtypes.	2.74e-19	0.536327	0.989	0.629	4.77e-15	0
Expression levels of cluster-specific marker genes in macrophage subtypes.	2.78e-19	0.531476	0.668	0.277	4.83e-15	0
Expression levels of cluster-specific marker genes in macrophage subtypes.	2.79e-19	0.360738	0.408	0.089	4.85e-15	0
Expression levels of cluster-specific marker genes in macrophage subtypes.	2.83e-19	0.451096	0.783	0.368	4.92e-15	0
Expression levels of cluster-specific marker genes in macrophage subtypes.	2.99e-19	0.376179	0.826	0.428	5.19e-15	0
Expression levels of cluster-specific marker genes in macrophage subtypes.	3.02e-19	0.380515	0.913	0.582	5.24e-15	0
Expression levels of cluster-specific marker genes in macrophage subtypes.	3.6e-19	0.419542	0.473	0.117	6.26e-15	0
Expression levels of cluster-specific marker genes in macrophage subtypes.	3.7e-19	1.28598	0.842	0.478	6.44e-15	0
Expression levels of cluster-specific marker genes in macrophage subtypes.	5.33e-19	0.302731	0.842	0.446	9.26e-15	0
Expression levels of cluster-specific marker genes in macrophage subtypes.	6.12e-19	0.414893	0.364	0.07	1.06e-14	0
Expression levels of cluster-specific marker genes in macrophage subtypes.	6.24e-19	0.298715	0.668	0.282	1.08e-14	0
Expression levels of cluster-specific marker genes in macrophage subtypes.	9.59e-19	0.507803	0.674	0.285	1.67e-14	0
Expression levels of cluster-specific marker genes in macrophage subtypes.	1.17e-18	0.450831	0.783	0.373	2.03e-14	0
Expression levels of cluster-specific marker genes in macrophage subtypes.	1.2e-18	0.437255	0.821	0.386	2.08e-14	0
Expression levels of cluster-specific marker genes in macrophage subtypes.	1.32e-18	0.275784	0.853	0.428	2.29e-14	0
Expression levels of cluster-specific marker genes in macrophage subtypes.	1.34e-18	0.421175	0.451	0.117	2.33e-14	0
Expression levels of cluster-specific marker genes in macrophage subtypes.	1.36e-18	0.411678	0.658	0.29	2.36e-14	0
Expression levels of cluster-specific marker genes in macrophage subtypes.	1.38e-18	0.522973	0.766	0.402	2.39e-14	0
Expression levels of cluster-specific marker genes in macrophage subtypes.	1.42e-18	0.295073	0.832	0.467	2.47e-14	0
Expression levels of cluster-specific marker genes in macrophage subtypes.	1.45e-18	0.443039	0.424	0.099	2.52e-14	0
Expression levels of cluster-specific marker genes in macrophage subtypes.	1.52e-18	0.392442	0.717	0.311	2.64e-14	0
Expression levels of cluster-specific marker genes in macrophage subtypes.	1.8e-18	0.499255	0.739	0.326	3.13e-14	0
Expression levels of cluster-specific marker genes in macrophage subtypes.	2.07e-18	0.701906	0.799	0.379	3.6e-14	0
Expression levels of cluster-specific marker genes in macrophage subtypes.	2.12e-18	0.339681	0.75	0.313	3.69e-14	0
Expression levels of cluster-specific marker genes in macrophage subtypes.	2.61e-18	0.475369	0.755	0.319	4.54e-14	0
Expression levels of cluster-specific marker genes in macrophage subtypes.	2.65e-18	0.405891	0.793	0.386	4.61e-14	0
Expression levels of cluster-specific marker genes in macrophage subtypes.	2.71e-18	0.348372	0.598	0.222	4.72e-14	0
Expression levels of cluster-specific marker genes in macrophage subtypes.	2.78e-18	0.518584	0.598	0.232	4.84e-14	0
Expression levels of cluster-specific marker genes in macrophage subtypes.	2.8e-18	0.361747	0.505	0.162	4.87e-14	0
Expression levels of cluster-specific marker genes in macrophage subtypes.	3.24e-18	0.364435	0.929	0.567	5.63e-14	0
Expression levels of cluster-specific marker genes in macrophage subtypes.	3.86e-18	0.455991	0.739	0.35	6.71e-14	0
Expression levels of cluster-specific marker genes in macrophage subtypes.	4.16e-18	0.397474	0.924	0.452	7.23e-14	0
Expression levels of cluster-specific marker genes in macrophage subtypes.	4.19e-18	0.359001	0.87	0.512	7.29e-14	0
Expression levels of cluster-specific marker genes in macrophage subtypes.	5.04e-18	0.634103	0.717	0.334	8.76e-14	0
Expression levels of cluster-specific marker genes in macrophage subtypes.	5.12e-18	0.421366	0.832	0.465	8.91e-14	0
Expression levels of cluster-specific marker genes in macrophage subtypes.	5.87e-18	0.743121	0.891	0.554	1.02e-13	0
Expression levels of cluster-specific marker genes in macrophage subtypes.	6.04e-18	0.476018	0.696	0.313	1.05e-13	0
Expression levels of cluster-specific marker genes in macrophage subtypes.	6.13e-18	0.691393	0.489	0.149	1.07e-13	0
Expression levels of cluster-specific marker genes in macrophage subtypes.	7.63e-18	0.41159	0.641	0.274	1.33e-13	0
Expression levels of cluster-specific marker genes in macrophage subtypes.	8.4e-18	0.251904	0.424	0.11	1.46e-13	0
Expression levels of cluster-specific marker genes in macrophage subtypes.	8.66e-18	0.792862	0.989	0.671	1.51e-13	0
Expression levels of cluster-specific marker genes in macrophage subtypes.	8.74e-18	0.442681	0.674	0.295	1.52e-13	0
Expression levels of cluster-specific marker genes in macrophage subtypes.	1.16e-17	0.354185	0.897	0.491	2.02e-13	0
Expression levels of cluster-specific marker genes in macrophage subtypes.	1.18e-17	0.667051	1	0.791	2.06e-13	0
Expression levels of cluster-specific marker genes in macrophage subtypes.	1.38e-17	0.345399	0.87	0.467	2.39e-13	0
Expression levels of cluster-specific marker genes in macrophage subtypes.	1.52e-17	0.401739	0.777	0.41	2.65e-13	0
Expression levels of cluster-specific marker genes in macrophage subtypes.	1.54e-17	0.41518	0.815	0.457	2.68e-13	0
Expression levels of cluster-specific marker genes in macrophage subtypes.	1.57e-17	0.7225	0.929	0.577	2.73e-13	0
Expression levels of cluster-specific marker genes in macrophage subtypes.	1.64e-17	0.258523	0.674	0.305	2.86e-13	0
Expression levels of cluster-specific marker genes in macrophage subtypes.	1.68e-17	0.430765	0.679	0.298	2.92e-13	0
Expression levels of cluster-specific marker genes in macrophage subtypes.	1.94e-17	0.314413	0.391	0.089	3.38e-13	0
Expression levels of cluster-specific marker genes in macrophage subtypes.	2.01e-17	0.264676	0.457	0.123	3.5e-13	0
Expression levels of cluster-specific marker genes in macrophage subtypes.	2.26e-17	0.37697	0.935	0.567	3.93e-13	0
Expression levels of cluster-specific marker genes in macrophage subtypes.	2.31e-17	0.453886	0.793	0.444	4.02e-13	0
Expression levels of cluster-specific marker genes in macrophage subtypes.	2.42e-17	0.904495	0.837	0.496	4.22e-13	0
Expression levels of cluster-specific marker genes in macrophage subtypes.	2.51e-17	0.455428	0.859	0.509	4.36e-13	0
Expression levels of cluster-specific marker genes in macrophage subtypes.	2.57e-17	0.31151	0.788	0.405	4.47e-13	0
Expression levels of cluster-specific marker genes in macrophage subtypes.	2.96e-17	0.433878	0.842	0.488	5.15e-13	0
Expression levels of cluster-specific marker genes in macrophage subtypes.	3.08e-17	0.371476	0.815	0.47	5.35e-13	0
Expression levels of cluster-specific marker genes in macrophage subtypes.	3.48e-17	0.484333	0.538	0.18	6.05e-13	0
Expression levels of cluster-specific marker genes in macrophage subtypes.	4.52e-17	0.822641	0.277	0.037	7.86e-13	0
Expression levels of cluster-specific marker genes in macrophage subtypes.	4.89e-17	0.402318	0.935	0.556	8.51e-13	0
Expression levels of cluster-specific marker genes in macrophage subtypes.	5.07e-17	0.334834	0.951	0.59	8.81e-13	0
Expression levels of cluster-specific marker genes in macrophage subtypes.	5.13e-17	0.301772	0.984	0.632	8.91e-13	0
Expression levels of cluster-specific marker genes in macrophage subtypes.	5.13e-17	0.360249	0.739	0.339	8.92e-13	0
Expression levels of cluster-specific marker genes in macrophage subtypes.	5.21e-17	0.488367	0.739	0.368	9.06e-13	0
Expression levels of cluster-specific marker genes in macrophage subtypes.	5.87e-17	0.408729	0.685	0.311	1.02e-12	0
Expression levels of cluster-specific marker genes in macrophage subtypes.	6e-17	0.338708	0.902	0.525	1.04e-12	0
Expression levels of cluster-specific marker genes in macrophage subtypes.	6.96e-17	0.26896	0.625	0.266	1.21e-12	0
Expression levels of cluster-specific marker genes in macrophage subtypes.	7.08e-17	0.36915	0.587	0.23	1.23e-12	0
Expression levels of cluster-specific marker genes in macrophage subtypes.	7.72e-17	0.291053	0.799	0.423	1.34e-12	0
Expression levels of cluster-specific marker genes in macrophage subtypes.	7.76e-17	0.745398	0.886	0.509	1.35e-12	0
Expression levels of cluster-specific marker genes in macrophage subtypes.	8.35e-17	0.776685	0.908	0.587	1.45e-12	0
Expression levels of cluster-specific marker genes in macrophage subtypes.	8.42e-17	0.378781	0.902	0.475	1.46e-12	0
Expression levels of cluster-specific marker genes in macrophage subtypes.	9.94e-17	0.309037	0.832	0.452	1.73e-12	0
Expression levels of cluster-specific marker genes in macrophage subtypes.	1.01e-16	0.393036	0.788	0.426	1.76e-12	0
Expression levels of cluster-specific marker genes in macrophage subtypes.	1.24e-16	0.342338	0.842	0.478	2.16e-12	0
Expression levels of cluster-specific marker genes in macrophage subtypes.	1.32e-16	0.264561	0.321	0.06	2.3e-12	0
Expression levels of cluster-specific marker genes in macrophage subtypes.	1.35e-16	0.305746	0.679	0.295	2.36e-12	0
Expression levels of cluster-specific marker genes in macrophage subtypes.	1.47e-16	0.279388	0.375	0.094	2.55e-12	0
Expression levels of cluster-specific marker genes in macrophage subtypes.	1.55e-16	0.330316	0.484	0.154	2.69e-12	0
Expression levels of cluster-specific marker genes in macrophage subtypes.	1.74e-16	0.347107	0.668	0.287	3.03e-12	0
Expression levels of cluster-specific marker genes in macrophage subtypes.	2.27e-16	0.389563	0.815	0.413	3.95e-12	0
Expression levels of cluster-specific marker genes in macrophage subtypes.	2.34e-16	0.459548	0.924	0.624	4.06e-12	0
Expression levels of cluster-specific marker genes in macrophage subtypes.	2.37e-16	0.341016	0.859	0.467	4.13e-12	0
Expression levels of cluster-specific marker genes in macrophage subtypes.	2.67e-16	0.399741	0.783	0.41	4.64e-12	0
Expression levels of cluster-specific marker genes in macrophage subtypes.	2.79e-16	0.312641	0.772	0.389	4.85e-12	0
Expression levels of cluster-specific marker genes in macrophage subtypes.	2.8e-16	0.422458	0.957	0.606	4.86e-12	0
Expression levels of cluster-specific marker genes in macrophage subtypes.	3.05e-16	0.258106	0.679	0.303	5.3e-12	0
Expression levels of cluster-specific marker genes in macrophage subtypes.	3.37e-16	0.367408	0.707	0.339	5.85e-12	0
Expression levels of cluster-specific marker genes in macrophage subtypes.	3.5e-16	0.414587	0.793	0.402	6.09e-12	0
Expression levels of cluster-specific marker genes in macrophage subtypes.	3.62e-16	0.302323	0.902	0.538	6.29e-12	0
Expression levels of cluster-specific marker genes in macrophage subtypes.	3.88e-16	0.256221	0.962	0.629	6.74e-12	0
Expression levels of cluster-specific marker genes in macrophage subtypes.	4.08e-16	0.488533	0.918	0.561	7.09e-12	0
Expression levels of cluster-specific marker genes in macrophage subtypes.	4.7e-16	0.269074	0.658	0.308	8.17e-12	0
Expression levels of cluster-specific marker genes in macrophage subtypes.	5.36e-16	0.275912	0.25	0.029	9.31e-12	0
Expression levels of cluster-specific marker genes in macrophage subtypes.	5.54e-16	0.416024	0.853	0.48	9.63e-12	0
Expression levels of cluster-specific marker genes in macrophage subtypes.	5.78e-16	0.301601	0.527	0.188	1e-11	0
Expression levels of cluster-specific marker genes in macrophage subtypes.	6.14e-16	0.463567	0.549	0.209	1.07e-11	0
Expression levels of cluster-specific marker genes in macrophage subtypes.	6.39e-16	0.35054	0.837	0.491	1.11e-11	0
Expression levels of cluster-specific marker genes in macrophage subtypes.	6.52e-16	0.740843	0.962	0.634	1.13e-11	0
Expression levels of cluster-specific marker genes in macrophage subtypes.	6.94e-16	0.589496	0.37	0.094	1.21e-11	0
Expression levels of cluster-specific marker genes in macrophage subtypes.	6.97e-16	0.86405	0.418	0.12	1.21e-11	0
Expression levels of cluster-specific marker genes in macrophage subtypes.	8.08e-16	0.307684	0.745	0.363	1.41e-11	0
Expression levels of cluster-specific marker genes in macrophage subtypes.	9.27e-16	0.336867	0.652	0.295	1.61e-11	0
Expression levels of cluster-specific marker genes in macrophage subtypes.	1.01e-15	0.633893	0.81	0.486	1.76e-11	0
Expression levels of cluster-specific marker genes in macrophage subtypes.	1.01e-15	0.304629	0.63	0.29	1.76e-11	0
Expression levels of cluster-specific marker genes in macrophage subtypes.	1.07e-15	0.322711	0.527	0.18	1.86e-11	0
Expression levels of cluster-specific marker genes in macrophage subtypes.	1.12e-15	0.501703	0.636	0.285	1.95e-11	0
Expression levels of cluster-specific marker genes in macrophage subtypes.	1.13e-15	0.254299	0.582	0.24	1.97e-11	0
Expression levels of cluster-specific marker genes in macrophage subtypes.	1.2e-15	0.57398	1	0.812	2.09e-11	0
Expression levels of cluster-specific marker genes in macrophage subtypes.	1.23e-15	0.382274	0.859	0.488	2.15e-11	0
Expression levels of cluster-specific marker genes in macrophage subtypes.	1.24e-15	0.291337	0.446	0.141	2.16e-11	0
Expression levels of cluster-specific marker genes in macrophage subtypes.	1.27e-15	0.424236	0.63	0.274	2.2e-11	0
Expression levels of cluster-specific marker genes in macrophage subtypes.	1.29e-15	0.486587	0.978	0.684	2.24e-11	0
Expression levels of cluster-specific marker genes in macrophage subtypes.	1.33e-15	0.331747	0.826	0.454	2.32e-11	0
Expression levels of cluster-specific marker genes in macrophage subtypes.	1.36e-15	0.327627	0.745	0.373	2.36e-11	0
Expression levels of cluster-specific marker genes in macrophage subtypes.	1.36e-15	0.487596	0.772	0.394	2.37e-11	0
Expression levels of cluster-specific marker genes in macrophage subtypes.	1.44e-15	0.287351	0.321	0.063	2.5e-11	0
Expression levels of cluster-specific marker genes in macrophage subtypes.	1.47e-15	0.253923	0.668	0.295	2.56e-11	0
Expression levels of cluster-specific marker genes in macrophage subtypes.	1.55e-15	0.333719	0.473	0.159	2.69e-11	0
Expression levels of cluster-specific marker genes in macrophage subtypes.	1.59e-15	0.407619	0.538	0.198	2.77e-11	0
Expression levels of cluster-specific marker genes in macrophage subtypes.	2.04e-15	0.399227	0.652	0.305	3.54e-11	0
Expression levels of cluster-specific marker genes in macrophage subtypes.	2.34e-15	0.263158	0.967	0.666	4.07e-11	0
Expression levels of cluster-specific marker genes in macrophage subtypes.	2.44e-15	0.307312	0.342	0.078	4.24e-11	0
Expression levels of cluster-specific marker genes in macrophage subtypes.	2.6e-15	0.262036	0.571	0.222	4.51e-11	0
Expression levels of cluster-specific marker genes in macrophage subtypes.	2.79e-15	0.272706	0.772	0.384	4.85e-11	0
Expression levels of cluster-specific marker genes in macrophage subtypes.	2.88e-15	0.444683	0.962	0.637	5.01e-11	0
Expression levels of cluster-specific marker genes in macrophage subtypes.	3e-15	0.425306	0.576	0.227	5.21e-11	0
Expression levels of cluster-specific marker genes in macrophage subtypes.	3.11e-15	0.296118	0.549	0.214	5.41e-11	0
Expression levels of cluster-specific marker genes in macrophage subtypes.	3.38e-15	0.270746	0.516	0.178	5.88e-11	0
Expression levels of cluster-specific marker genes in macrophage subtypes.	3.4e-15	0.519793	0.701	0.352	5.91e-11	0
Expression levels of cluster-specific marker genes in macrophage subtypes.	3.6e-15	0.298174	0.609	0.258	6.26e-11	0
Expression levels of cluster-specific marker genes in macrophage subtypes.	3.77e-15	0.411132	0.788	0.433	6.55e-11	0
Expression levels of cluster-specific marker genes in macrophage subtypes.	3.79e-15	0.346934	0.386	0.104	6.59e-11	0
Expression levels of cluster-specific marker genes in macrophage subtypes.	3.96e-15	0.4781	1	0.869	6.89e-11	0
Expression levels of cluster-specific marker genes in macrophage subtypes.	4.02e-15	0.310143	0.62	0.269	6.99e-11	0
Expression levels of cluster-specific marker genes in macrophage subtypes.	4.46e-15	0.283767	0.266	0.042	7.76e-11	0
Expression levels of cluster-specific marker genes in macrophage subtypes.	4.59e-15	0.352228	0.717	0.339	7.98e-11	0
Expression levels of cluster-specific marker genes in macrophage subtypes.	4.63e-15	0.325885	0.663	0.295	8.05e-11	0
Expression levels of cluster-specific marker genes in macrophage subtypes.	5.19e-15	0.352562	0.62	0.277	9.03e-11	0
Expression levels of cluster-specific marker genes in macrophage subtypes.	5.39e-15	0.399241	0.522	0.196	9.36e-11	0
Expression levels of cluster-specific marker genes in macrophage subtypes.	6.03e-15	0.376675	0.63	0.292	1.05e-10	0
Expression levels of cluster-specific marker genes in macrophage subtypes.	6.39e-15	0.266269	0.522	0.196	1.11e-10	0
Expression levels of cluster-specific marker genes in macrophage subtypes.	6.85e-15	0.364776	0.62	0.277	1.19e-10	0
Expression levels of cluster-specific marker genes in macrophage subtypes.	7.08e-15	0.37535	0.63	0.29	1.23e-10	0
Expression levels of cluster-specific marker genes in macrophage subtypes.	7.19e-15	0.292635	0.761	0.428	1.25e-10	0
Expression levels of cluster-specific marker genes in macrophage subtypes.	7.92e-15	0.255887	0.511	0.188	1.38e-10	0
Expression levels of cluster-specific marker genes in macrophage subtypes.	8.39e-15	0.353174	0.478	0.167	1.46e-10	0
Expression levels of cluster-specific marker genes in macrophage subtypes.	8.42e-15	0.285089	0.44	0.138	1.46e-10	0
Expression levels of cluster-specific marker genes in macrophage subtypes.	8.86e-15	0.320417	0.484	0.178	1.54e-10	0
Expression levels of cluster-specific marker genes in macrophage subtypes.	8.96e-15	0.311084	0.554	0.23	1.56e-10	0
Expression levels of cluster-specific marker genes in macrophage subtypes.	9.34e-15	0.300385	0.875	0.501	1.62e-10	0
Expression levels of cluster-specific marker genes in macrophage subtypes.	9.4e-15	0.250021	0.522	0.198	1.63e-10	0
Expression levels of cluster-specific marker genes in macrophage subtypes.	1.02e-14	0.297781	0.375	0.099	1.77e-10	0
Expression levels of cluster-specific marker genes in macrophage subtypes.	1.02e-14	0.495013	0.723	0.405	1.78e-10	0
Expression levels of cluster-specific marker genes in macrophage subtypes.	1.07e-14	0.31907	0.707	0.363	1.86e-10	0
Expression levels of cluster-specific marker genes in macrophage subtypes.	1.11e-14	0.253769	0.81	0.428	1.92e-10	0
Expression levels of cluster-specific marker genes in macrophage subtypes.	1.12e-14	0.289543	0.679	0.329	1.94e-10	0
Expression levels of cluster-specific marker genes in macrophage subtypes.	1.18e-14	0.294573	0.516	0.185	2.06e-10	0
Expression levels of cluster-specific marker genes in macrophage subtypes.	1.19e-14	0.27679	0.283	0.05	2.07e-10	0
Expression levels of cluster-specific marker genes in macrophage subtypes.	1.24e-14	0.359221	0.696	0.345	2.16e-10	0
Expression levels of cluster-specific marker genes in macrophage subtypes.	1.29e-14	0.334577	0.543	0.217	2.25e-10	0
Expression levels of cluster-specific marker genes in macrophage subtypes.	1.31e-14	0.291836	0.446	0.141	2.28e-10	0
Expression levels of cluster-specific marker genes in macrophage subtypes.	1.32e-14	0.252904	0.592	0.24	2.3e-10	0
Expression levels of cluster-specific marker genes in macrophage subtypes.	1.33e-14	0.366514	0.495	0.188	2.32e-10	0
Expression levels of cluster-specific marker genes in macrophage subtypes.	1.35e-14	0.349854	0.777	0.407	2.34e-10	0
Expression levels of cluster-specific marker genes in macrophage subtypes.	1.48e-14	0.324222	0.408	0.12	2.58e-10	0
Expression levels of cluster-specific marker genes in macrophage subtypes.	1.52e-14	0.478851	0.522	0.206	2.64e-10	0
Expression levels of cluster-specific marker genes in macrophage subtypes.	1.81e-14	0.278506	0.402	0.123	3.15e-10	0
Expression levels of cluster-specific marker genes in macrophage subtypes.	1.85e-14	0.26088	0.772	0.399	3.22e-10	0
Expression levels of cluster-specific marker genes in macrophage subtypes.	2.03e-14	0.271987	0.891	0.509	3.53e-10	0
Expression levels of cluster-specific marker genes in macrophage subtypes.	2.03e-14	0.315813	0.402	0.12	3.53e-10	0
Expression levels of cluster-specific marker genes in macrophage subtypes.	2.13e-14	0.5063	0.853	0.507	3.7e-10	0
Expression levels of cluster-specific marker genes in macrophage subtypes.	2.17e-14	0.306849	0.527	0.214	3.77e-10	0
Expression levels of cluster-specific marker genes in macrophage subtypes.	2.31e-14	0.351252	0.522	0.201	4.01e-10	0
Expression levels of cluster-specific marker genes in macrophage subtypes.	2.34e-14	0.288162	0.614	0.272	4.08e-10	0
Expression levels of cluster-specific marker genes in macrophage subtypes.	2.36e-14	0.256578	0.457	0.149	4.1e-10	0
Expression levels of cluster-specific marker genes in macrophage subtypes.	2.57e-14	0.393966	0.973	0.653	4.47e-10	0
Expression levels of cluster-specific marker genes in macrophage subtypes.	2.61e-14	0.273351	0.652	0.313	4.53e-10	0
Expression levels of cluster-specific marker genes in macrophage subtypes.	3.07e-14	0.50353	0.913	0.564	5.35e-10	0
Expression levels of cluster-specific marker genes in macrophage subtypes.	3.31e-14	0.26125	0.761	0.394	5.76e-10	0
Expression levels of cluster-specific marker genes in macrophage subtypes.	4.12e-14	0.407844	0.679	0.332	7.16e-10	0
Expression levels of cluster-specific marker genes in macrophage subtypes.	4.57e-14	0.880904	0.685	0.342	7.95e-10	0
Expression levels of cluster-specific marker genes in macrophage subtypes.	4.62e-14	0.252442	0.728	0.358	8.03e-10	0
Expression levels of cluster-specific marker genes in macrophage subtypes.	4.75e-14	0.431493	0.973	0.679	8.26e-10	0
Expression levels of cluster-specific marker genes in macrophage subtypes.	4.88e-14	0.336737	0.538	0.214	8.48e-10	0
Expression levels of cluster-specific marker genes in macrophage subtypes.	5.07e-14	0.447611	0.598	0.285	8.82e-10	0
Expression levels of cluster-specific marker genes in macrophage subtypes.	5.11e-14	0.28717	0.734	0.379	8.88e-10	0
Expression levels of cluster-specific marker genes in macrophage subtypes.	5.23e-14	0.28041	0.701	0.347	9.09e-10	0
Expression levels of cluster-specific marker genes in macrophage subtypes.	5.26e-14	0.314817	0.875	0.491	9.14e-10	0
Expression levels of cluster-specific marker genes in macrophage subtypes.	5.86e-14	0.258595	0.685	0.337	1.02e-09	0
Expression levels of cluster-specific marker genes in macrophage subtypes.	5.88e-14	0.286659	0.489	0.18	1.02e-09	0
Expression levels of cluster-specific marker genes in macrophage subtypes.	6.16e-14	0.254121	0.522	0.193	1.07e-09	0
Expression levels of cluster-specific marker genes in macrophage subtypes.	6.4e-14	0.477472	0.978	0.671	1.11e-09	0
Expression levels of cluster-specific marker genes in macrophage subtypes.	7.07e-14	0.328816	0.641	0.311	1.23e-09	0
Expression levels of cluster-specific marker genes in macrophage subtypes.	7.47e-14	0.271387	0.342	0.089	1.3e-09	0
Expression levels of cluster-specific marker genes in macrophage subtypes.	7.84e-14	0.274012	0.391	0.115	1.36e-09	0
Expression levels of cluster-specific marker genes in macrophage subtypes.	8.88e-14	0.286488	0.576	0.274	1.54e-09	0
Expression levels of cluster-specific marker genes in macrophage subtypes.	8.95e-14	0.267104	0.973	0.666	1.56e-09	0
Expression levels of cluster-specific marker genes in macrophage subtypes.	9.06e-14	0.331882	0.978	0.668	1.58e-09	0
Expression levels of cluster-specific marker genes in macrophage subtypes.	9.18e-14	0.2843	0.283	0.06	1.6e-09	0
Expression levels of cluster-specific marker genes in macrophage subtypes.	9.44e-14	0.363508	0.658	0.324	1.64e-09	0
Expression levels of cluster-specific marker genes in macrophage subtypes.	9.94e-14	0.303102	0.766	0.433	1.73e-09	0
Expression levels of cluster-specific marker genes in macrophage subtypes.	1.04e-13	0.280091	0.875	0.488	1.82e-09	0
Expression levels of cluster-specific marker genes in macrophage subtypes.	1.07e-13	0.418908	0.696	0.342	1.86e-09	0
Expression levels of cluster-specific marker genes in macrophage subtypes.	1.12e-13	0.267987	0.386	0.115	1.94e-09	0
Expression levels of cluster-specific marker genes in macrophage subtypes.	1.18e-13	0.362986	0.522	0.196	2.05e-09	0
Expression levels of cluster-specific marker genes in macrophage subtypes.	1.2e-13	0.295104	0.652	0.29	2.09e-09	0
Expression levels of cluster-specific marker genes in macrophage subtypes.	1.25e-13	0.292091	0.842	0.483	2.17e-09	0
Expression levels of cluster-specific marker genes in macrophage subtypes.	1.35e-13	0.276193	0.473	0.172	2.34e-09	0
Expression levels of cluster-specific marker genes in macrophage subtypes.	1.35e-13	0.252643	0.69	0.347	2.34e-09	0
Expression levels of cluster-specific marker genes in macrophage subtypes.	1.41e-13	0.3078	0.522	0.219	2.45e-09	0
Expression levels of cluster-specific marker genes in macrophage subtypes.	1.42e-13	0.285464	0.701	0.358	2.47e-09	0
Expression levels of cluster-specific marker genes in macrophage subtypes.	1.45e-13	0.280681	0.495	0.175	2.53e-09	0
Expression levels of cluster-specific marker genes in macrophage subtypes.	1.46e-13	0.379572	0.56	0.243	2.54e-09	0
Expression levels of cluster-specific marker genes in macrophage subtypes.	1.47e-13	0.257018	0.386	0.12	2.55e-09	0
Expression levels of cluster-specific marker genes in macrophage subtypes.	1.48e-13	0.272799	0.924	0.585	2.58e-09	0
Expression levels of cluster-specific marker genes in macrophage subtypes.	1.63e-13	0.61899	0.728	0.358	2.83e-09	0
Expression levels of cluster-specific marker genes in macrophage subtypes.	1.66e-13	0.25745	0.359	0.104	2.89e-09	0
Expression levels of cluster-specific marker genes in macrophage subtypes.	1.7e-13	0.356089	0.984	0.689	2.96e-09	0
Expression levels of cluster-specific marker genes in macrophage subtypes.	1.83e-13	0.3496	0.5	0.196	3.18e-09	0
Expression levels of cluster-specific marker genes in macrophage subtypes.	1.94e-13	0.328891	0.337	0.089	3.37e-09	0
Expression levels of cluster-specific marker genes in macrophage subtypes.	1.96e-13	0.285276	0.478	0.175	3.42e-09	0
Expression levels of cluster-specific marker genes in macrophage subtypes.	2.1e-13	0.378572	0.783	0.436	3.66e-09	0
Expression levels of cluster-specific marker genes in macrophage subtypes.	2.26e-13	0.313561	0.609	0.282	3.93e-09	0
Expression levels of cluster-specific marker genes in macrophage subtypes.	2.3e-13	0.510014	0.837	0.483	4e-09	0
Expression levels of cluster-specific marker genes in macrophage subtypes.	2.57e-13	0.328303	0.326	0.086	4.48e-09	0
Expression levels of cluster-specific marker genes in macrophage subtypes.	3e-13	0.37279	0.929	0.58	5.22e-09	0
Expression levels of cluster-specific marker genes in macrophage subtypes.	3.02e-13	0.257108	0.946	0.587	5.26e-09	0
Expression levels of cluster-specific marker genes in macrophage subtypes.	3.13e-13	0.257629	0.636	0.277	5.44e-09	0
Expression levels of cluster-specific marker genes in macrophage subtypes.	3.32e-13	0.266326	0.533	0.23	5.77e-09	0
Expression levels of cluster-specific marker genes in macrophage subtypes.	3.45e-13	0.474171	0.826	0.46	6e-09	0
Expression levels of cluster-specific marker genes in macrophage subtypes.	3.94e-13	0.641584	0.69	0.366	6.86e-09	0
Expression levels of cluster-specific marker genes in macrophage subtypes.	4.11e-13	0.299398	0.418	0.144	7.15e-09	0
Expression levels of cluster-specific marker genes in macrophage subtypes.	4.46e-13	0.278575	0.598	0.269	7.75e-09	0
Expression levels of cluster-specific marker genes in macrophage subtypes.	4.52e-13	0.439926	0.967	0.567	7.85e-09	0
Expression levels of cluster-specific marker genes in macrophage subtypes.	4.63e-13	0.267663	0.935	0.627	8.05e-09	0
Expression levels of cluster-specific marker genes in macrophage subtypes.	5.34e-13	0.594792	0.261	0.05	9.28e-09	0
Expression levels of cluster-specific marker genes in macrophage subtypes.	5.57e-13	0.26656	0.478	0.185	9.68e-09	0
Expression levels of cluster-specific marker genes in macrophage subtypes.	5.97e-13	0.320389	0.804	0.418	1.04e-08	0
Expression levels of cluster-specific marker genes in macrophage subtypes.	6.1e-13	0.32049	0.755	0.446	1.06e-08	0
Expression levels of cluster-specific marker genes in macrophage subtypes.	6.42e-13	0.394579	0.962	0.621	1.12e-08	0
Expression levels of cluster-specific marker genes in macrophage subtypes.	6.46e-13	0.297638	0.75	0.402	1.12e-08	0
Expression levels of cluster-specific marker genes in macrophage subtypes.	6.89e-13	0.382424	0.62	0.295	1.2e-08	0
Expression levels of cluster-specific marker genes in macrophage subtypes.	7.11e-13	0.271625	0.897	0.603	1.24e-08	0
Expression levels of cluster-specific marker genes in macrophage subtypes.	7.27e-13	0.350974	0.641	0.332	1.26e-08	0
Expression levels of cluster-specific marker genes in macrophage subtypes.	7.27e-13	0.374341	0.832	0.488	1.26e-08	0
Expression levels of cluster-specific marker genes in macrophage subtypes.	7.29e-13	0.520534	0.886	0.533	1.27e-08	0
Expression levels of cluster-specific marker genes in macrophage subtypes.	7.5e-13	0.329655	0.489	0.185	1.3e-08	0
Expression levels of cluster-specific marker genes in macrophage subtypes.	9.43e-13	0.351282	0.478	0.188	1.64e-08	0
Expression levels of cluster-specific marker genes in macrophage subtypes.	9.62e-13	0.467896	0.457	0.17	1.67e-08	0
Expression levels of cluster-specific marker genes in macrophage subtypes.	1.08e-12	0.366946	1	0.802	1.88e-08	0
Expression levels of cluster-specific marker genes in macrophage subtypes.	1.12e-12	0.276003	0.864	0.507	1.94e-08	0
Expression levels of cluster-specific marker genes in macrophage subtypes.	1.15e-12	0.263572	0.609	0.272	2.01e-08	0
Expression levels of cluster-specific marker genes in macrophage subtypes.	1.2e-12	0.288067	0.685	0.345	2.08e-08	0
Expression levels of cluster-specific marker genes in macrophage subtypes.	1.23e-12	0.363982	0.848	0.514	2.15e-08	0
Expression levels of cluster-specific marker genes in macrophage subtypes.	1.27e-12	0.318975	0.462	0.183	2.21e-08	0
Expression levels of cluster-specific marker genes in macrophage subtypes.	1.31e-12	0.330101	0.571	0.258	2.27e-08	0
Expression levels of cluster-specific marker genes in macrophage subtypes.	1.33e-12	0.65032	0.255	0.052	2.32e-08	0
Expression levels of cluster-specific marker genes in macrophage subtypes.	1.38e-12	0.329141	0.674	0.324	2.4e-08	0
Expression levels of cluster-specific marker genes in macrophage subtypes.	1.38e-12	0.311255	0.527	0.209	2.41e-08	0
Expression levels of cluster-specific marker genes in macrophage subtypes.	1.4e-12	0.349073	0.63	0.311	2.44e-08	0
Expression levels of cluster-specific marker genes in macrophage subtypes.	1.41e-12	0.368781	0.554	0.245	2.46e-08	0
Expression levels of cluster-specific marker genes in macrophage subtypes.	1.49e-12	0.363409	0.696	0.358	2.6e-08	0
Expression levels of cluster-specific marker genes in macrophage subtypes.	1.52e-12	0.335267	0.62	0.279	2.64e-08	0
Expression levels of cluster-specific marker genes in macrophage subtypes.	1.56e-12	0.34034	0.603	0.282	2.72e-08	0
Expression levels of cluster-specific marker genes in macrophage subtypes.	1.58e-12	0.416088	0.701	0.36	2.75e-08	0
Expression levels of cluster-specific marker genes in macrophage subtypes.	1.66e-12	0.267412	0.772	0.46	2.89e-08	0
Expression levels of cluster-specific marker genes in macrophage subtypes.	1.86e-12	0.370151	1	0.768	3.24e-08	0
Expression levels of cluster-specific marker genes in macrophage subtypes.	2.28e-12	0.274746	0.783	0.433	3.96e-08	0
Expression levels of cluster-specific marker genes in macrophage subtypes.	2.29e-12	0.29534	0.44	0.159	3.99e-08	0
Expression levels of cluster-specific marker genes in macrophage subtypes.	2.38e-12	0.273516	0.75	0.402	4.14e-08	0
Expression levels of cluster-specific marker genes in macrophage subtypes.	2.4e-12	0.283188	0.592	0.253	4.17e-08	0
Expression levels of cluster-specific marker genes in macrophage subtypes.	2.4e-12	0.35097	0.826	0.496	4.18e-08	0
Expression levels of cluster-specific marker genes in macrophage subtypes.	2.66e-12	0.320112	0.478	0.191	4.63e-08	0
Expression levels of cluster-specific marker genes in macrophage subtypes.	2.81e-12	0.335727	0.81	0.454	4.88e-08	0
Expression levels of cluster-specific marker genes in macrophage subtypes.	3.24e-12	0.276657	0.745	0.394	5.63e-08	0
Expression levels of cluster-specific marker genes in macrophage subtypes.	3.29e-12	0.270583	0.386	0.125	5.72e-08	0
Expression levels of cluster-specific marker genes in macrophage subtypes.	3.32e-12	0.326677	0.967	0.689	5.76e-08	0
Expression levels of cluster-specific marker genes in macrophage subtypes.	3.9e-12	0.289516	0.652	0.342	6.77e-08	0
Expression levels of cluster-specific marker genes in macrophage subtypes.	4.04e-12	0.380276	0.543	0.243	7.02e-08	0
Expression levels of cluster-specific marker genes in macrophage subtypes.	4.74e-12	0.298949	0.603	0.269	8.25e-08	0
Expression levels of cluster-specific marker genes in macrophage subtypes.	4.82e-12	0.311846	0.603	0.285	8.39e-08	0
Expression levels of cluster-specific marker genes in macrophage subtypes.	5.06e-12	0.296826	0.522	0.219	8.79e-08	0
Expression levels of cluster-specific marker genes in macrophage subtypes.	5.07e-12	0.276594	0.647	0.324	8.82e-08	0
Expression levels of cluster-specific marker genes in macrophage subtypes.	5.44e-12	0.403955	0.962	0.632	9.46e-08	0
Expression levels of cluster-specific marker genes in macrophage subtypes.	5.95e-12	0.313175	0.527	0.227	1.03e-07	0
Expression levels of cluster-specific marker genes in macrophage subtypes.	6.93e-12	0.370693	0.832	0.48	1.21e-07	0
Expression levels of cluster-specific marker genes in macrophage subtypes.	7.44e-12	0.326024	0.636	0.326	1.29e-07	0
Expression levels of cluster-specific marker genes in macrophage subtypes.	7.47e-12	0.317414	0.516	0.222	1.3e-07	0
Expression levels of cluster-specific marker genes in macrophage subtypes.	7.65e-12	0.271991	0.348	0.102	1.33e-07	0
Expression levels of cluster-specific marker genes in macrophage subtypes.	7.72e-12	0.324564	0.842	0.486	1.34e-07	0
Expression levels of cluster-specific marker genes in macrophage subtypes.	8.18e-12	0.48991	1	0.883	1.42e-07	0
Expression levels of cluster-specific marker genes in macrophage subtypes.	9.02e-12	0.284159	0.701	0.379	1.57e-07	0
Expression levels of cluster-specific marker genes in macrophage subtypes.	9.11e-12	0.269853	0.614	0.303	1.58e-07	0
Expression levels of cluster-specific marker genes in macrophage subtypes.	1.03e-11	0.310222	0.565	0.251	1.8e-07	0
Expression levels of cluster-specific marker genes in macrophage subtypes.	1.35e-11	0.256742	0.853	0.522	2.34e-07	0
Expression levels of cluster-specific marker genes in macrophage subtypes.	1.35e-11	0.276175	0.408	0.154	2.34e-07	0
Expression levels of cluster-specific marker genes in macrophage subtypes.	1.37e-11	0.272199	0.772	0.444	2.38e-07	0
Expression levels of cluster-specific marker genes in macrophage subtypes.	1.41e-11	0.266827	0.408	0.151	2.45e-07	0
Expression levels of cluster-specific marker genes in macrophage subtypes.	1.42e-11	0.265099	0.429	0.164	2.47e-07	0
Expression levels of cluster-specific marker genes in macrophage subtypes.	1.44e-11	0.371333	0.728	0.405	2.51e-07	0
Expression levels of cluster-specific marker genes in macrophage subtypes.	1.47e-11	0.468582	0.853	0.535	2.55e-07	0
Expression levels of cluster-specific marker genes in macrophage subtypes.	1.57e-11	0.268275	0.418	0.151	2.73e-07	0
Expression levels of cluster-specific marker genes in macrophage subtypes.	1.6e-11	0.283566	0.353	0.115	2.78e-07	0
Expression levels of cluster-specific marker genes in macrophage subtypes.	1.67e-11	0.299189	0.886	0.527	2.91e-07	0
Expression levels of cluster-specific marker genes in macrophage subtypes.	2.19e-11	0.25236	0.467	0.196	3.8e-07	0
Expression levels of cluster-specific marker genes in macrophage subtypes.	2.24e-11	0.2506	0.832	0.462	3.9e-07	0
Expression levels of cluster-specific marker genes in macrophage subtypes.	2.84e-11	0.28202	0.418	0.157	4.94e-07	0
Expression levels of cluster-specific marker genes in macrophage subtypes.	2.87e-11	0.30017	0.717	0.399	4.98e-07	0
Expression levels of cluster-specific marker genes in macrophage subtypes.	3.11e-11	0.250884	0.261	0.063	5.41e-07	0
Expression levels of cluster-specific marker genes in macrophage subtypes.	3.28e-11	0.305417	0.826	0.439	5.71e-07	0
Expression levels of cluster-specific marker genes in macrophage subtypes.	3.42e-11	0.390754	0.696	0.376	5.94e-07	0
Expression levels of cluster-specific marker genes in macrophage subtypes.	3.54e-11	0.277289	0.94	0.611	6.15e-07	0
Expression levels of cluster-specific marker genes in macrophage subtypes.	3.57e-11	0.432161	0.989	0.731	6.2e-07	0
Expression levels of cluster-specific marker genes in macrophage subtypes.	3.63e-11	0.420941	0.848	0.543	6.3e-07	0
Expression levels of cluster-specific marker genes in macrophage subtypes.	3.75e-11	0.327224	0.598	0.298	6.52e-07	0
Expression levels of cluster-specific marker genes in macrophage subtypes.	4.3e-11	0.260773	0.728	0.413	7.47e-07	0
Expression levels of cluster-specific marker genes in macrophage subtypes.	4.43e-11	0.296927	0.94	0.582	7.71e-07	0
Expression levels of cluster-specific marker genes in macrophage subtypes.	4.57e-11	0.259093	0.717	0.423	7.95e-07	0
Expression levels of cluster-specific marker genes in macrophage subtypes.	4.65e-11	0.291815	0.848	0.54	8.09e-07	0
Expression levels of cluster-specific marker genes in macrophage subtypes.	4.8e-11	0.340566	0.685	0.386	8.35e-07	0
Expression levels of cluster-specific marker genes in macrophage subtypes.	6.3e-11	0.320155	1	0.88	1.09e-06	0
Expression levels of cluster-specific marker genes in macrophage subtypes.	6.62e-11	0.294102	0.429	0.175	1.15e-06	0
Expression levels of cluster-specific marker genes in macrophage subtypes.	7.21e-11	0.259853	0.478	0.214	1.25e-06	0
Expression levels of cluster-specific marker genes in macrophage subtypes.	7.32e-11	0.358663	0.864	0.54	1.27e-06	0
Expression levels of cluster-specific marker genes in macrophage subtypes.	7.44e-11	0.319878	0.799	0.488	1.29e-06	0
Expression levels of cluster-specific marker genes in macrophage subtypes.	7.51e-11	0.310047	0.478	0.214	1.31e-06	0
Expression levels of cluster-specific marker genes in macrophage subtypes.	7.77e-11	0.348386	0.527	0.243	1.35e-06	0
Expression levels of cluster-specific marker genes in macrophage subtypes.	7.83e-11	0.25487	0.685	0.368	1.36e-06	0
Expression levels of cluster-specific marker genes in macrophage subtypes.	7.95e-11	0.290871	0.56	0.266	1.38e-06	0
Expression levels of cluster-specific marker genes in macrophage subtypes.	9.15e-11	0.283933	0.435	0.175	1.59e-06	0
Expression levels of cluster-specific marker genes in macrophage subtypes.	9.23e-11	0.289247	0.788	0.486	1.61e-06	0
Expression levels of cluster-specific marker genes in macrophage subtypes.	9.51e-11	0.255284	0.342	0.117	1.65e-06	0
Expression levels of cluster-specific marker genes in macrophage subtypes.	1.29e-10	0.268829	0.364	0.131	2.25e-06	0
Expression levels of cluster-specific marker genes in macrophage subtypes.	1.49e-10	0.264952	0.614	0.308	2.58e-06	0
Expression levels of cluster-specific marker genes in macrophage subtypes.	1.53e-10	0.275353	0.679	0.381	2.66e-06	0
Expression levels of cluster-specific marker genes in macrophage subtypes.	1.76e-10	0.273025	0.549	0.258	3.06e-06	0
Expression levels of cluster-specific marker genes in macrophage subtypes.	1.82e-10	0.340043	0.701	0.373	3.17e-06	0
Expression levels of cluster-specific marker genes in macrophage subtypes.	1.82e-10	0.519049	0.995	0.775	3.17e-06	0
Expression levels of cluster-specific marker genes in macrophage subtypes.	1.87e-10	0.306462	0.734	0.436	3.25e-06	0
Expression levels of cluster-specific marker genes in macrophage subtypes.	1.89e-10	0.654813	0.326	0.104	3.28e-06	0
Expression levels of cluster-specific marker genes in macrophage subtypes.	2.03e-10	0.263402	0.815	0.457	3.53e-06	0
Expression levels of cluster-specific marker genes in macrophage subtypes.	2.07e-10	0.33484	0.364	0.136	3.59e-06	0
Expression levels of cluster-specific marker genes in macrophage subtypes.	2.56e-10	0.312811	0.957	0.614	4.45e-06	0
Expression levels of cluster-specific marker genes in macrophage subtypes.	2.6e-10	0.303422	0.924	0.59	4.53e-06	0
Expression levels of cluster-specific marker genes in macrophage subtypes.	2.73e-10	0.262573	0.342	0.117	4.75e-06	0
Expression levels of cluster-specific marker genes in macrophage subtypes.	2.78e-10	0.357962	0.734	0.436	4.83e-06	0
Expression levels of cluster-specific marker genes in macrophage subtypes.	2.81e-10	0.399841	0.516	0.261	4.88e-06	0
Expression levels of cluster-specific marker genes in macrophage subtypes.	3.1e-10	0.264572	0.913	0.569	5.38e-06	0
Expression levels of cluster-specific marker genes in macrophage subtypes.	3.57e-10	0.251928	0.571	0.282	6.2e-06	0
Expression levels of cluster-specific marker genes in macrophage subtypes.	3.76e-10	0.258899	0.522	0.24	6.54e-06	0
Expression levels of cluster-specific marker genes in macrophage subtypes.	3.87e-10	0.264434	0.783	0.431	6.74e-06	0
Expression levels of cluster-specific marker genes in macrophage subtypes.	3.92e-10	0.332503	0.897	0.595	6.81e-06	0
Expression levels of cluster-specific marker genes in macrophage subtypes.	4.26e-10	0.300422	0.62	0.329	7.4e-06	0
Expression levels of cluster-specific marker genes in macrophage subtypes.	4.62e-10	0.293927	0.777	0.488	8.04e-06	0
Expression levels of cluster-specific marker genes in macrophage subtypes.	4.7e-10	0.484984	0.94	0.671	8.18e-06	0
Expression levels of cluster-specific marker genes in macrophage subtypes.	5.5e-10	0.25239	0.717	0.42	9.57e-06	0
Expression levels of cluster-specific marker genes in macrophage subtypes.	5.77e-10	0.346965	0.897	0.574	1e-05	0
Expression levels of cluster-specific marker genes in macrophage subtypes.	5.79e-10	0.251959	0.315	0.107	1.01e-05	0
Expression levels of cluster-specific marker genes in macrophage subtypes.	6.1e-10	0.555464	1	0.802	1.06e-05	0
Expression levels of cluster-specific marker genes in macrophage subtypes.	6.23e-10	0.326541	0.56	0.279	1.08e-05	0
Expression levels of cluster-specific marker genes in macrophage subtypes.	6.83e-10	0.255718	0.543	0.258	1.19e-05	0
Expression levels of cluster-specific marker genes in macrophage subtypes.	8.17e-10	0.315231	0.815	0.488	1.42e-05	0
Expression levels of cluster-specific marker genes in macrophage subtypes.	8.82e-10	0.34385	0.56	0.269	1.53e-05	0
Expression levels of cluster-specific marker genes in macrophage subtypes.	9.57e-10	0.263915	0.978	0.674	1.66e-05	0
Expression levels of cluster-specific marker genes in macrophage subtypes.	9.93e-10	0.307205	0.766	0.454	1.73e-05	0
Expression levels of cluster-specific marker genes in macrophage subtypes.	1.03e-09	0.274428	0.277	0.086	1.79e-05	0
Expression levels of cluster-specific marker genes in macrophage subtypes.	1.04e-09	0.266182	0.549	0.261	1.81e-05	0
Expression levels of cluster-specific marker genes in macrophage subtypes.	1.05e-09	0.285979	0.788	0.452	1.83e-05	0
Expression levels of cluster-specific marker genes in macrophage subtypes.	1.23e-09	0.338617	0.543	0.285	2.14e-05	0
Expression levels of cluster-specific marker genes in macrophage subtypes.	1.38e-09	0.353152	0.565	0.274	2.39e-05	0
Expression levels of cluster-specific marker genes in macrophage subtypes.	1.38e-09	0.250547	0.332	0.123	2.4e-05	0
Expression levels of cluster-specific marker genes in macrophage subtypes.	1.43e-09	0.899542	0.924	0.689	2.48e-05	0
Expression levels of cluster-specific marker genes in macrophage subtypes.	1.45e-09	0.307562	0.576	0.295	2.52e-05	0
Expression levels of cluster-specific marker genes in macrophage subtypes.	1.47e-09	0.256547	0.543	0.277	2.56e-05	0
Expression levels of cluster-specific marker genes in macrophage subtypes.	1.96e-09	0.308294	0.641	0.363	3.41e-05	0
Expression levels of cluster-specific marker genes in macrophage subtypes.	1.98e-09	0.263233	0.359	0.138	3.45e-05	0
Expression levels of cluster-specific marker genes in macrophage subtypes.	2.51e-09	0.250428	0.375	0.146	4.36e-05	0
Expression levels of cluster-specific marker genes in macrophage subtypes.	2.52e-09	0.26372	0.571	0.292	4.38e-05	0
Expression levels of cluster-specific marker genes in macrophage subtypes.	2.53e-09	0.253634	0.5	0.24	4.41e-05	0
Expression levels of cluster-specific marker genes in macrophage subtypes.	2.69e-09	0.295069	0.511	0.248	4.67e-05	0
Expression levels of cluster-specific marker genes in macrophage subtypes.	2.73e-09	0.275239	0.696	0.423	4.75e-05	0
Expression levels of cluster-specific marker genes in macrophage subtypes.	3.12e-09	0.374035	0.62	0.345	5.43e-05	0
Expression levels of cluster-specific marker genes in macrophage subtypes.	3.33e-09	0.29993	0.685	0.386	5.78e-05	0
Expression levels of cluster-specific marker genes in macrophage subtypes.	3.63e-09	0.277862	0.37	0.149	6.31e-05	0
Expression levels of cluster-specific marker genes in macrophage subtypes.	4.97e-09	0.293491	0.685	0.389	8.64e-05	0
Expression levels of cluster-specific marker genes in macrophage subtypes.	5.03e-09	0.275628	0.668	0.399	8.74e-05	0
Expression levels of cluster-specific marker genes in macrophage subtypes.	5.42e-09	0.384761	0.462	0.23	9.43e-05	0
Expression levels of cluster-specific marker genes in macrophage subtypes.	5.47e-09	0.272456	0.424	0.196	9.5e-05	0
Expression levels of cluster-specific marker genes in macrophage subtypes.	5.84e-09	0.304377	0.38	0.157	0.000101574	0
Expression levels of cluster-specific marker genes in macrophage subtypes.	6.43e-09	0.382503	1	0.77	0.000111853	0
Expression levels of cluster-specific marker genes in macrophage subtypes.	6.55e-09	0.326721	0.772	0.483	0.00011392	0
Expression levels of cluster-specific marker genes in macrophage subtypes.	6.82e-09	0.252331	0.522	0.261	0.00011851	0
Expression levels of cluster-specific marker genes in macrophage subtypes.	7.22e-09	0.319136	0.516	0.264	0.000125542	0
Expression levels of cluster-specific marker genes in macrophage subtypes.	7.38e-09	0.259613	0.277	0.097	0.00012831	0
Expression levels of cluster-specific marker genes in macrophage subtypes.	7.88e-09	0.310632	0.565	0.303	0.000137069	0
Expression levels of cluster-specific marker genes in macrophage subtypes.	8.35e-09	0.368298	0.984	0.705	0.000145227	0
Expression levels of cluster-specific marker genes in macrophage subtypes.	8.95e-09	0.252468	1	0.903	0.000155551	0
Expression levels of cluster-specific marker genes in macrophage subtypes.	1.06e-08	0.264166	0.576	0.305	0.000184762	0
Expression levels of cluster-specific marker genes in macrophage subtypes.	1.12e-08	0.311011	0.582	0.326	0.000195515	0
Expression levels of cluster-specific marker genes in macrophage subtypes.	1.52e-08	0.319166	0.929	0.621	0.000264807	0
Expression levels of cluster-specific marker genes in macrophage subtypes.	2.18e-08	0.260876	0.663	0.381	0.000378644	0
Expression levels of cluster-specific marker genes in macrophage subtypes.	2.22e-08	0.257395	0.38	0.167	0.000386405	0
Expression levels of cluster-specific marker genes in macrophage subtypes.	2.54e-08	0.258172	0.424	0.188	0.000440991	0
Expression levels of cluster-specific marker genes in macrophage subtypes.	2.84e-08	0.297825	0.663	0.389	0.000493714	0
Expression levels of cluster-specific marker genes in macrophage subtypes.	3.49e-08	0.381963	0.859	0.572	0.000606815	0
Expression levels of cluster-specific marker genes in macrophage subtypes.	4.28e-08	0.260753	0.353	0.146	0.00074499	0
Expression levels of cluster-specific marker genes in macrophage subtypes.	5.04e-08	0.29108	0.56	0.308	0.000876064	0
Expression levels of cluster-specific marker genes in macrophage subtypes.	5.29e-08	0.2545	0.424	0.204	0.000920158	0
Expression levels of cluster-specific marker genes in macrophage subtypes.	5.69e-08	0.368794	0.587	0.332	0.000988631	0
Expression levels of cluster-specific marker genes in macrophage subtypes.	6.85e-08	0.272019	0.446	0.222	0.00119056	0
Expression levels of cluster-specific marker genes in macrophage subtypes.	6.95e-08	0.258019	0.641	0.373	0.00120882	0
Expression levels of cluster-specific marker genes in macrophage subtypes.	7.07e-08	0.27143	0.315	0.128	0.00122908	0
Expression levels of cluster-specific marker genes in macrophage subtypes.	7.14e-08	0.261476	0.647	0.363	0.00124112	0
Expression levels of cluster-specific marker genes in macrophage subtypes.	7.85e-08	0.2587	0.375	0.172	0.0013658	0
Expression levels of cluster-specific marker genes in macrophage subtypes.	8.36e-08	0.318184	0.571	0.332	0.00145286	0
Expression levels of cluster-specific marker genes in macrophage subtypes.	1.09e-07	0.287226	0.435	0.227	0.00189017	0
Expression levels of cluster-specific marker genes in macrophage subtypes.	1.2e-07	0.255432	0.451	0.232	0.00208731	0
Expression levels of cluster-specific marker genes in macrophage subtypes.	1.32e-07	0.356073	0.995	0.723	0.00228939	0
Expression levels of cluster-specific marker genes in macrophage subtypes.	2.05e-07	0.83596	0.668	0.444	0.0035561	0
Expression levels of cluster-specific marker genes in macrophage subtypes.	2.23e-07	0.27006	0.75	0.462	0.00387417	0
Expression levels of cluster-specific marker genes in macrophage subtypes.	3.02e-07	0.334187	0.995	0.71	0.00525838	0
Expression levels of cluster-specific marker genes in macrophage subtypes.	5.07e-07	0.38255	1	0.768	0.00881172	0
Expression levels of cluster-specific marker genes in macrophage subtypes.	5.61e-07	0.251321	0.989	0.731	0.00975428	0
Expression levels of cluster-specific marker genes in macrophage subtypes.	5.63e-07	0.257505	0.918	0.624	0.00978896	0
Expression levels of cluster-specific marker genes in macrophage subtypes.	6.37e-07	0.433172	0.467	0.248	0.0110741	0
Expression levels of cluster-specific marker genes in macrophage subtypes.	7.21e-07	0.387145	1	0.935	0.0125358	0
Expression levels of cluster-specific marker genes in macrophage subtypes.	7.3e-07	0.25499	0.5	0.279	0.0126846	0
Expression levels of cluster-specific marker genes in macrophage subtypes.	7.79e-07	0.255984	0.457	0.225	0.0135446	0
Expression levels of cluster-specific marker genes in macrophage subtypes.	8.3e-07	0.412872	0.75	0.478	0.0144269	0
Expression levels of cluster-specific marker genes in macrophage subtypes.	1.02e-06	0.298784	0.674	0.431	0.0176738	0
Expression levels of cluster-specific marker genes in macrophage subtypes.	1.53e-06	0.412755	0.951	0.721	0.0266226	0
Expression levels of cluster-specific marker genes in macrophage subtypes.	1.56e-06	0.271588	0.255	0.102	0.0271992	0
Expression levels of cluster-specific marker genes in macrophage subtypes.	1.68e-06	0.254606	0.87	0.574	0.0292043	0
Expression levels of cluster-specific marker genes in macrophage subtypes.	1.91e-06	0.284422	0.538	0.298	0.033254	0
Expression levels of cluster-specific marker genes in macrophage subtypes.	2.42e-06	0.354201	0.332	0.157	0.0421355	0
Expression levels of cluster-specific marker genes in macrophage subtypes.	2.83e-06	0.2536	0.38	0.196	0.0492372	0
Expression levels of cluster-specific marker genes in macrophage subtypes.	3.85e-06	0.658403	0.674	0.439	0.0670022	0
Expression levels of cluster-specific marker genes in macrophage subtypes.	5.9e-06	0.308315	0.967	0.736	0.102606	0
Expression levels of cluster-specific marker genes in macrophage subtypes.	1.24e-05	0.263161	0.679	0.426	0.21562	0
Expression levels of cluster-specific marker genes in macrophage subtypes.	3.07e-05	0.275758	0.647	0.418	0.534402	0
Expression levels of cluster-specific marker genes in macrophage subtypes.	3.19e-05	0.264627	0.25	0.117	0.554587	0
Expression levels of cluster-specific marker genes in macrophage subtypes.	8.32e-05	0.280691	0.984	0.757	1	0
Expression levels of cluster-specific marker genes in macrophage subtypes.	8.95e-05	0.252843	0.348	0.198	1	0
Expression levels of cluster-specific marker genes in macrophage subtypes.	0.000603106	0.28631	0.435	0.292	1	0
Expression levels of cluster-specific marker genes in macrophage subtypes.	0.00613075	0.288984	0.386	0.258	1	0
Expression levels of cluster-specific marker genes in macrophage subtypes.	9.84e-30	0.303923	0.114	0.83	1.71e-25	1
Expression levels of cluster-specific marker genes in macrophage subtypes.	9.23e-29	0.284587	0.121	0.837	1.61e-24	1
Expression levels of cluster-specific marker genes in macrophage subtypes.	2.9e-27	0.295258	0.129	0.828	5.05e-23	1
Expression levels of cluster-specific marker genes in macrophage subtypes.	4.16e-27	0.305074	0.083	0.726	7.23e-23	1
Expression levels of cluster-specific marker genes in macrophage subtypes.	5.99e-27	0.734702	0.129	0.83	1.04e-22	1
Expression levels of cluster-specific marker genes in macrophage subtypes.	6.33e-27	0.294596	0.129	0.818	1.1e-22	1
Expression levels of cluster-specific marker genes in macrophage subtypes.	6.99e-27	0.253635	0.121	0.802	1.22e-22	1
Expression levels of cluster-specific marker genes in macrophage subtypes.	2.33e-26	0.288962	0.152	0.851	4.05e-22	1
Expression levels of cluster-specific marker genes in macrophage subtypes.	1.14e-25	0.261764	0.091	0.724	1.98e-21	1
Expression levels of cluster-specific marker genes in macrophage subtypes.	1.75e-25	0.363276	0.129	0.802	3.04e-21	1
Expression levels of cluster-specific marker genes in macrophage subtypes.	2.34e-25	0.272057	0.182	0.915	4.07e-21	1
Expression levels of cluster-specific marker genes in macrophage subtypes.	2.6e-25	0.431709	0.159	0.883	4.52e-21	1
Expression levels of cluster-specific marker genes in macrophage subtypes.	2.84e-25	0.543432	0.114	0.761	4.93e-21	1
Expression levels of cluster-specific marker genes in macrophage subtypes.	3.33e-25	0.305258	0.076	0.697	5.78e-21	1
Expression levels of cluster-specific marker genes in macrophage subtypes.	3.97e-25	0.300187	0.098	0.738	6.9e-21	1
Expression levels of cluster-specific marker genes in macrophage subtypes.	4.9e-25	0.360057	0.091	0.71	8.52e-21	1
Expression levels of cluster-specific marker genes in macrophage subtypes.	7.61e-25	0.34779	0.076	0.676	1.32e-20	1
Expression levels of cluster-specific marker genes in macrophage subtypes.	1.51e-24	0.257779	0.144	0.825	2.62e-20	1
Expression levels of cluster-specific marker genes in macrophage subtypes.	3.14e-24	0.300005	0.106	0.736	5.46e-20	1
Expression levels of cluster-specific marker genes in macrophage subtypes.	3.92e-24	0.359094	0.106	0.733	6.81e-20	1
Expression levels of cluster-specific marker genes in macrophage subtypes.	4.51e-24	0.408932	0.152	0.848	7.84e-20	1
Expression levels of cluster-specific marker genes in macrophage subtypes.	4.74e-24	0.373063	0.114	0.749	8.24e-20	1
Expression levels of cluster-specific marker genes in macrophage subtypes.	5.47e-24	0.337042	0.098	0.715	9.52e-20	1
Expression levels of cluster-specific marker genes in macrophage subtypes.	2.04e-23	0.419498	0.091	0.699	3.54e-19	1
Expression levels of cluster-specific marker genes in macrophage subtypes.	2.04e-23	0.28011	0.121	0.759	3.54e-19	1
Expression levels of cluster-specific marker genes in macrophage subtypes.	2.27e-23	0.428658	0.083	0.671	3.95e-19	1
Expression levels of cluster-specific marker genes in macrophage subtypes.	2.78e-23	0.330713	0.083	0.669	4.84e-19	1
Expression levels of cluster-specific marker genes in macrophage subtypes.	3.26e-23	0.343421	0.114	0.733	5.67e-19	1
Expression levels of cluster-specific marker genes in macrophage subtypes.	3.27e-23	0.262336	0.197	0.922	5.68e-19	1
Expression levels of cluster-specific marker genes in macrophage subtypes.	3.63e-23	0.489835	0.114	0.733	6.31e-19	1
Expression levels of cluster-specific marker genes in macrophage subtypes.	3.95e-23	0.266792	0.152	0.821	6.87e-19	1
Expression levels of cluster-specific marker genes in macrophage subtypes.	4.5e-23	0.302866	0.121	0.749	7.83e-19	1
Expression levels of cluster-specific marker genes in macrophage subtypes.	4.93e-23	0.293612	0.136	0.791	8.57e-19	1
Expression levels of cluster-specific marker genes in macrophage subtypes.	5.81e-23	0.325182	0.091	0.68	1.01e-18	1
Expression levels of cluster-specific marker genes in macrophage subtypes.	5.83e-23	0.341353	0.167	0.851	1.01e-18	1
Expression levels of cluster-specific marker genes in macrophage subtypes.	1.34e-22	0.300114	0.114	0.726	2.33e-18	1
Expression levels of cluster-specific marker genes in macrophage subtypes.	1.44e-22	0.286833	0.174	0.855	2.5e-18	1
Expression levels of cluster-specific marker genes in macrophage subtypes.	1.7e-22	1.06132	0.129	0.754	2.96e-18	1
Expression levels of cluster-specific marker genes in macrophage subtypes.	1.83e-22	0.4081	0.152	0.802	3.18e-18	1
Expression levels of cluster-specific marker genes in macrophage subtypes.	2.1e-22	0.368726	0.136	0.772	3.66e-18	1
Expression levels of cluster-specific marker genes in macrophage subtypes.	2.3e-22	0.368001	0.136	0.761	4e-18	1
Expression levels of cluster-specific marker genes in macrophage subtypes.	2.4e-22	0.27843	0.121	0.736	4.17e-18	1
Expression levels of cluster-specific marker genes in macrophage subtypes.	2.63e-22	0.307827	0.106	0.701	4.58e-18	1
Expression levels of cluster-specific marker genes in macrophage subtypes.	3.32e-22	0.365228	0.144	0.791	5.76e-18	1
Expression levels of cluster-specific marker genes in macrophage subtypes.	3.41e-22	0.331434	0.144	0.779	5.93e-18	1
Expression levels of cluster-specific marker genes in macrophage subtypes.	3.59e-22	0.274403	0.152	0.791	6.24e-18	1
Expression levels of cluster-specific marker genes in macrophage subtypes.	3.73e-22	0.265037	0.061	0.602	6.49e-18	1
Expression levels of cluster-specific marker genes in macrophage subtypes.	3.97e-22	0.412392	0.121	0.736	6.9e-18	1
Expression levels of cluster-specific marker genes in macrophage subtypes.	4.22e-22	0.299043	0.114	0.706	7.34e-18	1
Expression levels of cluster-specific marker genes in macrophage subtypes.	4.25e-22	0.400487	0.106	0.701	7.38e-18	1
Expression levels of cluster-specific marker genes in macrophage subtypes.	5.58e-22	0.360508	0.106	0.713	9.7e-18	1
Expression levels of cluster-specific marker genes in macrophage subtypes.	7.19e-22	0.521917	0.098	0.678	1.25e-17	1
Expression levels of cluster-specific marker genes in macrophage subtypes.	7.28e-22	0.282531	0.068	0.625	1.27e-17	1
Expression levels of cluster-specific marker genes in macrophage subtypes.	7.38e-22	0.435459	0.083	0.66	1.28e-17	1
Expression levels of cluster-specific marker genes in macrophage subtypes.	7.85e-22	0.256369	0.098	0.687	1.37e-17	1
Expression levels of cluster-specific marker genes in macrophage subtypes.	9.65e-22	0.307297	0.053	0.591	1.68e-17	1
Expression levels of cluster-specific marker genes in macrophage subtypes.	1.04e-21	0.362501	0.083	0.644	1.81e-17	1
Expression levels of cluster-specific marker genes in macrophage subtypes.	1.27e-21	0.267365	0.167	0.828	2.21e-17	1
Expression levels of cluster-specific marker genes in macrophage subtypes.	1.4e-21	0.43055	0.098	0.687	2.43e-17	1
Expression levels of cluster-specific marker genes in macrophage subtypes.	1.84e-21	0.372995	0.114	0.706	3.2e-17	1
Expression levels of cluster-specific marker genes in macrophage subtypes.	1.91e-21	0.475999	0.106	0.69	3.32e-17	1
Expression levels of cluster-specific marker genes in macrophage subtypes.	2.61e-21	0.335315	0.061	0.6	4.54e-17	1
Expression levels of cluster-specific marker genes in macrophage subtypes.	2.62e-21	0.477835	0.121	0.72	4.56e-17	1
Expression levels of cluster-specific marker genes in macrophage subtypes.	2.85e-21	0.281425	0.068	0.614	4.96e-17	1
Expression levels of cluster-specific marker genes in macrophage subtypes.	2.94e-21	0.277389	0.129	0.731	5.11e-17	1
Expression levels of cluster-specific marker genes in macrophage subtypes.	2.95e-21	0.622319	0.106	0.685	5.13e-17	1
Expression levels of cluster-specific marker genes in macrophage subtypes.	3.28e-21	0.285935	0.167	0.818	5.7e-17	1
Expression levels of cluster-specific marker genes in macrophage subtypes.	3.75e-21	0.286075	0.182	0.864	6.53e-17	1
Expression levels of cluster-specific marker genes in macrophage subtypes.	3.79e-21	0.50804	0.121	0.713	6.59e-17	1
Expression levels of cluster-specific marker genes in macrophage subtypes.	4.15e-21	0.268542	0.091	0.662	7.21e-17	1
Expression levels of cluster-specific marker genes in macrophage subtypes.	4.21e-21	0.500195	0.121	0.729	7.32e-17	1
Expression levels of cluster-specific marker genes in macrophage subtypes.	4.93e-21	0.375427	0.061	0.595	8.57e-17	1
Expression levels of cluster-specific marker genes in macrophage subtypes.	5.79e-21	0.297569	0.197	0.897	1.01e-16	1
Expression levels of cluster-specific marker genes in macrophage subtypes.	6.23e-21	0.353197	0.121	0.715	1.08e-16	1
Expression levels of cluster-specific marker genes in macrophage subtypes.	6.32e-21	0.372676	0.189	0.862	1.1e-16	1
Expression levels of cluster-specific marker genes in macrophage subtypes.	7.56e-21	0.475454	0.197	0.883	1.31e-16	1
Expression levels of cluster-specific marker genes in macrophage subtypes.	7.82e-21	0.454339	0.121	0.715	1.36e-16	1
Expression levels of cluster-specific marker genes in macrophage subtypes.	8.1e-21	0.664883	0.098	0.674	1.41e-16	1
Expression levels of cluster-specific marker genes in macrophage subtypes.	9.05e-21	0.49785	0.106	0.69	1.57e-16	1
Expression levels of cluster-specific marker genes in macrophage subtypes.	9.81e-21	0.25216	0.076	0.611	1.7e-16	1
Expression levels of cluster-specific marker genes in macrophage subtypes.	9.89e-21	0.330974	0.076	0.621	1.72e-16	1
Expression levels of cluster-specific marker genes in macrophage subtypes.	1e-20	0.291892	0.068	0.607	1.74e-16	1
Expression levels of cluster-specific marker genes in macrophage subtypes.	1.04e-20	0.431218	0.098	0.66	1.8e-16	1
Expression levels of cluster-specific marker genes in macrophage subtypes.	1.04e-20	0.538742	0.083	0.628	1.81e-16	1
Expression levels of cluster-specific marker genes in macrophage subtypes.	1.08e-20	0.291957	0.129	0.738	1.87e-16	1
Expression levels of cluster-specific marker genes in macrophage subtypes.	1.15e-20	0.455705	0.159	0.798	2.01e-16	1
Expression levels of cluster-specific marker genes in macrophage subtypes.	1.23e-20	0.460257	0.068	0.593	2.14e-16	1
Expression levels of cluster-specific marker genes in macrophage subtypes.	1.34e-20	0.330327	0.068	0.605	2.32e-16	1
Expression levels of cluster-specific marker genes in macrophage subtypes.	1.35e-20	0.304355	0.076	0.621	2.35e-16	1
Expression levels of cluster-specific marker genes in macrophage subtypes.	1.36e-20	0.513544	0.068	0.605	2.37e-16	1
Expression levels of cluster-specific marker genes in macrophage subtypes.	1.45e-20	0.350008	0.061	0.575	2.52e-16	1
Expression levels of cluster-specific marker genes in macrophage subtypes.	1.64e-20	0.59503	0.114	0.701	2.85e-16	1
Expression levels of cluster-specific marker genes in macrophage subtypes.	1.67e-20	0.369627	0.068	0.591	2.91e-16	1
Expression levels of cluster-specific marker genes in macrophage subtypes.	1.84e-20	0.40252	0.121	0.706	3.21e-16	1
Expression levels of cluster-specific marker genes in macrophage subtypes.	2.48e-20	0.277691	0.189	0.853	4.32e-16	1
Expression levels of cluster-specific marker genes in macrophage subtypes.	2.53e-20	0.299578	0.038	0.533	4.4e-16	1
Expression levels of cluster-specific marker genes in macrophage subtypes.	3.1e-20	0.481478	0.106	0.674	5.39e-16	1
Expression levels of cluster-specific marker genes in macrophage subtypes.	3.4e-20	0.455845	0.083	0.63	5.91e-16	1
Expression levels of cluster-specific marker genes in macrophage subtypes.	3.67e-20	0.671777	0.182	0.841	6.37e-16	1
Expression levels of cluster-specific marker genes in macrophage subtypes.	3.93e-20	0.331929	0.197	0.864	6.84e-16	1
Expression levels of cluster-specific marker genes in macrophage subtypes.	3.94e-20	0.635617	0.121	0.701	6.84e-16	1
Expression levels of cluster-specific marker genes in macrophage subtypes.	4.03e-20	0.307888	0.152	0.766	7e-16	1
Expression levels of cluster-specific marker genes in macrophage subtypes.	4.18e-20	0.476818	0.121	0.699	7.26e-16	1
Expression levels of cluster-specific marker genes in macrophage subtypes.	5.55e-20	0.722493	0.114	0.68	9.65e-16	1
Expression levels of cluster-specific marker genes in macrophage subtypes.	5.8e-20	0.34408	0.144	0.743	1.01e-15	1
Expression levels of cluster-specific marker genes in macrophage subtypes.	6.33e-20	0.449812	0.144	0.738	1.1e-15	1
Expression levels of cluster-specific marker genes in macrophage subtypes.	7.29e-20	0.424402	0.121	0.692	1.27e-15	1
Expression levels of cluster-specific marker genes in macrophage subtypes.	7.76e-20	0.335827	0.091	0.632	1.35e-15	1
Expression levels of cluster-specific marker genes in macrophage subtypes.	1.25e-19	0.564127	0.121	0.687	2.17e-15	1
Expression levels of cluster-specific marker genes in macrophage subtypes.	1.26e-19	0.438426	0.136	0.724	2.2e-15	1
Expression levels of cluster-specific marker genes in macrophage subtypes.	1.62e-19	0.562517	0.098	0.639	2.81e-15	1
Expression levels of cluster-specific marker genes in macrophage subtypes.	1.71e-19	0.291296	0.114	0.671	2.97e-15	1
Expression levels of cluster-specific marker genes in macrophage subtypes.	1.76e-19	0.545239	0.098	0.639	3.06e-15	1
Expression levels of cluster-specific marker genes in macrophage subtypes.	1.78e-19	0.30487	0.053	0.552	3.09e-15	1
Expression levels of cluster-specific marker genes in macrophage subtypes.	2.11e-19	0.3505	0.227	0.926	3.66e-15	1
Expression levels of cluster-specific marker genes in macrophage subtypes.	2.14e-19	0.313664	0.114	0.676	3.73e-15	1
Expression levels of cluster-specific marker genes in macrophage subtypes.	2.18e-19	0.564099	0.083	0.605	3.79e-15	1
Expression levels of cluster-specific marker genes in macrophage subtypes.	2.29e-19	0.390264	0.091	0.618	3.97e-15	1
Expression levels of cluster-specific marker genes in macrophage subtypes.	2.46e-19	0.253979	0.136	0.722	4.28e-15	1
Expression levels of cluster-specific marker genes in macrophage subtypes.	2.69e-19	0.71946	0.068	0.57	4.67e-15	1
Expression levels of cluster-specific marker genes in macrophage subtypes.	2.73e-19	0.293219	0.076	0.586	4.76e-15	1
Expression levels of cluster-specific marker genes in macrophage subtypes.	2.95e-19	0.28608	0.068	0.577	5.13e-15	1
Expression levels of cluster-specific marker genes in macrophage subtypes.	3.08e-19	0.346344	0.182	0.818	5.36e-15	1
Expression levels of cluster-specific marker genes in macrophage subtypes.	3.52e-19	0.502051	0.114	0.669	6.13e-15	1
Expression levels of cluster-specific marker genes in macrophage subtypes.	3.61e-19	0.434238	0.114	0.676	6.28e-15	1
Expression levels of cluster-specific marker genes in macrophage subtypes.	3.7e-19	0.344559	0.144	0.74	6.44e-15	1
Expression levels of cluster-specific marker genes in macrophage subtypes.	4.89e-19	0.341215	0.121	0.68	8.5e-15	1
Expression levels of cluster-specific marker genes in macrophage subtypes.	6.25e-19	0.42184	0.114	0.651	1.09e-14	1
Expression levels of cluster-specific marker genes in macrophage subtypes.	6.48e-19	0.305574	0.144	0.74	1.13e-14	1
Expression levels of cluster-specific marker genes in macrophage subtypes.	6.6e-19	0.431299	0.167	0.772	1.15e-14	1
Expression levels of cluster-specific marker genes in macrophage subtypes.	6.8e-19	0.584473	0.106	0.644	1.18e-14	1
Expression levels of cluster-specific marker genes in macrophage subtypes.	7.06e-19	0.359861	0.083	0.593	1.23e-14	1
Expression levels of cluster-specific marker genes in macrophage subtypes.	7.32e-19	0.583653	0.167	0.793	1.27e-14	1
Expression levels of cluster-specific marker genes in macrophage subtypes.	7.65e-19	0.442305	0.182	0.821	1.33e-14	1
Expression levels of cluster-specific marker genes in macrophage subtypes.	7.88e-19	0.30612	0.242	0.91	1.37e-14	1
Expression levels of cluster-specific marker genes in macrophage subtypes.	7.98e-19	0.306331	0.061	0.556	1.39e-14	1
Expression levels of cluster-specific marker genes in macrophage subtypes.	8.41e-19	0.387151	0.205	0.862	1.46e-14	1
Expression levels of cluster-specific marker genes in macrophage subtypes.	8.78e-19	0.360699	0.083	0.595	1.53e-14	1
Expression levels of cluster-specific marker genes in macrophage subtypes.	8.9e-19	0.591565	0.098	0.639	1.55e-14	1
Expression levels of cluster-specific marker genes in macrophage subtypes.	9.55e-19	0.499373	0.106	0.639	1.66e-14	1
Expression levels of cluster-specific marker genes in macrophage subtypes.	9.72e-19	0.288178	0.129	0.687	1.69e-14	1
Expression levels of cluster-specific marker genes in macrophage subtypes.	1.02e-18	0.774878	0.136	0.708	1.77e-14	1
Expression levels of cluster-specific marker genes in macrophage subtypes.	1.03e-18	0.425051	0.114	0.66	1.78e-14	1
Expression levels of cluster-specific marker genes in macrophage subtypes.	1.09e-18	0.323745	0.068	0.57	1.89e-14	1
Expression levels of cluster-specific marker genes in macrophage subtypes.	1.19e-18	0.266291	0.235	0.926	2.07e-14	1
Expression levels of cluster-specific marker genes in macrophage subtypes.	1.2e-18	0.282792	0.045	0.52	2.09e-14	1
Expression levels of cluster-specific marker genes in macrophage subtypes.	1.29e-18	0.392331	0.106	0.641	2.25e-14	1
Expression levels of cluster-specific marker genes in macrophage subtypes.	1.4e-18	0.608449	0.098	0.623	2.44e-14	1
Expression levels of cluster-specific marker genes in macrophage subtypes.	1.52e-18	0.405835	0.076	0.584	2.65e-14	1
Expression levels of cluster-specific marker genes in macrophage subtypes.	1.59e-18	0.369782	0.076	0.572	2.77e-14	1
Expression levels of cluster-specific marker genes in macrophage subtypes.	2.12e-18	0.526235	0.068	0.554	3.68e-14	1
Expression levels of cluster-specific marker genes in macrophage subtypes.	2.35e-18	0.281493	0.061	0.547	4.09e-14	1
Expression levels of cluster-specific marker genes in macrophage subtypes.	2.43e-18	0.49536	0.106	0.644	4.23e-14	1
Expression levels of cluster-specific marker genes in macrophage subtypes.	2.47e-18	0.297386	0.242	0.926	4.3e-14	1
Expression levels of cluster-specific marker genes in macrophage subtypes.	2.77e-18	0.375847	0.03	0.48	4.81e-14	1
Expression levels of cluster-specific marker genes in macrophage subtypes.	2.79e-18	0.275344	0.045	0.501	4.86e-14	1
Expression levels of cluster-specific marker genes in macrophage subtypes.	2.92e-18	0.727718	0.136	0.701	5.07e-14	1
Expression levels of cluster-specific marker genes in macrophage subtypes.	3.27e-18	0.331707	0.114	0.648	5.68e-14	1
Expression levels of cluster-specific marker genes in macrophage subtypes.	3.28e-18	0.272737	0.053	0.517	5.7e-14	1
Expression levels of cluster-specific marker genes in macrophage subtypes.	3.28e-18	0.255788	0.106	0.628	5.71e-14	1
Expression levels of cluster-specific marker genes in macrophage subtypes.	3.31e-18	0.271788	0.053	0.529	5.75e-14	1
Expression levels of cluster-specific marker genes in macrophage subtypes.	3.43e-18	0.290666	0.068	0.549	5.97e-14	1
Expression levels of cluster-specific marker genes in macrophage subtypes.	3.5e-18	0.317719	0.091	0.598	6.08e-14	1
Expression levels of cluster-specific marker genes in macrophage subtypes.	3.66e-18	0.574866	0.159	0.745	6.36e-14	1
Expression levels of cluster-specific marker genes in macrophage subtypes.	3.66e-18	0.668011	0.189	0.821	6.36e-14	1
Expression levels of cluster-specific marker genes in macrophage subtypes.	3.91e-18	0.586998	0.106	0.63	6.8e-14	1
Expression levels of cluster-specific marker genes in macrophage subtypes.	3.93e-18	0.256415	0.045	0.499	6.83e-14	1
Expression levels of cluster-specific marker genes in macrophage subtypes.	4.69e-18	0.507552	0.106	0.63	8.15e-14	1
Expression levels of cluster-specific marker genes in macrophage subtypes.	4.84e-18	0.257998	0.061	0.531	8.41e-14	1
Expression levels of cluster-specific marker genes in macrophage subtypes.	4.93e-18	0.360992	0.22	0.871	8.57e-14	1
Expression levels of cluster-specific marker genes in macrophage subtypes.	5.33e-18	0.414689	0.076	0.563	9.26e-14	1
Expression levels of cluster-specific marker genes in macrophage subtypes.	6.72e-18	0.286069	0.083	0.577	1.17e-13	1
Expression levels of cluster-specific marker genes in macrophage subtypes.	7.09e-18	0.270967	0.053	0.522	1.23e-13	1
Expression levels of cluster-specific marker genes in macrophage subtypes.	7.63e-18	0.902045	0.159	0.74	1.33e-13	1
Expression levels of cluster-specific marker genes in macrophage subtypes.	8.29e-18	0.30988	0.076	0.556	1.44e-13	1
Expression levels of cluster-specific marker genes in macrophage subtypes.	8.41e-18	0.304107	0.045	0.494	1.46e-13	1
Expression levels of cluster-specific marker genes in macrophage subtypes.	8.69e-18	0.496712	0.083	0.584	1.51e-13	1
Expression levels of cluster-specific marker genes in macrophage subtypes.	9.04e-18	0.439158	0.121	0.655	1.57e-13	1
Expression levels of cluster-specific marker genes in macrophage subtypes.	9.25e-18	0.307381	0.091	0.591	1.61e-13	1
Expression levels of cluster-specific marker genes in macrophage subtypes.	1.11e-17	0.566413	0.174	0.766	1.92e-13	1
Expression levels of cluster-specific marker genes in macrophage subtypes.	1.12e-17	0.327481	0.091	0.589	1.95e-13	1
Expression levels of cluster-specific marker genes in macrophage subtypes.	1.2e-17	0.291358	0.083	0.579	2.09e-13	1
Expression levels of cluster-specific marker genes in macrophage subtypes.	1.22e-17	0.459178	0.121	0.653	2.11e-13	1
Expression levels of cluster-specific marker genes in macrophage subtypes.	1.22e-17	0.306812	0.227	0.883	2.13e-13	1
Expression levels of cluster-specific marker genes in macrophage subtypes.	1.22e-17	0.43839	0.076	0.554	2.13e-13	1
Expression levels of cluster-specific marker genes in macrophage subtypes.	1.48e-17	0.290081	0.091	0.591	2.58e-13	1
Expression levels of cluster-specific marker genes in macrophage subtypes.	1.49e-17	0.273266	0.076	0.566	2.6e-13	1
Expression levels of cluster-specific marker genes in macrophage subtypes.	1.57e-17	0.394252	0.061	0.522	2.72e-13	1
Expression levels of cluster-specific marker genes in macrophage subtypes.	1.6e-17	0.421096	0.083	0.57	2.78e-13	1
Expression levels of cluster-specific marker genes in macrophage subtypes.	1.61e-17	0.390963	0.076	0.554	2.79e-13	1
Expression levels of cluster-specific marker genes in macrophage subtypes.	1.68e-17	0.499061	0.121	0.651	2.92e-13	1
Expression levels of cluster-specific marker genes in macrophage subtypes.	1.71e-17	0.4602	0.076	0.561	2.97e-13	1
Expression levels of cluster-specific marker genes in macrophage subtypes.	1.77e-17	0.790193	0.136	0.685	3.07e-13	1
Expression levels of cluster-specific marker genes in macrophage subtypes.	1.83e-17	0.439074	0.167	0.747	3.18e-13	1
Expression levels of cluster-specific marker genes in macrophage subtypes.	2.01e-17	0.407997	0.068	0.536	3.5e-13	1
Expression levels of cluster-specific marker genes in macrophage subtypes.	2.02e-17	0.632367	0.068	0.547	3.52e-13	1
Expression levels of cluster-specific marker genes in macrophage subtypes.	2.11e-17	0.555186	0.152	0.715	3.67e-13	1
Expression levels of cluster-specific marker genes in macrophage subtypes.	2.17e-17	0.400322	0.136	0.683	3.77e-13	1
Expression levels of cluster-specific marker genes in macrophage subtypes.	2.27e-17	0.352395	0.121	0.653	3.95e-13	1
Expression levels of cluster-specific marker genes in macrophage subtypes.	2.4e-17	0.541043	0.091	0.595	4.17e-13	1
Expression levels of cluster-specific marker genes in macrophage subtypes.	2.41e-17	0.507677	0.053	0.513	4.19e-13	1
Expression levels of cluster-specific marker genes in macrophage subtypes.	2.47e-17	0.609074	0.205	0.837	4.3e-13	1
Expression levels of cluster-specific marker genes in macrophage subtypes.	2.58e-17	0.262541	0.038	0.469	4.48e-13	1
Expression levels of cluster-specific marker genes in macrophage subtypes.	2.7e-17	0.297792	0.076	0.561	4.69e-13	1
Expression levels of cluster-specific marker genes in macrophage subtypes.	2.87e-17	0.465024	0.091	0.582	5e-13	1
Expression levels of cluster-specific marker genes in macrophage subtypes.	3.32e-17	0.263807	0.068	0.529	5.78e-13	1
Expression levels of cluster-specific marker genes in macrophage subtypes.	3.44e-17	0.613225	0.22	0.885	5.98e-13	1
Expression levels of cluster-specific marker genes in macrophage subtypes.	3.45e-17	0.439088	0.189	0.816	6e-13	1
Expression levels of cluster-specific marker genes in macrophage subtypes.	3.59e-17	0.296364	0.068	0.531	6.24e-13	1
Expression levels of cluster-specific marker genes in macrophage subtypes.	3.6e-17	0.517839	0.053	0.499	6.25e-13	1
Expression levels of cluster-specific marker genes in macrophage subtypes.	3.71e-17	0.350104	0.068	0.531	6.45e-13	1
Expression levels of cluster-specific marker genes in macrophage subtypes.	3.87e-17	0.559847	0.091	0.579	6.72e-13	1
Expression levels of cluster-specific marker genes in macrophage subtypes.	4.46e-17	0.633751	0.212	0.855	7.75e-13	1
Expression levels of cluster-specific marker genes in macrophage subtypes.	4.65e-17	0.697023	0.121	0.655	8.08e-13	1
Expression levels of cluster-specific marker genes in macrophage subtypes.	5.29e-17	0.259242	0.045	0.49	9.2e-13	1
Expression levels of cluster-specific marker genes in macrophage subtypes.	5.35e-17	0.277746	0.091	0.579	9.31e-13	1
Expression levels of cluster-specific marker genes in macrophage subtypes.	5.49e-17	0.660724	0.061	0.522	9.55e-13	1
Expression levels of cluster-specific marker genes in macrophage subtypes.	5.5e-17	0.516763	0.053	0.506	9.56e-13	1
Expression levels of cluster-specific marker genes in macrophage subtypes.	5.56e-17	0.506102	0.212	0.86	9.67e-13	1
Expression levels of cluster-specific marker genes in macrophage subtypes.	5.68e-17	0.453215	0.152	0.71	9.87e-13	1
Expression levels of cluster-specific marker genes in macrophage subtypes.	5.83e-17	0.548252	0.129	0.653	1.01e-12	1
Expression levels of cluster-specific marker genes in macrophage subtypes.	6.03e-17	0.557689	0.121	0.639	1.05e-12	1
Expression levels of cluster-specific marker genes in macrophage subtypes.	6.75e-17	0.297627	0.076	0.543	1.17e-12	1
Expression levels of cluster-specific marker genes in macrophage subtypes.	6.96e-17	0.545874	0.083	0.57	1.21e-12	1
Expression levels of cluster-specific marker genes in macrophage subtypes.	7.83e-17	0.527705	0.121	0.641	1.36e-12	1
Expression levels of cluster-specific marker genes in macrophage subtypes.	1.01e-16	0.402985	0.061	0.517	1.76e-12	1
Expression levels of cluster-specific marker genes in macrophage subtypes.	1.2e-16	0.371656	0.061	0.515	2.09e-12	1
Expression levels of cluster-specific marker genes in macrophage subtypes.	1.27e-16	0.453494	0.053	0.499	2.21e-12	1
Expression levels of cluster-specific marker genes in macrophage subtypes.	1.3e-16	0.584374	0.174	0.747	2.25e-12	1
Expression levels of cluster-specific marker genes in macrophage subtypes.	1.34e-16	0.617654	0.212	0.851	2.33e-12	1
Expression levels of cluster-specific marker genes in macrophage subtypes.	1.42e-16	0.337928	0.083	0.563	2.47e-12	1
Expression levels of cluster-specific marker genes in macrophage subtypes.	1.43e-16	0.41544	0.053	0.487	2.49e-12	1
Expression levels of cluster-specific marker genes in macrophage subtypes.	1.58e-16	0.418951	0.235	0.864	2.74e-12	1
Expression levels of cluster-specific marker genes in macrophage subtypes.	1.6e-16	0.251256	0.045	0.48	2.77e-12	1
Expression levels of cluster-specific marker genes in macrophage subtypes.	1.61e-16	0.508858	0.121	0.644	2.79e-12	1
Expression levels of cluster-specific marker genes in macrophage subtypes.	1.79e-16	0.312078	0.023	0.43	3.11e-12	1
Expression levels of cluster-specific marker genes in macrophage subtypes.	1.96e-16	0.316255	0.061	0.501	3.42e-12	1
Expression levels of cluster-specific marker genes in macrophage subtypes.	2.52e-16	0.359706	0.235	0.885	4.38e-12	1
Expression levels of cluster-specific marker genes in macrophage subtypes.	2.53e-16	0.351128	0.061	0.499	4.4e-12	1
Expression levels of cluster-specific marker genes in macrophage subtypes.	2.53e-16	0.349195	0.061	0.499	4.4e-12	1
Expression levels of cluster-specific marker genes in macrophage subtypes.	2.57e-16	0.401771	0.083	0.556	4.47e-12	1
Expression levels of cluster-specific marker genes in macrophage subtypes.	2.67e-16	0.411184	0.227	0.862	4.64e-12	1
Expression levels of cluster-specific marker genes in macrophage subtypes.	2.8e-16	0.551791	0.068	0.524	4.86e-12	1
Expression levels of cluster-specific marker genes in macrophage subtypes.	2.92e-16	0.419716	0.167	0.738	5.08e-12	1
Expression levels of cluster-specific marker genes in macrophage subtypes.	3.11e-16	0.426362	0.068	0.524	5.41e-12	1
Expression levels of cluster-specific marker genes in macrophage subtypes.	3.26e-16	0.264916	0.038	0.448	5.66e-12	1
Expression levels of cluster-specific marker genes in macrophage subtypes.	3.45e-16	0.33622	0.038	0.457	6e-12	1
Expression levels of cluster-specific marker genes in macrophage subtypes.	4.23e-16	0.693002	0.22	0.855	7.35e-12	1
Expression levels of cluster-specific marker genes in macrophage subtypes.	4.53e-16	0.322562	0.038	0.455	7.87e-12	1
Expression levels of cluster-specific marker genes in macrophage subtypes.	4.69e-16	0.321089	0.045	0.471	8.15e-12	1
Expression levels of cluster-specific marker genes in macrophage subtypes.	5.37e-16	0.27278	0.227	0.853	9.34e-12	1
Expression levels of cluster-specific marker genes in macrophage subtypes.	5.53e-16	0.338612	0.061	0.492	9.62e-12	1
Expression levels of cluster-specific marker genes in macrophage subtypes.	5.68e-16	0.358383	0.083	0.54	9.88e-12	1
Expression levels of cluster-specific marker genes in macrophage subtypes.	5.71e-16	0.662615	0.098	0.572	9.93e-12	1
Expression levels of cluster-specific marker genes in macrophage subtypes.	5.71e-16	0.471935	0.076	0.524	9.93e-12	1
Expression levels of cluster-specific marker genes in macrophage subtypes.	5.8e-16	0.706331	0.121	0.621	1.01e-11	1
Expression levels of cluster-specific marker genes in macrophage subtypes.	5.86e-16	0.377392	0.038	0.453	1.02e-11	1
Expression levels of cluster-specific marker genes in macrophage subtypes.	6.79e-16	0.540015	0.106	0.589	1.18e-11	1
Expression levels of cluster-specific marker genes in macrophage subtypes.	8.06e-16	0.367263	0.242	0.878	1.4e-11	1
Expression levels of cluster-specific marker genes in macrophage subtypes.	8.71e-16	0.476047	0.053	0.474	1.51e-11	1
Expression levels of cluster-specific marker genes in macrophage subtypes.	8.89e-16	0.30556	0.159	0.69	1.55e-11	1
Expression levels of cluster-specific marker genes in macrophage subtypes.	9.31e-16	0.376236	0.106	0.595	1.62e-11	1
Expression levels of cluster-specific marker genes in macrophage subtypes.	9.97e-16	0.309941	0.197	0.784	1.73e-11	1
Expression levels of cluster-specific marker genes in macrophage subtypes.	1e-15	0.253253	0.053	0.471	1.74e-11	1
Expression levels of cluster-specific marker genes in macrophage subtypes.	1.05e-15	0.667827	0.091	0.552	1.82e-11	1
Expression levels of cluster-specific marker genes in macrophage subtypes.	1.31e-15	0.580568	0.121	0.625	2.28e-11	1
Expression levels of cluster-specific marker genes in macrophage subtypes.	1.31e-15	0.31187	0.061	0.485	2.28e-11	1
Expression levels of cluster-specific marker genes in macrophage subtypes.	1.33e-15	0.447822	0.053	0.469	2.31e-11	1
Expression levels of cluster-specific marker genes in macrophage subtypes.	1.42e-15	0.307568	0.258	0.92	2.47e-11	1
Expression levels of cluster-specific marker genes in macrophage subtypes.	1.46e-15	0.270643	0.273	0.949	2.53e-11	1
Expression levels of cluster-specific marker genes in macrophage subtypes.	1.76e-15	0.447766	0.091	0.547	3.07e-11	1
Expression levels of cluster-specific marker genes in macrophage subtypes.	1.85e-15	0.385745	0.068	0.503	3.21e-11	1
Expression levels of cluster-specific marker genes in macrophage subtypes.	1.88e-15	0.560443	0.197	0.782	3.27e-11	1
Expression levels of cluster-specific marker genes in macrophage subtypes.	1.89e-15	0.276747	0.121	0.607	3.29e-11	1
Expression levels of cluster-specific marker genes in macrophage subtypes.	1.92e-15	0.308183	0.068	0.508	3.33e-11	1
Expression levels of cluster-specific marker genes in macrophage subtypes.	1.99e-15	0.46608	0.136	0.644	3.46e-11	1
Expression levels of cluster-specific marker genes in macrophage subtypes.	2.21e-15	0.419488	0.053	0.474	3.85e-11	1
Expression levels of cluster-specific marker genes in macrophage subtypes.	2.49e-15	0.639426	0.121	0.618	4.33e-11	1
Expression levels of cluster-specific marker genes in macrophage subtypes.	2.64e-15	0.411891	0.076	0.522	4.6e-11	1
Expression levels of cluster-specific marker genes in macrophage subtypes.	2.76e-15	0.548878	0.076	0.522	4.8e-11	1
Expression levels of cluster-specific marker genes in macrophage subtypes.	2.83e-15	0.336633	0.038	0.439	4.92e-11	1
Expression levels of cluster-specific marker genes in macrophage subtypes.	2.95e-15	0.272697	0.053	0.462	5.12e-11	1
Expression levels of cluster-specific marker genes in macrophage subtypes.	3.25e-15	0.34031	0.136	0.637	5.65e-11	1
Expression levels of cluster-specific marker genes in macrophage subtypes.	3.31e-15	0.345617	0.061	0.487	5.75e-11	1
Expression levels of cluster-specific marker genes in macrophage subtypes.	3.5e-15	0.369553	0.076	0.515	6.09e-11	1
Expression levels of cluster-specific marker genes in macrophage subtypes.	3.66e-15	0.302029	0.053	0.46	6.36e-11	1
Expression levels of cluster-specific marker genes in macrophage subtypes.	3.73e-15	0.388562	0.083	0.536	6.49e-11	1
Expression levels of cluster-specific marker genes in macrophage subtypes.	3.87e-15	0.263204	0.053	0.46	6.73e-11	1
Expression levels of cluster-specific marker genes in macrophage subtypes.	3.98e-15	0.324251	0.053	0.469	6.93e-11	1
Expression levels of cluster-specific marker genes in macrophage subtypes.	5.48e-15	0.372373	0.061	0.471	9.53e-11	1
Expression levels of cluster-specific marker genes in macrophage subtypes.	5.48e-15	0.525123	0.076	0.503	9.53e-11	1
Expression levels of cluster-specific marker genes in macrophage subtypes.	5.53e-15	0.4296	0.265	0.924	9.62e-11	1
Expression levels of cluster-specific marker genes in macrophage subtypes.	6.38e-15	0.596138	0.25	0.887	1.11e-10	1
Expression levels of cluster-specific marker genes in macrophage subtypes.	6.82e-15	0.253139	0.068	0.492	1.19e-10	1
Expression levels of cluster-specific marker genes in macrophage subtypes.	7.37e-15	0.56635	0.114	0.591	1.28e-10	1
Expression levels of cluster-specific marker genes in macrophage subtypes.	8.07e-15	0.375496	0.03	0.414	1.4e-10	1
Expression levels of cluster-specific marker genes in macrophage subtypes.	8.23e-15	0.369659	0.068	0.485	1.43e-10	1
Expression levels of cluster-specific marker genes in macrophage subtypes.	8.33e-15	0.48128	0.136	0.641	1.45e-10	1
Expression levels of cluster-specific marker genes in macrophage subtypes.	8.38e-15	0.420406	0.076	0.501	1.46e-10	1
Expression levels of cluster-specific marker genes in macrophage subtypes.	8.53e-15	0.373701	0.053	0.453	1.48e-10	1
Expression levels of cluster-specific marker genes in macrophage subtypes.	8.65e-15	0.425995	0.061	0.469	1.5e-10	1
Expression levels of cluster-specific marker genes in macrophage subtypes.	8.66e-15	0.280954	0.091	0.533	1.51e-10	1
Expression levels of cluster-specific marker genes in macrophage subtypes.	8.96e-15	0.632477	0.098	0.549	1.56e-10	1
Expression levels of cluster-specific marker genes in macrophage subtypes.	9.15e-15	0.367387	0.061	0.478	1.59e-10	1
Expression levels of cluster-specific marker genes in macrophage subtypes.	1.1e-14	0.346383	0.045	0.434	1.92e-10	1
Expression levels of cluster-specific marker genes in macrophage subtypes.	1.11e-14	0.253172	0.038	0.418	1.93e-10	1
Expression levels of cluster-specific marker genes in macrophage subtypes.	1.12e-14	0.460683	0.076	0.499	1.95e-10	1
Expression levels of cluster-specific marker genes in macrophage subtypes.	1.14e-14	0.294161	0.076	0.499	1.98e-10	1
Expression levels of cluster-specific marker genes in macrophage subtypes.	1.23e-14	0.300361	0.129	0.616	2.15e-10	1
Expression levels of cluster-specific marker genes in macrophage subtypes.	1.24e-14	0.276764	0.068	0.492	2.16e-10	1
Expression levels of cluster-specific marker genes in macrophage subtypes.	1.34e-14	0.381745	0.136	0.623	2.33e-10	1
Expression levels of cluster-specific marker genes in macrophage subtypes.	1.39e-14	0.475448	0.091	0.54	2.42e-10	1
Expression levels of cluster-specific marker genes in macrophage subtypes.	1.44e-14	0.254299	0.045	0.441	2.51e-10	1
Expression levels of cluster-specific marker genes in macrophage subtypes.	1.83e-14	0.337986	0.038	0.423	3.19e-10	1
Expression levels of cluster-specific marker genes in macrophage subtypes.	1.83e-14	0.329899	0.038	0.423	3.19e-10	1
Expression levels of cluster-specific marker genes in macrophage subtypes.	2.03e-14	0.256831	0.061	0.46	3.53e-10	1
Expression levels of cluster-specific marker genes in macrophage subtypes.	2.08e-14	0.553547	0.068	0.487	3.62e-10	1
Expression levels of cluster-specific marker genes in macrophage subtypes.	2.28e-14	0.327409	0.03	0.405	3.96e-10	1
Expression levels of cluster-specific marker genes in macrophage subtypes.	2.47e-14	0.536371	0.091	0.524	4.29e-10	1
Expression levels of cluster-specific marker genes in macrophage subtypes.	2.52e-14	0.461297	0.083	0.506	4.39e-10	1
Expression levels of cluster-specific marker genes in macrophage subtypes.	2.53e-14	0.58651	0.053	0.453	4.4e-10	1
Expression levels of cluster-specific marker genes in macrophage subtypes.	3.07e-14	0.39006	0.076	0.497	5.33e-10	1
Expression levels of cluster-specific marker genes in macrophage subtypes.	3.13e-14	0.411689	0.068	0.476	5.44e-10	1
Expression levels of cluster-specific marker genes in macrophage subtypes.	3.34e-14	0.493103	0.061	0.467	5.81e-10	1
Expression levels of cluster-specific marker genes in macrophage subtypes.	3.49e-14	0.508223	0.091	0.52	6.07e-10	1
Expression levels of cluster-specific marker genes in macrophage subtypes.	3.7e-14	0.758921	0.098	0.547	6.44e-10	1
Expression levels of cluster-specific marker genes in macrophage subtypes.	3.8e-14	0.329394	0.129	0.6	6.61e-10	1
Expression levels of cluster-specific marker genes in macrophage subtypes.	4.09e-14	0.622081	0.227	0.807	7.11e-10	1
Expression levels of cluster-specific marker genes in macrophage subtypes.	4.23e-14	0.370113	0.045	0.43	7.35e-10	1
Expression levels of cluster-specific marker genes in macrophage subtypes.	4.32e-14	0.350912	0.061	0.464	7.52e-10	1
Expression levels of cluster-specific marker genes in macrophage subtypes.	4.44e-14	0.704552	0.076	0.497	7.72e-10	1
Expression levels of cluster-specific marker genes in macrophage subtypes.	4.72e-14	0.405915	0.091	0.515	8.21e-10	1
Expression levels of cluster-specific marker genes in macrophage subtypes.	5.1e-14	0.631557	0.106	0.559	8.86e-10	1
Expression levels of cluster-specific marker genes in macrophage subtypes.	5.26e-14	0.293075	0.038	0.405	9.15e-10	1
Expression levels of cluster-specific marker genes in macrophage subtypes.	5.31e-14	3.12772	0.773	0.986	9.24e-10	1
Expression levels of cluster-specific marker genes in macrophage subtypes.	5.53e-14	0.420137	0.098	0.543	9.62e-10	1
Expression levels of cluster-specific marker genes in macrophage subtypes.	5.56e-14	0.366359	0.061	0.462	9.67e-10	1
Expression levels of cluster-specific marker genes in macrophage subtypes.	5.81e-14	0.837789	0.159	0.662	1.01e-09	1
Expression levels of cluster-specific marker genes in macrophage subtypes.	6.38e-14	0.576442	0.25	0.86	1.11e-09	1
Expression levels of cluster-specific marker genes in macrophage subtypes.	6.4e-14	0.37334	0.061	0.451	1.11e-09	1
Expression levels of cluster-specific marker genes in macrophage subtypes.	6.58e-14	0.326597	0.076	0.492	1.14e-09	1
Expression levels of cluster-specific marker genes in macrophage subtypes.	6.85e-14	0.327126	0.061	0.46	1.19e-09	1
Expression levels of cluster-specific marker genes in macrophage subtypes.	7.09e-14	0.387716	0.098	0.529	1.23e-09	1
Expression levels of cluster-specific marker genes in macrophage subtypes.	7.41e-14	0.336673	0.045	0.425	1.29e-09	1
Expression levels of cluster-specific marker genes in macrophage subtypes.	8.67e-14	0.647473	0.212	0.766	1.51e-09	1
Expression levels of cluster-specific marker genes in macrophage subtypes.	8.82e-14	0.286326	0.038	0.4	1.53e-09	1
Expression levels of cluster-specific marker genes in macrophage subtypes.	9.84e-14	0.369656	0.28	0.929	1.71e-09	1
Expression levels of cluster-specific marker genes in macrophage subtypes.	1.07e-13	0.271174	0.068	0.462	1.85e-09	1
Expression levels of cluster-specific marker genes in macrophage subtypes.	1.07e-13	0.324449	0.045	0.423	1.87e-09	1
Expression levels of cluster-specific marker genes in macrophage subtypes.	1.14e-13	0.251859	0.045	0.414	1.98e-09	1
Expression levels of cluster-specific marker genes in macrophage subtypes.	1.28e-13	0.304483	0.083	0.492	2.23e-09	1
Expression levels of cluster-specific marker genes in macrophage subtypes.	1.35e-13	0.264922	0.03	0.389	2.35e-09	1
Expression levels of cluster-specific marker genes in macrophage subtypes.	1.38e-13	0.25316	0.045	0.421	2.4e-09	1
Expression levels of cluster-specific marker genes in macrophage subtypes.	1.38e-13	0.321158	0.053	0.437	2.41e-09	1
Expression levels of cluster-specific marker genes in macrophage subtypes.	1.45e-13	0.453297	0.061	0.444	2.51e-09	1
Expression levels of cluster-specific marker genes in macrophage subtypes.	1.72e-13	0.380206	0.205	0.731	2.99e-09	1
Expression levels of cluster-specific marker genes in macrophage subtypes.	1.8e-13	0.257047	0.235	0.823	3.13e-09	1
Expression levels of cluster-specific marker genes in macrophage subtypes.	1.83e-13	0.296624	0.045	0.418	3.18e-09	1
Expression levels of cluster-specific marker genes in macrophage subtypes.	1.89e-13	0.361732	0.053	0.434	3.29e-09	1
Expression levels of cluster-specific marker genes in macrophage subtypes.	2.16e-13	0.564545	0.091	0.503	3.75e-09	1
Expression levels of cluster-specific marker genes in macrophage subtypes.	2.18e-13	0.334776	0.068	0.455	3.79e-09	1
Expression levels of cluster-specific marker genes in macrophage subtypes.	2.31e-13	0.284141	0.038	0.4	4.02e-09	1
Expression levels of cluster-specific marker genes in macrophage subtypes.	2.38e-13	0.579821	0.068	0.455	4.14e-09	1
Expression levels of cluster-specific marker genes in macrophage subtypes.	2.39e-13	0.256732	0.045	0.407	4.15e-09	1
Expression levels of cluster-specific marker genes in macrophage subtypes.	2.61e-13	0.459208	0.083	0.497	4.53e-09	1
Expression levels of cluster-specific marker genes in macrophage subtypes.	2.74e-13	0.537707	0.03	0.382	4.77e-09	1
Expression levels of cluster-specific marker genes in macrophage subtypes.	2.85e-13	0.277546	0.083	0.494	4.96e-09	1
Expression levels of cluster-specific marker genes in macrophage subtypes.	2.88e-13	0.315481	0.053	0.43	5e-09	1
Expression levels of cluster-specific marker genes in macrophage subtypes.	3.01e-13	0.256607	0.061	0.437	5.23e-09	1
Expression levels of cluster-specific marker genes in macrophage subtypes.	3.03e-13	0.621544	0.068	0.453	5.26e-09	1
Expression levels of cluster-specific marker genes in macrophage subtypes.	3.07e-13	0.489924	0.121	0.57	5.33e-09	1
Expression levels of cluster-specific marker genes in macrophage subtypes.	3.29e-13	0.878908	0.121	0.566	5.71e-09	1
Expression levels of cluster-specific marker genes in macrophage subtypes.	3.34e-13	0.620463	0.159	0.648	5.8e-09	1
Expression levels of cluster-specific marker genes in macrophage subtypes.	3.36e-13	0.369775	0.076	0.476	5.85e-09	1
Expression levels of cluster-specific marker genes in macrophage subtypes.	3.67e-13	0.385814	0.038	0.395	6.38e-09	1
Expression levels of cluster-specific marker genes in macrophage subtypes.	4.43e-13	0.359558	0.038	0.393	7.7e-09	1
Expression levels of cluster-specific marker genes in macrophage subtypes.	4.69e-13	0.422622	0.068	0.448	8.15e-09	1
Expression levels of cluster-specific marker genes in macrophage subtypes.	4.91e-13	0.330135	0.068	0.448	8.54e-09	1
Expression levels of cluster-specific marker genes in macrophage subtypes.	5.55e-13	0.523063	0.068	0.446	9.65e-09	1
Expression levels of cluster-specific marker genes in macrophage subtypes.	5.72e-13	0.278297	0.053	0.423	9.95e-09	1
Expression levels of cluster-specific marker genes in macrophage subtypes.	6.21e-13	0.317026	0.038	0.391	1.08e-08	1
Expression levels of cluster-specific marker genes in macrophage subtypes.	6.33e-13	0.261718	0.053	0.423	1.1e-08	1
Expression levels of cluster-specific marker genes in macrophage subtypes.	6.52e-13	0.455823	0.061	0.434	1.13e-08	1
Expression levels of cluster-specific marker genes in macrophage subtypes.	6.58e-13	0.323998	0.045	0.398	1.14e-08	1
Expression levels of cluster-specific marker genes in macrophage subtypes.	7.2e-13	1.3236	0.235	0.807	1.25e-08	1
Expression levels of cluster-specific marker genes in macrophage subtypes.	7.33e-13	0.734392	0.076	0.469	1.27e-08	1
Expression levels of cluster-specific marker genes in macrophage subtypes.	7.65e-13	0.320692	0.053	0.421	1.33e-08	1
Expression levels of cluster-specific marker genes in macrophage subtypes.	7.93e-13	0.414975	0.038	0.389	1.38e-08	1
Expression levels of cluster-specific marker genes in macrophage subtypes.	8.23e-13	0.50671	0.061	0.437	1.43e-08	1
Expression levels of cluster-specific marker genes in macrophage subtypes.	8.24e-13	0.586612	0.053	0.421	1.43e-08	1
Expression levels of cluster-specific marker genes in macrophage subtypes.	8.59e-13	0.286612	0.038	0.379	1.49e-08	1
Expression levels of cluster-specific marker genes in macrophage subtypes.	1.08e-12	0.370144	0.053	0.409	1.88e-08	1
Expression levels of cluster-specific marker genes in macrophage subtypes.	1.12e-12	0.838057	0.091	0.499	1.96e-08	1
Expression levels of cluster-specific marker genes in macrophage subtypes.	1.26e-12	0.374927	0.03	0.368	2.19e-08	1
Expression levels of cluster-specific marker genes in macrophage subtypes.	1.26e-12	0.672606	0.182	0.676	2.19e-08	1
Expression levels of cluster-specific marker genes in macrophage subtypes.	1.41e-12	0.285201	0.03	0.359	2.45e-08	1
Expression levels of cluster-specific marker genes in macrophage subtypes.	1.6e-12	0.256388	0.03	0.366	2.79e-08	1
Expression levels of cluster-specific marker genes in macrophage subtypes.	1.65e-12	0.487387	0.061	0.43	2.87e-08	1
Expression levels of cluster-specific marker genes in macrophage subtypes.	2.12e-12	0.509799	0.045	0.395	3.69e-08	1
Expression levels of cluster-specific marker genes in macrophage subtypes.	2.14e-12	0.367791	0.061	0.418	3.72e-08	1
Expression levels of cluster-specific marker genes in macrophage subtypes.	2.18e-12	0.613974	0.061	0.428	3.79e-08	1
Expression levels of cluster-specific marker genes in macrophage subtypes.	2.19e-12	0.27409	0.061	0.418	3.8e-08	1
Expression levels of cluster-specific marker genes in macrophage subtypes.	2.3e-12	0.256661	0.083	0.474	3.99e-08	1
Expression levels of cluster-specific marker genes in macrophage subtypes.	2.32e-12	0.284645	0.053	0.409	4.03e-08	1
Expression levels of cluster-specific marker genes in macrophage subtypes.	2.51e-12	0.336436	0.023	0.345	4.37e-08	1
Expression levels of cluster-specific marker genes in macrophage subtypes.	2.55e-12	0.32073	0.076	0.448	4.43e-08	1
Expression levels of cluster-specific marker genes in macrophage subtypes.	2.74e-12	0.291156	0.061	0.416	4.77e-08	1
Expression levels of cluster-specific marker genes in macrophage subtypes.	2.74e-12	0.371961	0.061	0.416	4.77e-08	1
Expression levels of cluster-specific marker genes in macrophage subtypes.	2.87e-12	0.291077	0.053	0.4	4.98e-08	1
Expression levels of cluster-specific marker genes in macrophage subtypes.	3.03e-12	1.28338	0.167	0.655	5.27e-08	1
Expression levels of cluster-specific marker genes in macrophage subtypes.	3.14e-12	0.323551	0.076	0.446	5.46e-08	1
Expression levels of cluster-specific marker genes in macrophage subtypes.	3.56e-12	0.49293	0.061	0.414	6.19e-08	1
Expression levels of cluster-specific marker genes in macrophage subtypes.	3.64e-12	0.290587	0.045	0.382	6.33e-08	1
Expression levels of cluster-specific marker genes in macrophage subtypes.	5.34e-12	0.568947	0.189	0.676	9.29e-08	1
Expression levels of cluster-specific marker genes in macrophage subtypes.	5.34e-12	0.424116	0.03	0.354	9.29e-08	1
Expression levels of cluster-specific marker genes in macrophage subtypes.	5.34e-12	0.256447	0.03	0.354	9.29e-08	1
Expression levels of cluster-specific marker genes in macrophage subtypes.	5.64e-12	0.519239	0.136	0.572	9.81e-08	1
Expression levels of cluster-specific marker genes in macrophage subtypes.	6.05e-12	0.73325	0.083	0.464	1.05e-07	1
Expression levels of cluster-specific marker genes in macrophage subtypes.	6.15e-12	0.280997	0.03	0.345	1.07e-07	1
Expression levels of cluster-specific marker genes in macrophage subtypes.	6.66e-12	0.892516	0.106	0.503	1.16e-07	1
Expression levels of cluster-specific marker genes in macrophage subtypes.	6.78e-12	0.411587	0.03	0.352	1.18e-07	1
Expression levels of cluster-specific marker genes in macrophage subtypes.	6.78e-12	0.318952	0.03	0.352	1.18e-07	1
Expression levels of cluster-specific marker genes in macrophage subtypes.	6.87e-12	0.488363	0.068	0.432	1.19e-07	1
Expression levels of cluster-specific marker genes in macrophage subtypes.	6.89e-12	0.336596	0.038	0.368	1.2e-07	1
Expression levels of cluster-specific marker genes in macrophage subtypes.	6.98e-12	0.489585	0.053	0.4	1.21e-07	1
Expression levels of cluster-specific marker genes in macrophage subtypes.	7.11e-12	0.469384	0.068	0.432	1.24e-07	1
Expression levels of cluster-specific marker genes in macrophage subtypes.	7.5e-12	0.475362	0.083	0.462	1.3e-07	1
Expression levels of cluster-specific marker genes in macrophage subtypes.	7.51e-12	0.890912	0.159	0.625	1.31e-07	1
Expression levels of cluster-specific marker genes in macrophage subtypes.	7.65e-12	0.816921	0.25	0.825	1.33e-07	1
Expression levels of cluster-specific marker genes in macrophage subtypes.	7.73e-12	0.538771	0.28	0.887	1.34e-07	1
Expression levels of cluster-specific marker genes in macrophage subtypes.	7.93e-12	0.257961	0.076	0.437	1.38e-07	1
Expression levels of cluster-specific marker genes in macrophage subtypes.	9.6e-12	0.579258	0.121	0.538	1.67e-07	1
Expression levels of cluster-specific marker genes in macrophage subtypes.	9.64e-12	0.258329	0.045	0.372	1.68e-07	1
Expression levels of cluster-specific marker genes in macrophage subtypes.	1.06e-11	0.48728	0.152	0.598	1.85e-07	1
Expression levels of cluster-specific marker genes in macrophage subtypes.	1.09e-11	0.38299	0.053	0.395	1.89e-07	1
Expression levels of cluster-specific marker genes in macrophage subtypes.	1.13e-11	0.254374	0.038	0.354	1.96e-07	1
Expression levels of cluster-specific marker genes in macrophage subtypes.	1.14e-11	0.565341	0.182	0.655	1.98e-07	1
Expression levels of cluster-specific marker genes in macrophage subtypes.	1.27e-11	0.268012	0.038	0.354	2.21e-07	1
Expression levels of cluster-specific marker genes in macrophage subtypes.	1.28e-11	0.441435	0.068	0.423	2.22e-07	1
Expression levels of cluster-specific marker genes in macrophage subtypes.	1.4e-11	0.410317	0.038	0.361	2.44e-07	1
Expression levels of cluster-specific marker genes in macrophage subtypes.	1.43e-11	0.337559	0.053	0.384	2.48e-07	1
Expression levels of cluster-specific marker genes in macrophage subtypes.	1.44e-11	0.749784	0.106	0.506	2.51e-07	1
Expression levels of cluster-specific marker genes in macrophage subtypes.	1.57e-11	0.381711	0.045	0.368	2.73e-07	1
Expression levels of cluster-specific marker genes in macrophage subtypes.	1.58e-11	0.671726	0.106	0.494	2.74e-07	1
Expression levels of cluster-specific marker genes in macrophage subtypes.	1.64e-11	0.600027	0.061	0.407	2.85e-07	1
Expression levels of cluster-specific marker genes in macrophage subtypes.	1.74e-11	0.692621	0.955	1	3.03e-07	1
Expression levels of cluster-specific marker genes in macrophage subtypes.	1.77e-11	0.410641	0.038	0.359	3.08e-07	1
Expression levels of cluster-specific marker genes in macrophage subtypes.	1.85e-11	0.316416	0.053	0.382	3.22e-07	1
Expression levels of cluster-specific marker genes in macrophage subtypes.	1.96e-11	0.513786	0.038	0.349	3.41e-07	1
Expression levels of cluster-specific marker genes in macrophage subtypes.	1.99e-11	0.585153	0.235	0.733	3.46e-07	1
Expression levels of cluster-specific marker genes in macrophage subtypes.	2.05e-11	0.750824	0.205	0.717	3.57e-07	1
Expression levels of cluster-specific marker genes in macrophage subtypes.	2.06e-11	0.778638	0.091	0.46	3.58e-07	1
Expression levels of cluster-specific marker genes in macrophage subtypes.	2.14e-11	0.33336	0.03	0.34	3.71e-07	1
Expression levels of cluster-specific marker genes in macrophage subtypes.	2.18e-11	0.399315	0.053	0.389	3.79e-07	1
Expression levels of cluster-specific marker genes in macrophage subtypes.	2.24e-11	0.31375	0.038	0.356	3.89e-07	1
Expression levels of cluster-specific marker genes in macrophage subtypes.	2.25e-11	0.445225	0.045	0.372	3.92e-07	1
Expression levels of cluster-specific marker genes in macrophage subtypes.	2.31e-11	0.335723	0.068	0.411	4.02e-07	1
Expression levels of cluster-specific marker genes in macrophage subtypes.	2.52e-11	0.475973	0.091	0.457	4.39e-07	1
Expression levels of cluster-specific marker genes in macrophage subtypes.	2.76e-11	0.68937	0.091	0.467	4.81e-07	1
Expression levels of cluster-specific marker genes in macrophage subtypes.	3.05e-11	0.82715	0.091	0.455	5.3e-07	1
Expression levels of cluster-specific marker genes in macrophage subtypes.	3.15e-11	0.306413	0.045	0.361	5.48e-07	1
Expression levels of cluster-specific marker genes in macrophage subtypes.	3.2e-11	0.445579	0.045	0.361	5.57e-07	1
Expression levels of cluster-specific marker genes in macrophage subtypes.	3.24e-11	0.684303	0.129	0.538	5.64e-07	1
Expression levels of cluster-specific marker genes in macrophage subtypes.	3.41e-11	0.390489	0.045	0.368	5.94e-07	1
Expression levels of cluster-specific marker genes in macrophage subtypes.	3.56e-11	0.382344	0.038	0.352	6.19e-07	1
Expression levels of cluster-specific marker genes in macrophage subtypes.	3.81e-11	0.255957	0.068	0.405	6.63e-07	1
Expression levels of cluster-specific marker genes in macrophage subtypes.	4.15e-11	0.368224	0.045	0.359	7.22e-07	1
Expression levels of cluster-specific marker genes in macrophage subtypes.	4.17e-11	0.391406	0.03	0.326	7.26e-07	1
Expression levels of cluster-specific marker genes in macrophage subtypes.	4.3e-11	0.887379	0.129	0.543	7.47e-07	1
Expression levels of cluster-specific marker genes in macrophage subtypes.	4.37e-11	0.273858	0.038	0.349	7.6e-07	1
Expression levels of cluster-specific marker genes in macrophage subtypes.	4.38e-11	0.563235	0.083	0.444	7.62e-07	1
Expression levels of cluster-specific marker genes in macrophage subtypes.	4.4e-11	0.468968	0.053	0.382	7.65e-07	1
Expression levels of cluster-specific marker genes in macrophage subtypes.	4.49e-11	0.435095	0.053	0.382	7.8e-07	1
Expression levels of cluster-specific marker genes in macrophage subtypes.	4.89e-11	0.390452	0.008	0.283	8.51e-07	1
Expression levels of cluster-specific marker genes in macrophage subtypes.	5.1e-11	0.645264	0.106	0.48	8.87e-07	1
Expression levels of cluster-specific marker genes in macrophage subtypes.	5.14e-11	0.353661	0.318	0.929	8.93e-07	1
Expression levels of cluster-specific marker genes in macrophage subtypes.	5.3e-11	0.558079	0.174	0.625	9.21e-07	1
Expression levels of cluster-specific marker genes in macrophage subtypes.	5.54e-11	0.613985	0.061	0.395	9.63e-07	1
Expression levels of cluster-specific marker genes in macrophage subtypes.	5.55e-11	0.316415	0.326	0.945	9.64e-07	1
Expression levels of cluster-specific marker genes in macrophage subtypes.	6.59e-11	0.282462	0.076	0.414	1.15e-06	1
Expression levels of cluster-specific marker genes in macrophage subtypes.	7.09e-11	0.278443	0.038	0.345	1.23e-06	1
Expression levels of cluster-specific marker genes in macrophage subtypes.	7.1e-11	0.494891	0.045	0.361	1.23e-06	1
Expression levels of cluster-specific marker genes in macrophage subtypes.	7.19e-11	0.474256	0.068	0.4	1.25e-06	1
Expression levels of cluster-specific marker genes in macrophage subtypes.	8.22e-11	0.324237	0.038	0.336	1.43e-06	1
Expression levels of cluster-specific marker genes in macrophage subtypes.	8.34e-11	0.453737	0.045	0.359	1.45e-06	1
Expression levels of cluster-specific marker genes in macrophage subtypes.	8.73e-11	0.339105	0.038	0.343	1.52e-06	1
Expression levels of cluster-specific marker genes in macrophage subtypes.	8.82e-11	0.306785	0.038	0.343	1.53e-06	1
Expression levels of cluster-specific marker genes in macrophage subtypes.	8.9e-11	0.416558	0.326	0.956	1.55e-06	1
Expression levels of cluster-specific marker genes in macrophage subtypes.	8.91e-11	0.374533	0.038	0.343	1.55e-06	1
Expression levels of cluster-specific marker genes in macrophage subtypes.	8.98e-11	0.520451	0.303	0.922	1.56e-06	1
Expression levels of cluster-specific marker genes in macrophage subtypes.	9.8e-11	0.459239	0.008	0.276	1.7e-06	1
Expression levels of cluster-specific marker genes in macrophage subtypes.	1.03e-10	0.542935	0.28	0.862	1.79e-06	1
Expression levels of cluster-specific marker genes in macrophage subtypes.	1.06e-10	0.85215	0.273	0.841	1.85e-06	1
Expression levels of cluster-specific marker genes in macrophage subtypes.	1.12e-10	0.35272	0.045	0.356	1.94e-06	1
Expression levels of cluster-specific marker genes in macrophage subtypes.	1.12e-10	0.3273	0.038	0.34	1.94e-06	1
Expression levels of cluster-specific marker genes in macrophage subtypes.	1.12e-10	0.250971	0.038	0.34	1.94e-06	1
Expression levels of cluster-specific marker genes in macrophage subtypes.	1.26e-10	0.754665	0.114	0.49	2.19e-06	1
Expression levels of cluster-specific marker genes in macrophage subtypes.	1.4e-10	0.350486	0.038	0.338	2.44e-06	1
Expression levels of cluster-specific marker genes in macrophage subtypes.	1.56e-10	0.385179	0.053	0.361	2.71e-06	1
Expression levels of cluster-specific marker genes in macrophage subtypes.	1.62e-10	0.365399	0.053	0.361	2.82e-06	1
Expression levels of cluster-specific marker genes in macrophage subtypes.	1.63e-10	0.581141	0.167	0.602	2.83e-06	1
Expression levels of cluster-specific marker genes in macrophage subtypes.	1.82e-10	0.595672	0.061	0.375	3.17e-06	1
Expression levels of cluster-specific marker genes in macrophage subtypes.	1.97e-10	0.443332	0.091	0.434	3.42e-06	1
Expression levels of cluster-specific marker genes in macrophage subtypes.	2.05e-10	0.261813	0.053	0.359	3.57e-06	1
Expression levels of cluster-specific marker genes in macrophage subtypes.	2.08e-10	0.576414	0.061	0.382	3.62e-06	1
Expression levels of cluster-specific marker genes in macrophage subtypes.	2.09e-10	0.609534	0.053	0.366	3.64e-06	1
Expression levels of cluster-specific marker genes in macrophage subtypes.	2.18e-10	0.537915	0.068	0.389	3.79e-06	1
Expression levels of cluster-specific marker genes in macrophage subtypes.	2.18e-10	0.336284	0.03	0.317	3.79e-06	1
Expression levels of cluster-specific marker genes in macrophage subtypes.	2.19e-10	0.432936	0.03	0.317	3.81e-06	1
Expression levels of cluster-specific marker genes in macrophage subtypes.	2.46e-10	0.500932	0.038	0.331	4.28e-06	1
Expression levels of cluster-specific marker genes in macrophage subtypes.	2.6e-10	0.411457	0.045	0.347	4.53e-06	1
Expression levels of cluster-specific marker genes in macrophage subtypes.	2.75e-10	0.457442	0.038	0.331	4.79e-06	1
Expression levels of cluster-specific marker genes in macrophage subtypes.	2.75e-10	0.391457	0.038	0.331	4.79e-06	1
Expression levels of cluster-specific marker genes in macrophage subtypes.	2.85e-10	0.395565	0.061	0.37	4.95e-06	1
Expression levels of cluster-specific marker genes in macrophage subtypes.	3.19e-10	0.28964	0.015	0.28	5.56e-06	1
Expression levels of cluster-specific marker genes in macrophage subtypes.	3.2e-10	0.335916	0.068	0.384	5.56e-06	1
Expression levels of cluster-specific marker genes in macrophage subtypes.	3.25e-10	0.290448	0.03	0.313	5.64e-06	1
Expression levels of cluster-specific marker genes in macrophage subtypes.	3.25e-10	0.259099	0.038	0.322	5.65e-06	1
Expression levels of cluster-specific marker genes in macrophage subtypes.	3.44e-10	0.325697	0.038	0.329	5.99e-06	1
Expression levels of cluster-specific marker genes in macrophage subtypes.	3.56e-10	0.320959	0.295	0.867	6.2e-06	1
Expression levels of cluster-specific marker genes in macrophage subtypes.	3.58e-10	0.272387	0.061	0.368	6.22e-06	1
Expression levels of cluster-specific marker genes in macrophage subtypes.	3.97e-10	0.40227	0.068	0.382	6.91e-06	1
Expression levels of cluster-specific marker genes in macrophage subtypes.	4.2e-10	0.625636	0.053	0.359	7.31e-06	1
Expression levels of cluster-specific marker genes in macrophage subtypes.	4.3e-10	0.578347	0.038	0.326	7.48e-06	1
Expression levels of cluster-specific marker genes in macrophage subtypes.	4.47e-10	0.316341	0.053	0.349	7.78e-06	1
Expression levels of cluster-specific marker genes in macrophage subtypes.	4.72e-10	0.46504	0.053	0.356	8.21e-06	1
Expression levels of cluster-specific marker genes in macrophage subtypes.	4.81e-10	0.452158	0.174	0.6	8.37e-06	1
Expression levels of cluster-specific marker genes in macrophage subtypes.	5.23e-10	0.787649	0.053	0.356	9.1e-06	1
Expression levels of cluster-specific marker genes in macrophage subtypes.	5.33e-10	0.324921	0.03	0.301	9.27e-06	1
Expression levels of cluster-specific marker genes in macrophage subtypes.	5.37e-10	0.352802	0.03	0.308	9.34e-06	1
Expression levels of cluster-specific marker genes in macrophage subtypes.	5.37e-10	0.256585	0.03	0.308	9.34e-06	1
Expression levels of cluster-specific marker genes in macrophage subtypes.	5.84e-10	0.527796	0.068	0.386	1.01e-05	1
Expression levels of cluster-specific marker genes in macrophage subtypes.	6.08e-10	1.58978	0.205	0.667	1.06e-05	1
Expression levels of cluster-specific marker genes in macrophage subtypes.	6.85e-10	1.10862	0.182	0.614	1.19e-05	1
Expression levels of cluster-specific marker genes in macrophage subtypes.	7.96e-10	0.348729	0.045	0.336	1.38e-05	1
Expression levels of cluster-specific marker genes in macrophage subtypes.	8.1e-10	0.582226	0.038	0.32	1.41e-05	1
Expression levels of cluster-specific marker genes in macrophage subtypes.	8.22e-10	0.437461	0.038	0.32	1.43e-05	1
Expression levels of cluster-specific marker genes in macrophage subtypes.	8.28e-10	0.343194	0.03	0.303	1.44e-05	1
Expression levels of cluster-specific marker genes in macrophage subtypes.	1e-09	0.651806	0.053	0.349	1.75e-05	1
Expression levels of cluster-specific marker genes in macrophage subtypes.	1.02e-09	0.297189	0.03	0.301	1.78e-05	1
Expression levels of cluster-specific marker genes in macrophage subtypes.	1.04e-09	0.353647	0.038	0.317	1.81e-05	1
Expression levels of cluster-specific marker genes in macrophage subtypes.	1.16e-09	0.426445	0.053	0.347	2.02e-05	1
Expression levels of cluster-specific marker genes in macrophage subtypes.	1.23e-09	0.462388	0.045	0.331	2.14e-05	1
Expression levels of cluster-specific marker genes in macrophage subtypes.	1.33e-09	0.285407	0.023	0.276	2.32e-05	1
Expression levels of cluster-specific marker genes in macrophage subtypes.	1.41e-09	0.845638	0.311	0.883	2.46e-05	1
Expression levels of cluster-specific marker genes in macrophage subtypes.	1.46e-09	0.344177	0.045	0.329	2.54e-05	1
Expression levels of cluster-specific marker genes in macrophage subtypes.	1.61e-09	0.56898	0.038	0.313	2.8e-05	1
Expression levels of cluster-specific marker genes in macrophage subtypes.	1.79e-09	0.577729	0.061	0.359	3.1e-05	1
Expression levels of cluster-specific marker genes in macrophage subtypes.	1.83e-09	0.531854	0.061	0.359	3.18e-05	1
Expression levels of cluster-specific marker genes in macrophage subtypes.	1.91e-09	0.299705	0.068	0.366	3.32e-05	1
Expression levels of cluster-specific marker genes in macrophage subtypes.	1.97e-09	0.309905	0.03	0.294	3.43e-05	1
Expression levels of cluster-specific marker genes in macrophage subtypes.	1.98e-09	0.356087	0.03	0.294	3.45e-05	1
Expression levels of cluster-specific marker genes in macrophage subtypes.	2.14e-09	0.403787	0.045	0.317	3.72e-05	1
Expression levels of cluster-specific marker genes in macrophage subtypes.	2.31e-09	0.311271	0.045	0.317	4.02e-05	1
Expression levels of cluster-specific marker genes in macrophage subtypes.	2.4e-09	0.439433	0.045	0.324	4.17e-05	1
Expression levels of cluster-specific marker genes in macrophage subtypes.	2.44e-09	0.453866	0.068	0.363	4.25e-05	1
Expression levels of cluster-specific marker genes in macrophage subtypes.	2.49e-09	0.323373	0.023	0.276	4.32e-05	1
Expression levels of cluster-specific marker genes in macrophage subtypes.	2.49e-09	0.291226	0.023	0.276	4.32e-05	1
Expression levels of cluster-specific marker genes in macrophage subtypes.	2.59e-09	0.541297	0.076	0.377	4.51e-05	1
Expression levels of cluster-specific marker genes in macrophage subtypes.	2.68e-09	0.507146	0.061	0.354	4.65e-05	1
Expression levels of cluster-specific marker genes in macrophage subtypes.	3.01e-09	0.274617	0.015	0.257	5.24e-05	1
Expression levels of cluster-specific marker genes in macrophage subtypes.	3.09e-09	0.314561	0.023	0.274	5.38e-05	1
Expression levels of cluster-specific marker genes in macrophage subtypes.	3.34e-09	0.303277	0.045	0.32	5.81e-05	1
Expression levels of cluster-specific marker genes in macrophage subtypes.	3.58e-09	0.886634	0.106	0.446	6.23e-05	1
Expression levels of cluster-specific marker genes in macrophage subtypes.	3.62e-09	0.323924	0.045	0.313	6.29e-05	1
Expression levels of cluster-specific marker genes in macrophage subtypes.	3.72e-09	0.401293	0.03	0.287	6.47e-05	1
Expression levels of cluster-specific marker genes in macrophage subtypes.	3.77e-09	0.263659	0.038	0.297	6.56e-05	1
Expression levels of cluster-specific marker genes in macrophage subtypes.	3.86e-09	0.825665	0.076	0.382	6.71e-05	1
Expression levels of cluster-specific marker genes in macrophage subtypes.	4.1e-09	0.602791	0.121	0.474	7.13e-05	1
Expression levels of cluster-specific marker genes in macrophage subtypes.	4.25e-09	0.336888	0.053	0.326	7.4e-05	1
Expression levels of cluster-specific marker genes in macrophage subtypes.	4.32e-09	0.678876	0.098	0.416	7.52e-05	1
Expression levels of cluster-specific marker genes in macrophage subtypes.	4.45e-09	0.271493	0.083	0.395	7.74e-05	1
Expression levels of cluster-specific marker genes in macrophage subtypes.	4.51e-09	0.355174	0.045	0.31	7.85e-05	1
Expression levels of cluster-specific marker genes in macrophage subtypes.	4.52e-09	0.373244	0.045	0.317	7.87e-05	1
Expression levels of cluster-specific marker genes in macrophage subtypes.	4.57e-09	0.515631	0.045	0.317	7.94e-05	1
Expression levels of cluster-specific marker genes in macrophage subtypes.	5.32e-09	0.309879	0.076	0.37	9.25e-05	1
Expression levels of cluster-specific marker genes in macrophage subtypes.	5.66e-09	0.458004	0.068	0.354	9.84e-05	1
Expression levels of cluster-specific marker genes in macrophage subtypes.	5.92e-09	0.309713	0.023	0.267	0.000102897	1
Expression levels of cluster-specific marker genes in macrophage subtypes.	5.92e-09	0.459779	0.03	0.283	0.000103008	1
Expression levels of cluster-specific marker genes in macrophage subtypes.	6.35e-09	0.328432	0.053	0.322	0.000110397	1
Expression levels of cluster-specific marker genes in macrophage subtypes.	6.64e-09	0.57718	0.341	0.908	0.00011552	1
Expression levels of cluster-specific marker genes in macrophage subtypes.	8.01e-09	0.557126	0.061	0.34	0.000139319	1
Expression levels of cluster-specific marker genes in macrophage subtypes.	8.16e-09	0.251854	0.023	0.257	0.00014196	1
Expression levels of cluster-specific marker genes in macrophage subtypes.	8.25e-09	0.313966	0.326	0.878	0.000143403	1
Expression levels of cluster-specific marker genes in macrophage subtypes.	8.31e-09	0.294367	0.053	0.326	0.00014454	1
Expression levels of cluster-specific marker genes in macrophage subtypes.	8.68e-09	0.524244	0.045	0.31	0.000150983	1
Expression levels of cluster-specific marker genes in macrophage subtypes.	8.7e-09	0.316707	0.045	0.303	0.000151252	1
Expression levels of cluster-specific marker genes in macrophage subtypes.	9.08e-09	0.312593	0.038	0.287	0.000157839	1
Expression levels of cluster-specific marker genes in macrophage subtypes.	9.12e-09	0.311482	0.038	0.287	0.00015861	1
Expression levels of cluster-specific marker genes in macrophage subtypes.	9.37e-09	0.820186	0.152	0.526	0.000162878	1
Expression levels of cluster-specific marker genes in macrophage subtypes.	1e-08	0.554729	0.053	0.324	0.000174678	1
Expression levels of cluster-specific marker genes in macrophage subtypes.	1.03e-08	0.51805	0.053	0.324	0.000178768	1
Expression levels of cluster-specific marker genes in macrophage subtypes.	1.05e-08	0.266167	0.038	0.292	0.00018171	1
Expression levels of cluster-specific marker genes in macrophage subtypes.	1.06e-08	1.24788	0.212	0.651	0.000184572	1
Expression levels of cluster-specific marker genes in macrophage subtypes.	1.11e-08	0.735232	0.091	0.391	0.000193565	1
Expression levels of cluster-specific marker genes in macrophage subtypes.	1.13e-08	0.370833	0.023	0.26	0.000195665	1
Expression levels of cluster-specific marker genes in macrophage subtypes.	1.13e-08	0.330346	0.023	0.26	0.000195665	1
Expression levels of cluster-specific marker genes in macrophage subtypes.	1.24e-08	0.675833	0.076	0.361	0.000216011	1
Expression levels of cluster-specific marker genes in macrophage subtypes.	1.29e-08	0.313651	0.038	0.29	0.000224217	1
Expression levels of cluster-specific marker genes in macrophage subtypes.	1.36e-08	0.447932	0.038	0.29	0.000236387	1
Expression levels of cluster-specific marker genes in macrophage subtypes.	1.37e-08	0.261725	0.03	0.274	0.000237544	1
Expression levels of cluster-specific marker genes in macrophage subtypes.	1.39e-08	0.473097	0.023	0.257	0.000242056	1
Expression levels of cluster-specific marker genes in macrophage subtypes.	1.39e-08	0.35011	0.023	0.257	0.000242056	1
Expression levels of cluster-specific marker genes in macrophage subtypes.	1.48e-08	0.780147	0.061	0.336	0.000256686	1
Expression levels of cluster-specific marker genes in macrophage subtypes.	1.53e-08	0.32561	0.053	0.32	0.000265362	1
Expression levels of cluster-specific marker genes in macrophage subtypes.	1.57e-08	0.28105	0.038	0.287	0.000273821	1
Expression levels of cluster-specific marker genes in macrophage subtypes.	1.65e-08	0.543253	0.045	0.297	0.000286559	1
Expression levels of cluster-specific marker genes in macrophage subtypes.	1.67e-08	0.299936	0.038	0.287	0.000290025	1
Expression levels of cluster-specific marker genes in macrophage subtypes.	1.68e-08	0.54485	0.038	0.287	0.000291416	1
Expression levels of cluster-specific marker genes in macrophage subtypes.	1.68e-08	0.261943	0.03	0.271	0.00029184	1
Expression levels of cluster-specific marker genes in macrophage subtypes.	1.71e-08	0.269534	0.03	0.271	0.000297619	1
Expression levels of cluster-specific marker genes in macrophage subtypes.	1.73e-08	0.460536	0.038	0.28	0.000300366	1
Expression levels of cluster-specific marker genes in macrophage subtypes.	1.79e-08	0.281256	0.083	0.372	0.00031184	1
Expression levels of cluster-specific marker genes in macrophage subtypes.	1.89e-08	0.783055	0.212	0.648	0.000328024	1
Expression levels of cluster-specific marker genes in macrophage subtypes.	1.91e-08	0.38369	0.053	0.31	0.000331627	1
Expression levels of cluster-specific marker genes in macrophage subtypes.	1.97e-08	0.368326	0.053	0.31	0.000342509	1
Expression levels of cluster-specific marker genes in macrophage subtypes.	2.27e-08	0.407393	0.053	0.315	0.000394558	1
Expression levels of cluster-specific marker genes in macrophage subtypes.	2.28e-08	0.276712	0.03	0.262	0.000397193	1
Expression levels of cluster-specific marker genes in macrophage subtypes.	2.54e-08	0.542405	0.061	0.322	0.000441635	1
Expression levels of cluster-specific marker genes in macrophage subtypes.	2.6e-08	0.510342	0.03	0.267	0.000452605	1
Expression levels of cluster-specific marker genes in macrophage subtypes.	2.74e-08	0.521451	0.174	0.559	0.000476733	1
Expression levels of cluster-specific marker genes in macrophage subtypes.	3.01e-08	0.490164	0.348	0.892	0.000523402	1
Expression levels of cluster-specific marker genes in macrophage subtypes.	3.21e-08	0.561986	0.03	0.264	0.000557531	1
Expression levels of cluster-specific marker genes in macrophage subtypes.	3.21e-08	0.484995	0.03	0.264	0.000557531	1
Expression levels of cluster-specific marker genes in macrophage subtypes.	3.3e-08	0.433732	0.038	0.274	0.000573065	1
Expression levels of cluster-specific marker genes in macrophage subtypes.	3.41e-08	0.287341	0.053	0.31	0.000592943	1
Expression levels of cluster-specific marker genes in macrophage subtypes.	3.61e-08	0.48463	0.068	0.34	0.000628197	1
Expression levels of cluster-specific marker genes in macrophage subtypes.	3.78e-08	1.27177	0.106	0.418	0.000656705	1
Expression levels of cluster-specific marker genes in macrophage subtypes.	3.82e-08	0.438387	0.045	0.287	0.000664373	1
Expression levels of cluster-specific marker genes in macrophage subtypes.	3.95e-08	0.561721	0.03	0.262	0.000686279	1
Expression levels of cluster-specific marker genes in macrophage subtypes.	4.37e-08	0.317001	0.03	0.255	0.000759405	1
Expression levels of cluster-specific marker genes in macrophage subtypes.	4.59e-08	0.25148	0.038	0.276	0.000797571	1
Expression levels of cluster-specific marker genes in macrophage subtypes.	4.68e-08	0.347079	0.03	0.255	0.000813007	1
Expression levels of cluster-specific marker genes in macrophage subtypes.	4.7e-08	0.531968	0.038	0.276	0.00081659	1
Expression levels of cluster-specific marker genes in macrophage subtypes.	4.72e-08	0.438506	0.038	0.276	0.000820446	1
Expression levels of cluster-specific marker genes in macrophage subtypes.	4.75e-08	0.947615	0.22	0.637	0.000826748	1
Expression levels of cluster-specific marker genes in macrophage subtypes.	4.83e-08	0.261115	0.03	0.26	0.000840074	1
Expression levels of cluster-specific marker genes in macrophage subtypes.	4.86e-08	0.271994	0.038	0.274	0.000845909	1
Expression levels of cluster-specific marker genes in macrophage subtypes.	4.94e-08	0.967847	0.152	0.506	0.000858702	1
Expression levels of cluster-specific marker genes in macrophage subtypes.	5.06e-08	0.580836	0.326	0.903	0.000879726	1
Expression levels of cluster-specific marker genes in macrophage subtypes.	5.09e-08	0.58088	0.136	0.462	0.000884549	1
Expression levels of cluster-specific marker genes in macrophage subtypes.	5.44e-08	0.274893	0.061	0.313	0.000946212	1
Expression levels of cluster-specific marker genes in macrophage subtypes.	5.61e-08	0.640205	0.068	0.336	0.000975311	1
Expression levels of cluster-specific marker genes in macrophage subtypes.	5.82e-08	0.665599	0.22	0.628	0.00101255	1
Expression levels of cluster-specific marker genes in macrophage subtypes.	6.2e-08	1.34894	0.152	0.503	0.00107845	1
Expression levels of cluster-specific marker genes in macrophage subtypes.	6.8e-08	0.369063	0.371	0.931	0.00118313	1
Expression levels of cluster-specific marker genes in macrophage subtypes.	7.02e-08	0.275029	0.03	0.255	0.00122046	1
Expression levels of cluster-specific marker genes in macrophage subtypes.	7.07e-08	0.288891	0.038	0.271	0.001229	1
Expression levels of cluster-specific marker genes in macrophage subtypes.	7.26e-08	0.47229	0.03	0.255	0.00126219	1
Expression levels of cluster-specific marker genes in macrophage subtypes.	7.42e-08	0.401638	0.386	0.982	0.00128992	1
Expression levels of cluster-specific marker genes in macrophage subtypes.	7.42e-08	0.837133	0.136	0.471	0.00129081	1
Expression levels of cluster-specific marker genes in macrophage subtypes.	7.62e-08	0.310741	0.038	0.264	0.00132437	1
Expression levels of cluster-specific marker genes in macrophage subtypes.	7.62e-08	0.299132	0.038	0.264	0.00132437	1
Expression levels of cluster-specific marker genes in macrophage subtypes.	8.58e-08	0.401171	0.038	0.269	0.00149207	1
Expression levels of cluster-specific marker genes in macrophage subtypes.	9e-08	0.379607	0.03	0.253	0.00156409	1
Expression levels of cluster-specific marker genes in macrophage subtypes.	1e-07	3.771	0.045	0.283	0.00174562	1
Expression levels of cluster-specific marker genes in macrophage subtypes.	1.03e-07	0.597184	0.098	0.382	0.00179737	1
Expression levels of cluster-specific marker genes in macrophage subtypes.	1.06e-07	0.287518	0.045	0.276	0.00185037	1
Expression levels of cluster-specific marker genes in macrophage subtypes.	1.07e-07	0.316841	0.045	0.276	0.00185885	1
Expression levels of cluster-specific marker genes in macrophage subtypes.	1.07e-07	0.412687	0.045	0.276	0.00186738	1
Expression levels of cluster-specific marker genes in macrophage subtypes.	1.1e-07	0.3119	0.045	0.276	0.00191935	1
Expression levels of cluster-specific marker genes in macrophage subtypes.	1.16e-07	0.593145	0.053	0.297	0.00201053	1
Expression levels of cluster-specific marker genes in macrophage subtypes.	1.16e-07	1.14916	0.174	0.533	0.00201748	1
Expression levels of cluster-specific marker genes in macrophage subtypes.	1.18e-07	0.735967	0.053	0.297	0.00204652	1
Expression levels of cluster-specific marker genes in macrophage subtypes.	1.26e-07	0.388825	0.045	0.274	0.00219859	1
Expression levels of cluster-specific marker genes in macrophage subtypes.	1.3e-07	0.340113	0.038	0.264	0.00226709	1
Expression levels of cluster-specific marker genes in macrophage subtypes.	1.32e-07	0.537355	0.045	0.274	0.00229077	1
Expression levels of cluster-specific marker genes in macrophage subtypes.	1.59e-07	0.487426	0.038	0.262	0.00277197	1
Expression levels of cluster-specific marker genes in macrophage subtypes.	1.7e-07	1.08883	0.098	0.377	0.00295498	1
Expression levels of cluster-specific marker genes in macrophage subtypes.	1.76e-07	1.07439	0.121	0.43	0.00305763	1
Expression levels of cluster-specific marker genes in macrophage subtypes.	1.85e-07	0.472207	0.053	0.285	0.00322224	1
Expression levels of cluster-specific marker genes in macrophage subtypes.	2.12e-07	0.376631	0.053	0.29	0.00367872	1
Expression levels of cluster-specific marker genes in macrophage subtypes.	2.15e-07	1.07204	0.106	0.389	0.00373773	1
Expression levels of cluster-specific marker genes in macrophage subtypes.	2.21e-07	2.82036	0.682	0.929	0.00384723	1
Expression levels of cluster-specific marker genes in macrophage subtypes.	2.38e-07	0.56682	0.038	0.257	0.00413492	1
Expression levels of cluster-specific marker genes in macrophage subtypes.	2.38e-07	0.406743	0.038	0.257	0.00413492	1
Expression levels of cluster-specific marker genes in macrophage subtypes.	2.6e-07	0.489014	0.038	0.251	0.00452688	1
Expression levels of cluster-specific marker genes in macrophage subtypes.	2.68e-07	0.258191	0.053	0.28	0.00465996	1
Expression levels of cluster-specific marker genes in macrophage subtypes.	3.2e-07	0.611934	0.311	0.814	0.00556409	1
Expression levels of cluster-specific marker genes in macrophage subtypes.	3.28e-07	0.603702	0.053	0.278	0.00570981	1
Expression levels of cluster-specific marker genes in macrophage subtypes.	3.81e-07	0.561116	0.379	0.952	0.00663143	1
Expression levels of cluster-specific marker genes in macrophage subtypes.	3.91e-07	0.357878	0.045	0.267	0.00679373	1
Expression levels of cluster-specific marker genes in macrophage subtypes.	4.31e-07	0.367358	0.038	0.251	0.00749204	1
Expression levels of cluster-specific marker genes in macrophage subtypes.	5.1e-07	0.750959	0.061	0.287	0.00886079	1
Expression levels of cluster-specific marker genes in macrophage subtypes.	5.39e-07	0.321006	0.045	0.257	0.0093713	1
Expression levels of cluster-specific marker genes in macrophage subtypes.	6.4e-07	0.338822	0.045	0.255	0.0111256	1
Expression levels of cluster-specific marker genes in macrophage subtypes.	7.12e-07	0.53462	0.045	0.26	0.0123836	1
Expression levels of cluster-specific marker genes in macrophage subtypes.	7.64e-07	0.813561	0.356	0.94	0.0132891	1
Expression levels of cluster-specific marker genes in macrophage subtypes.	7.73e-07	0.264115	0.045	0.253	0.0134358	1
Expression levels of cluster-specific marker genes in macrophage subtypes.	8.71e-07	0.447674	0.045	0.257	0.0151474	1
Expression levels of cluster-specific marker genes in macrophage subtypes.	1.17e-06	0.51393	0.053	0.269	0.020339	1
Expression levels of cluster-specific marker genes in macrophage subtypes.	1.45e-06	0.263769	0.409	0.97	0.0252148	1
Expression levels of cluster-specific marker genes in macrophage subtypes.	1.57e-06	0.525878	0.061	0.274	0.0273649	1
Expression levels of cluster-specific marker genes in macrophage subtypes.	1.62e-06	0.862615	0.076	0.31	0.0281471	1
Expression levels of cluster-specific marker genes in macrophage subtypes.	1.63e-06	0.471128	0.364	0.908	0.0284227	1
Expression levels of cluster-specific marker genes in macrophage subtypes.	2.08e-06	4.86976	0.061	0.276	0.0360878	1
Expression levels of cluster-specific marker genes in macrophage subtypes.	2.56e-06	0.535465	0.061	0.269	0.0444345	1
Expression levels of cluster-specific marker genes in macrophage subtypes.	2.56e-06	0.858895	0.068	0.29	0.0444427	1
Expression levels of cluster-specific marker genes in macrophage subtypes.	4.29e-06	0.473016	0.061	0.262	0.0746735	1
Expression levels of cluster-specific marker genes in macrophage subtypes.	5.01e-06	0.288363	0.212	0.526	0.0871168	1
Expression levels of cluster-specific marker genes in macrophage subtypes.	5.31e-06	1.10765	0.053	0.251	0.0922764	1
Expression levels of cluster-specific marker genes in macrophage subtypes.	5.59e-06	0.439487	0.091	0.322	0.0971434	1
Expression levels of cluster-specific marker genes in macrophage subtypes.	6.03e-06	0.786678	0.182	0.48	0.104834	1
Expression levels of cluster-specific marker genes in macrophage subtypes.	6.52e-06	0.618004	0.061	0.262	0.11335	1
Expression levels of cluster-specific marker genes in macrophage subtypes.	6.97e-06	0.55342	0.303	0.752	0.121152	1
Expression levels of cluster-specific marker genes in macrophage subtypes.	1.18e-05	0.424698	0.432	0.975	0.204787	1
Expression levels of cluster-specific marker genes in macrophage subtypes.	1.41e-05	1.07939	0.061	0.253	0.244938	1
Expression levels of cluster-specific marker genes in macrophage subtypes.	1.75e-05	0.48977	0.977	1	0.303536	1
Expression levels of cluster-specific marker genes in macrophage subtypes.	1.86e-05	0.438369	0.424	0.943	0.323674	1
Expression levels of cluster-specific marker genes in macrophage subtypes.	3.86e-05	0.408331	0.394	0.864	0.672032	1
Expression levels of cluster-specific marker genes in macrophage subtypes.	4.33e-05	1.00111	0.076	0.267	0.752678	1
Expression levels of cluster-specific marker genes in macrophage subtypes.	4.36e-05	0.749648	0.076	0.267	0.758106	1
Expression levels of cluster-specific marker genes in macrophage subtypes.	4.44e-05	0.829816	0.311	0.736	0.772719	1
Expression levels of cluster-specific marker genes in macrophage subtypes.	6.03e-05	0.858612	0.091	0.285	1	1
Expression levels of cluster-specific marker genes in macrophage subtypes.	6.57e-05	1.24012	0.114	0.333	1	1
Expression levels of cluster-specific marker genes in macrophage subtypes.	7.95e-05	0.926017	0.083	0.267	1	1
Expression levels of cluster-specific marker genes in macrophage subtypes.	8.08e-05	0.804649	0.326	0.729	1	1
Expression levels of cluster-specific marker genes in macrophage subtypes.	0.00011556	0.431916	0.424	0.954	1	1
Expression levels of cluster-specific marker genes in macrophage subtypes.	0.000145172	1.98026	0.356	0.844	1	1
Expression levels of cluster-specific marker genes in macrophage subtypes.	0.000217057	0.506082	0.098	0.276	1	1
Expression levels of cluster-specific marker genes in macrophage subtypes.	0.000315579	1.38307	0.144	0.366	1	1
Expression levels of cluster-specific marker genes in macrophage subtypes.	0.000330838	0.382265	0.462	0.926	1	1
Expression levels of cluster-specific marker genes in macrophage subtypes.	0.000407436	0.542595	0.212	0.471	1	1
Expression levels of cluster-specific marker genes in macrophage subtypes.	0.000416971	0.385456	0.447	0.989	1	1
Expression levels of cluster-specific marker genes in macrophage subtypes.	0.000468354	0.73125	0.106	0.283	1	1
Expression levels of cluster-specific marker genes in macrophage subtypes.	0.000615431	1.10306	0.106	0.283	1	1
Expression levels of cluster-specific marker genes in macrophage subtypes.	0.000792195	1.09071	0.098	0.264	1	1
Expression levels of cluster-specific marker genes in macrophage subtypes.	0.00101273	1.28936	0.098	0.262	1	1
Expression levels of cluster-specific marker genes in macrophage subtypes.	0.00122072	0.735867	0.098	0.253	1	1
Expression levels of cluster-specific marker genes in macrophage subtypes.	0.00123914	0.697231	0.947	1	1	1
Expression levels of cluster-specific marker genes in macrophage subtypes.	0.00162517	0.776659	0.439	0.8	1	1
Expression levels of cluster-specific marker genes in macrophage subtypes.	0.00529241	0.654623	0.197	0.389	1	1
Expression levels of cluster-specific marker genes in macrophage subtypes.	0.00693198	1.00339	0.295	0.595	1	1
Expression levels of cluster-specific marker genes in macrophage subtypes.	0.00841597	2.0345	0.545	0.763	1	1
Expression levels of cluster-specific marker genes in macrophage subtypes.	0.00960767	0.298058	0.5	0.97	1	1
Expression levels of cluster-specific marker genes in macrophage subtypes.	6.42e-32	1.85923	0.878	0.439	1.12e-27	2
Expression levels of cluster-specific marker genes in macrophage subtypes.	1.59e-30	1.28388	0.992	0.761	2.76e-26	2
Expression levels of cluster-specific marker genes in macrophage subtypes.	2e-30	1.34295	0.927	0.532	3.48e-26	2
Expression levels of cluster-specific marker genes in macrophage subtypes.	1.41e-29	1.71211	0.984	0.829	2.45e-25	2
Expression levels of cluster-specific marker genes in macrophage subtypes.	1.94e-29	1.96114	0.789	0.3	3.38e-25	2
Expression levels of cluster-specific marker genes in macrophage subtypes.	2.96e-28	1.40513	0.724	0.218	5.15e-24	2
Expression levels of cluster-specific marker genes in macrophage subtypes.	3.2e-27	1.10557	1	0.833	5.56e-23	2
Expression levels of cluster-specific marker genes in macrophage subtypes.	8.51e-27	1.56707	0.854	0.439	1.48e-22	2
Expression levels of cluster-specific marker genes in macrophage subtypes.	1.6e-25	0.908302	0.992	0.759	2.78e-21	2
Expression levels of cluster-specific marker genes in macrophage subtypes.	5.32e-25	1.60723	0.967	0.619	9.25e-21	2
Expression levels of cluster-specific marker genes in macrophage subtypes.	1.53e-23	0.863132	0.976	0.752	2.66e-19	2
Expression levels of cluster-specific marker genes in macrophage subtypes.	1.91e-23	1.27694	0.797	0.419	3.32e-19	2
Expression levels of cluster-specific marker genes in macrophage subtypes.	4.34e-23	1.1791	0.862	0.561	7.54e-19	2
Expression levels of cluster-specific marker genes in macrophage subtypes.	4.75e-23	1.02661	0.919	0.552	8.27e-19	2
Expression levels of cluster-specific marker genes in macrophage subtypes.	7.14e-23	0.943736	0.472	0.099	1.24e-18	2
Expression levels of cluster-specific marker genes in macrophage subtypes.	1.74e-22	1.0369	0.935	0.721	3.02e-18	2
Expression levels of cluster-specific marker genes in macrophage subtypes.	3.56e-22	0.825396	0.967	0.73	6.19e-18	2
Expression levels of cluster-specific marker genes in macrophage subtypes.	4.33e-22	1.0552	0.634	0.214	7.54e-18	2
Expression levels of cluster-specific marker genes in macrophage subtypes.	1.78e-21	0.733856	0.959	0.671	3.09e-17	2
Expression levels of cluster-specific marker genes in macrophage subtypes.	3.43e-21	0.871824	0.886	0.586	5.97e-17	2
Expression levels of cluster-specific marker genes in macrophage subtypes.	4.29e-21	0.954768	0.992	0.863	7.45e-17	2
Expression levels of cluster-specific marker genes in macrophage subtypes.	6.77e-21	0.91066	0.886	0.628	1.18e-16	2
Expression levels of cluster-specific marker genes in macrophage subtypes.	1.11e-20	0.716228	0.756	0.356	1.93e-16	2
Expression levels of cluster-specific marker genes in macrophage subtypes.	2e-20	0.993655	0.984	0.788	3.47e-16	2
Expression levels of cluster-specific marker genes in macrophage subtypes.	6.58e-20	1.04284	0.748	0.367	1.14e-15	2
Expression levels of cluster-specific marker genes in macrophage subtypes.	6.79e-20	0.89441	0.935	0.64	1.18e-15	2
Expression levels of cluster-specific marker genes in macrophage subtypes.	1.61e-19	0.80953	0.976	0.797	2.81e-15	2
Expression levels of cluster-specific marker genes in macrophage subtypes.	1.93e-19	1.2529	0.675	0.313	3.35e-15	2
Expression levels of cluster-specific marker genes in macrophage subtypes.	4.04e-19	0.628922	0.911	0.581	7.02e-15	2
Expression levels of cluster-specific marker genes in macrophage subtypes.	6.68e-19	0.719337	0.935	0.723	1.16e-14	2
Expression levels of cluster-specific marker genes in macrophage subtypes.	7.38e-19	1.37189	0.943	0.64	1.28e-14	2
Expression levels of cluster-specific marker genes in macrophage subtypes.	2.28e-18	1.04489	0.935	0.577	3.97e-14	2
Expression levels of cluster-specific marker genes in macrophage subtypes.	2.45e-18	0.845901	0.935	0.678	4.27e-14	2
Expression levels of cluster-specific marker genes in macrophage subtypes.	2.68e-18	1.11689	0.854	0.624	4.66e-14	2
Expression levels of cluster-specific marker genes in macrophage subtypes.	4.1e-18	0.672245	0.829	0.534	7.13e-14	2
Expression levels of cluster-specific marker genes in macrophage subtypes.	4.13e-18	0.754404	0.992	0.709	7.18e-14	2
Expression levels of cluster-specific marker genes in macrophage subtypes.	8.08e-18	0.727118	0.943	0.68	1.4e-13	2
Expression levels of cluster-specific marker genes in macrophage subtypes.	9.33e-18	0.746071	0.951	0.734	1.62e-13	2
Expression levels of cluster-specific marker genes in macrophage subtypes.	1.1e-17	0.898277	0.967	0.766	1.9e-13	2
Expression levels of cluster-specific marker genes in macrophage subtypes.	1.11e-17	0.789244	0.943	0.727	1.93e-13	2
Expression levels of cluster-specific marker genes in macrophage subtypes.	1.71e-17	0.606698	0.967	0.732	2.97e-13	2
Expression levels of cluster-specific marker genes in macrophage subtypes.	1.95e-17	0.900731	0.846	0.601	3.39e-13	2
Expression levels of cluster-specific marker genes in macrophage subtypes.	1.96e-17	0.86539	0.699	0.36	3.41e-13	2
Expression levels of cluster-specific marker genes in macrophage subtypes.	2.03e-17	0.803937	0.789	0.486	3.52e-13	2
Expression levels of cluster-specific marker genes in macrophage subtypes.	3.1e-17	0.759889	0.797	0.516	5.4e-13	2
Expression levels of cluster-specific marker genes in macrophage subtypes.	3.52e-17	0.730488	0.854	0.554	6.11e-13	2
Expression levels of cluster-specific marker genes in macrophage subtypes.	5.38e-17	0.845498	0.951	0.725	9.35e-13	2
Expression levels of cluster-specific marker genes in macrophage subtypes.	7.61e-17	0.754436	0.634	0.306	1.32e-12	2
Expression levels of cluster-specific marker genes in macrophage subtypes.	8.25e-17	0.541038	0.805	0.493	1.43e-12	2
Expression levels of cluster-specific marker genes in macrophage subtypes.	8.56e-17	0.823447	0.894	0.662	1.49e-12	2
Expression levels of cluster-specific marker genes in macrophage subtypes.	1.01e-16	1.08299	0.512	0.171	1.75e-12	2
Expression levels of cluster-specific marker genes in macrophage subtypes.	1.14e-16	0.691162	0.943	0.745	1.98e-12	2
Expression levels of cluster-specific marker genes in macrophage subtypes.	1.15e-16	0.802155	1	0.926	2e-12	2
Expression levels of cluster-specific marker genes in macrophage subtypes.	1.17e-16	0.838917	0.976	0.788	2.04e-12	2
Expression levels of cluster-specific marker genes in macrophage subtypes.	1.72e-16	0.57731	0.967	0.714	2.99e-12	2
Expression levels of cluster-specific marker genes in macrophage subtypes.	2e-16	0.67738	0.902	0.671	3.48e-12	2
Expression levels of cluster-specific marker genes in macrophage subtypes.	2.11e-16	1.33161	0.634	0.275	3.67e-12	2
Expression levels of cluster-specific marker genes in macrophage subtypes.	2.18e-16	0.845815	0.561	0.198	3.8e-12	2
Expression levels of cluster-specific marker genes in macrophage subtypes.	2.83e-16	0.87919	0.626	0.264	4.92e-12	2
Expression levels of cluster-specific marker genes in macrophage subtypes.	2.88e-16	0.844042	0.935	0.642	5.02e-12	2
Expression levels of cluster-specific marker genes in macrophage subtypes.	3.02e-16	0.805274	0.976	0.806	5.24e-12	2
Expression levels of cluster-specific marker genes in macrophage subtypes.	3.85e-16	1.01611	0.675	0.302	6.7e-12	2
Expression levels of cluster-specific marker genes in macrophage subtypes.	5.35e-16	1.74145	0.821	0.527	9.31e-12	2
Expression levels of cluster-specific marker genes in macrophage subtypes.	6.35e-16	0.56466	0.878	0.543	1.1e-11	2
Expression levels of cluster-specific marker genes in macrophage subtypes.	8.35e-16	0.708922	0.74	0.446	1.45e-11	2
Expression levels of cluster-specific marker genes in macrophage subtypes.	8.68e-16	0.714087	0.805	0.525	1.51e-11	2
Expression levels of cluster-specific marker genes in macrophage subtypes.	1.05e-15	0.904856	0.667	0.365	1.83e-11	2
Expression levels of cluster-specific marker genes in macrophage subtypes.	1.08e-15	0.630286	0.902	0.669	1.89e-11	2
Expression levels of cluster-specific marker genes in macrophage subtypes.	1.11e-15	0.913825	0.862	0.601	1.93e-11	2
Expression levels of cluster-specific marker genes in macrophage subtypes.	1.21e-15	0.950634	0.886	0.671	2.1e-11	2
Expression levels of cluster-specific marker genes in macrophage subtypes.	1.29e-15	1.22412	0.959	0.77	2.24e-11	2
Expression levels of cluster-specific marker genes in macrophage subtypes.	1.41e-15	0.80312	0.724	0.399	2.45e-11	2
Expression levels of cluster-specific marker genes in macrophage subtypes.	2.79e-15	0.771605	0.943	0.653	4.84e-11	2
Expression levels of cluster-specific marker genes in macrophage subtypes.	2.83e-15	0.654763	0.894	0.649	4.92e-11	2
Expression levels of cluster-specific marker genes in macrophage subtypes.	3.02e-15	0.653724	0.967	0.793	5.24e-11	2
Expression levels of cluster-specific marker genes in macrophage subtypes.	3.02e-15	0.614884	0.927	0.696	5.26e-11	2
Expression levels of cluster-specific marker genes in macrophage subtypes.	3.11e-15	0.78294	0.992	0.822	5.4e-11	2
Expression levels of cluster-specific marker genes in macrophage subtypes.	3.71e-15	0.505195	0.919	0.673	6.45e-11	2
Expression levels of cluster-specific marker genes in macrophage subtypes.	3.86e-15	0.644784	0.935	0.714	6.72e-11	2
Expression levels of cluster-specific marker genes in macrophage subtypes.	4.6e-15	0.973555	0.561	0.221	8e-11	2
Expression levels of cluster-specific marker genes in macrophage subtypes.	5.59e-15	0.894744	0.593	0.266	9.71e-11	2
Expression levels of cluster-specific marker genes in macrophage subtypes.	5.85e-15	0.829845	0.667	0.372	1.02e-10	2
Expression levels of cluster-specific marker genes in macrophage subtypes.	6.17e-15	0.791137	0.78	0.509	1.07e-10	2
Expression levels of cluster-specific marker genes in macrophage subtypes.	6.48e-15	0.691694	0.862	0.653	1.13e-10	2
Expression levels of cluster-specific marker genes in macrophage subtypes.	6.64e-15	0.885749	0.927	0.669	1.15e-10	2
Expression levels of cluster-specific marker genes in macrophage subtypes.	6.87e-15	0.754138	0.87	0.568	1.2e-10	2
Expression levels of cluster-specific marker genes in macrophage subtypes.	7.58e-15	0.606303	0.805	0.541	1.32e-10	2
Expression levels of cluster-specific marker genes in macrophage subtypes.	9.02e-15	0.734915	0.789	0.547	1.57e-10	2
Expression levels of cluster-specific marker genes in macrophage subtypes.	1.07e-14	0.43678	0.837	0.624	1.87e-10	2
Expression levels of cluster-specific marker genes in macrophage subtypes.	1.18e-14	0.405199	0.992	0.827	2.06e-10	2
Expression levels of cluster-specific marker genes in macrophage subtypes.	1.2e-14	0.707819	0.902	0.624	2.08e-10	2
Expression levels of cluster-specific marker genes in macrophage subtypes.	1.21e-14	0.687223	0.919	0.712	2.1e-10	2
Expression levels of cluster-specific marker genes in macrophage subtypes.	1.23e-14	0.790298	0.927	0.68	2.13e-10	2
Expression levels of cluster-specific marker genes in macrophage subtypes.	1.38e-14	0.715554	0.886	0.655	2.4e-10	2
Expression levels of cluster-specific marker genes in macrophage subtypes.	1.4e-14	0.547206	0.935	0.745	2.43e-10	2
Expression levels of cluster-specific marker genes in macrophage subtypes.	1.56e-14	0.613256	0.886	0.667	2.71e-10	2
Expression levels of cluster-specific marker genes in macrophage subtypes.	1.67e-14	0.783465	0.992	0.766	2.91e-10	2
Expression levels of cluster-specific marker genes in macrophage subtypes.	1.86e-14	0.591842	0.911	0.698	3.23e-10	2
Expression levels of cluster-specific marker genes in macrophage subtypes.	2.09e-14	0.81098	0.976	0.815	3.63e-10	2
Expression levels of cluster-specific marker genes in macrophage subtypes.	2.37e-14	0.856741	0.626	0.315	4.12e-10	2
Expression levels of cluster-specific marker genes in macrophage subtypes.	2.46e-14	0.873293	0.854	0.599	4.29e-10	2
Expression levels of cluster-specific marker genes in macrophage subtypes.	2.68e-14	0.707774	0.829	0.538	4.66e-10	2
Expression levels of cluster-specific marker genes in macrophage subtypes.	4.86e-14	0.858463	0.821	0.495	8.45e-10	2
Expression levels of cluster-specific marker genes in macrophage subtypes.	5.29e-14	0.599717	0.748	0.459	9.19e-10	2
Expression levels of cluster-specific marker genes in macrophage subtypes.	5.37e-14	0.587763	0.927	0.703	9.33e-10	2
Expression levels of cluster-specific marker genes in macrophage subtypes.	8.19e-14	0.516512	0.984	0.863	1.42e-09	2
Expression levels of cluster-specific marker genes in macrophage subtypes.	8.33e-14	0.703555	0.813	0.565	1.45e-09	2
Expression levels of cluster-specific marker genes in macrophage subtypes.	8.52e-14	0.724324	0.789	0.554	1.48e-09	2
Expression levels of cluster-specific marker genes in macrophage subtypes.	9.47e-14	0.471042	0.821	0.509	1.65e-09	2
Expression levels of cluster-specific marker genes in macrophage subtypes.	1.07e-13	0.622546	0.886	0.655	1.87e-09	2
Expression levels of cluster-specific marker genes in macrophage subtypes.	1.09e-13	0.755506	0.61	0.309	1.9e-09	2
Expression levels of cluster-specific marker genes in macrophage subtypes.	1.1e-13	0.680632	0.846	0.604	1.91e-09	2
Expression levels of cluster-specific marker genes in macrophage subtypes.	1.11e-13	0.591692	0.959	0.7	1.94e-09	2
Expression levels of cluster-specific marker genes in macrophage subtypes.	1.13e-13	0.668194	1	0.849	1.97e-09	2
Expression levels of cluster-specific marker genes in macrophage subtypes.	1.2e-13	0.820445	0.821	0.64	2.09e-09	2
Expression levels of cluster-specific marker genes in macrophage subtypes.	1.33e-13	0.665105	0.78	0.507	2.32e-09	2
Expression levels of cluster-specific marker genes in macrophage subtypes.	1.52e-13	0.682316	0.707	0.401	2.64e-09	2
Expression levels of cluster-specific marker genes in macrophage subtypes.	1.85e-13	0.507553	0.902	0.66	3.22e-09	2
Expression levels of cluster-specific marker genes in macrophage subtypes.	2.06e-13	0.663099	0.724	0.453	3.58e-09	2
Expression levels of cluster-specific marker genes in macrophage subtypes.	2.13e-13	0.657622	0.797	0.561	3.7e-09	2
Expression levels of cluster-specific marker genes in macrophage subtypes.	2.17e-13	0.902223	0.789	0.532	3.77e-09	2
Expression levels of cluster-specific marker genes in macrophage subtypes.	2.3e-13	0.81175	0.976	0.718	4e-09	2
Expression levels of cluster-specific marker genes in macrophage subtypes.	2.55e-13	0.780157	0.569	0.291	4.43e-09	2
Expression levels of cluster-specific marker genes in macrophage subtypes.	3.32e-13	0.416714	0.984	0.804	5.76e-09	2
Expression levels of cluster-specific marker genes in macrophage subtypes.	3.55e-13	0.481505	0.951	0.748	6.17e-09	2
Expression levels of cluster-specific marker genes in macrophage subtypes.	3.87e-13	1.50028	0.724	0.464	6.73e-09	2
Expression levels of cluster-specific marker genes in macrophage subtypes.	4.27e-13	0.747243	0.553	0.273	7.42e-09	2
Expression levels of cluster-specific marker genes in macrophage subtypes.	4.31e-13	0.883276	0.78	0.441	7.49e-09	2
Expression levels of cluster-specific marker genes in macrophage subtypes.	4.69e-13	0.782671	0.935	0.727	8.16e-09	2
Expression levels of cluster-specific marker genes in macrophage subtypes.	4.81e-13	0.561669	0.967	0.759	8.36e-09	2
Expression levels of cluster-specific marker genes in macrophage subtypes.	5.01e-13	0.742814	0.943	0.628	8.71e-09	2
Expression levels of cluster-specific marker genes in macrophage subtypes.	7.32e-13	0.650106	0.886	0.617	1.27e-08	2
Expression levels of cluster-specific marker genes in macrophage subtypes.	7.35e-13	0.592003	0.854	0.64	1.28e-08	2
Expression levels of cluster-specific marker genes in macrophage subtypes.	7.72e-13	0.596219	1	0.829	1.34e-08	2
Expression levels of cluster-specific marker genes in macrophage subtypes.	8.1e-13	0.443084	0.911	0.685	1.41e-08	2
Expression levels of cluster-specific marker genes in macrophage subtypes.	8.18e-13	0.668673	0.772	0.534	1.42e-08	2
Expression levels of cluster-specific marker genes in macrophage subtypes.	9.15e-13	0.536548	0.984	0.775	1.59e-08	2
Expression levels of cluster-specific marker genes in macrophage subtypes.	9.39e-13	0.666139	0.797	0.5	1.63e-08	2
Expression levels of cluster-specific marker genes in macrophage subtypes.	1.02e-12	0.556088	0.919	0.676	1.77e-08	2
Expression levels of cluster-specific marker genes in macrophage subtypes.	1.03e-12	0.645026	0.805	0.572	1.78e-08	2
Expression levels of cluster-specific marker genes in macrophage subtypes.	1.06e-12	0.891703	0.854	0.606	1.84e-08	2
Expression levels of cluster-specific marker genes in macrophage subtypes.	1.29e-12	0.775913	0.805	0.563	2.24e-08	2
Expression levels of cluster-specific marker genes in macrophage subtypes.	1.33e-12	0.881544	0.959	0.764	2.32e-08	2
Expression levels of cluster-specific marker genes in macrophage subtypes.	1.52e-12	0.453178	0.886	0.637	2.64e-08	2
Expression levels of cluster-specific marker genes in macrophage subtypes.	1.68e-12	0.969476	0.634	0.372	2.91e-08	2
Expression levels of cluster-specific marker genes in macrophage subtypes.	1.72e-12	0.655075	0.862	0.622	3e-08	2
Expression levels of cluster-specific marker genes in macrophage subtypes.	1.75e-12	0.744023	0.707	0.453	3.05e-08	2
Expression levels of cluster-specific marker genes in macrophage subtypes.	2.08e-12	0.478968	0.455	0.176	3.61e-08	2
Expression levels of cluster-specific marker genes in macrophage subtypes.	2.26e-12	0.832889	0.707	0.466	3.93e-08	2
Expression levels of cluster-specific marker genes in macrophage subtypes.	2.55e-12	0.764091	0.626	0.354	4.44e-08	2
Expression levels of cluster-specific marker genes in macrophage subtypes.	2.83e-12	0.543618	0.846	0.61	4.91e-08	2
Expression levels of cluster-specific marker genes in macrophage subtypes.	3.17e-12	0.811321	0.415	0.14	5.51e-08	2
Expression levels of cluster-specific marker genes in macrophage subtypes.	3.42e-12	0.710548	0.992	0.887	5.95e-08	2
Expression levels of cluster-specific marker genes in macrophage subtypes.	3.5e-12	0.807855	0.943	0.723	6.09e-08	2
Expression levels of cluster-specific marker genes in macrophage subtypes.	3.85e-12	0.737958	0.967	0.8	6.69e-08	2
Expression levels of cluster-specific marker genes in macrophage subtypes.	4.9e-12	2.08509	0.358	0.115	8.53e-08	2
Expression levels of cluster-specific marker genes in macrophage subtypes.	6.49e-12	0.526747	0.935	0.705	1.13e-07	2
Expression levels of cluster-specific marker genes in macrophage subtypes.	7.1e-12	0.7023	0.764	0.527	1.24e-07	2
Expression levels of cluster-specific marker genes in macrophage subtypes.	7.66e-12	0.46997	0.789	0.5	1.33e-07	2
Expression levels of cluster-specific marker genes in macrophage subtypes.	7.74e-12	0.442981	0.797	0.595	1.35e-07	2
Expression levels of cluster-specific marker genes in macrophage subtypes.	8.18e-12	0.588893	0.813	0.583	1.42e-07	2
Expression levels of cluster-specific marker genes in macrophage subtypes.	8.33e-12	1.1012	0.984	0.881	1.45e-07	2
Expression levels of cluster-specific marker genes in macrophage subtypes.	9.29e-12	0.747874	0.561	0.318	1.62e-07	2
Expression levels of cluster-specific marker genes in macrophage subtypes.	9.36e-12	0.70289	0.756	0.5	1.63e-07	2
Expression levels of cluster-specific marker genes in macrophage subtypes.	1.13e-11	0.558589	0.829	0.642	1.96e-07	2
Expression levels of cluster-specific marker genes in macrophage subtypes.	1.2e-11	0.497771	0.927	0.698	2.08e-07	2
Expression levels of cluster-specific marker genes in macrophage subtypes.	1.24e-11	0.49849	0.935	0.66	2.16e-07	2
Expression levels of cluster-specific marker genes in macrophage subtypes.	1.57e-11	0.665378	0.545	0.27	2.73e-07	2
Expression levels of cluster-specific marker genes in macrophage subtypes.	1.66e-11	0.608618	0.78	0.543	2.89e-07	2
Expression levels of cluster-specific marker genes in macrophage subtypes.	1.85e-11	0.537049	0.699	0.43	3.21e-07	2
Expression levels of cluster-specific marker genes in macrophage subtypes.	2.13e-11	0.538328	1	0.815	3.71e-07	2
Expression levels of cluster-specific marker genes in macrophage subtypes.	2.22e-11	0.466248	0.919	0.658	3.85e-07	2
Expression levels of cluster-specific marker genes in macrophage subtypes.	2.29e-11	0.479382	0.984	0.755	3.98e-07	2
Expression levels of cluster-specific marker genes in macrophage subtypes.	2.3e-11	0.666417	0.724	0.475	4e-07	2
Expression levels of cluster-specific marker genes in macrophage subtypes.	2.35e-11	0.614815	0.862	0.619	4.08e-07	2
Expression levels of cluster-specific marker genes in macrophage subtypes.	2.36e-11	0.44398	0.732	0.473	4.1e-07	2
Expression levels of cluster-specific marker genes in macrophage subtypes.	2.41e-11	0.519771	0.789	0.595	4.19e-07	2
Expression levels of cluster-specific marker genes in macrophage subtypes.	2.52e-11	0.428731	0.959	0.764	4.39e-07	2
Expression levels of cluster-specific marker genes in macrophage subtypes.	2.65e-11	0.760711	0.837	0.595	4.6e-07	2
Expression levels of cluster-specific marker genes in macrophage subtypes.	2.69e-11	0.42903	0.862	0.662	4.67e-07	2
Expression levels of cluster-specific marker genes in macrophage subtypes.	2.76e-11	0.289749	0.943	0.73	4.8e-07	2
Expression levels of cluster-specific marker genes in macrophage subtypes.	2.81e-11	0.713264	0.927	0.678	4.89e-07	2
Expression levels of cluster-specific marker genes in macrophage subtypes.	3.18e-11	0.651672	0.65	0.403	5.52e-07	2
Expression levels of cluster-specific marker genes in macrophage subtypes.	4.11e-11	0.667494	0.724	0.444	7.15e-07	2
Expression levels of cluster-specific marker genes in macrophage subtypes.	4.35e-11	0.669378	0.886	0.633	7.56e-07	2
Expression levels of cluster-specific marker genes in macrophage subtypes.	4.43e-11	0.540966	0.846	0.669	7.7e-07	2
Expression levels of cluster-specific marker genes in macrophage subtypes.	4.52e-11	0.538658	0.772	0.565	7.86e-07	2
Expression levels of cluster-specific marker genes in macrophage subtypes.	4.53e-11	0.406372	0.748	0.552	7.87e-07	2
Expression levels of cluster-specific marker genes in macrophage subtypes.	4.68e-11	0.660216	0.528	0.282	8.13e-07	2
Expression levels of cluster-specific marker genes in macrophage subtypes.	4.88e-11	0.471533	0.878	0.664	8.48e-07	2
Expression levels of cluster-specific marker genes in macrophage subtypes.	5.35e-11	0.712359	0.65	0.421	9.3e-07	2
Expression levels of cluster-specific marker genes in macrophage subtypes.	5.37e-11	0.462518	0.87	0.678	9.34e-07	2
Expression levels of cluster-specific marker genes in macrophage subtypes.	5.6e-11	0.562159	0.78	0.565	9.74e-07	2
Expression levels of cluster-specific marker genes in macrophage subtypes.	6.74e-11	0.473003	0.764	0.55	1.17e-06	2
Expression levels of cluster-specific marker genes in macrophage subtypes.	6.81e-11	0.540231	0.854	0.617	1.18e-06	2
Expression levels of cluster-specific marker genes in macrophage subtypes.	7.03e-11	0.507568	0.358	0.122	1.22e-06	2
Expression levels of cluster-specific marker genes in macrophage subtypes.	7.95e-11	0.711707	0.585	0.358	1.38e-06	2
Expression levels of cluster-specific marker genes in macrophage subtypes.	9.06e-11	0.393949	0.911	0.727	1.58e-06	2
Expression levels of cluster-specific marker genes in macrophage subtypes.	9.24e-11	1.73226	0.707	0.462	1.61e-06	2
Expression levels of cluster-specific marker genes in macrophage subtypes.	1e-10	0.37821	0.837	0.604	1.74e-06	2
Expression levels of cluster-specific marker genes in macrophage subtypes.	1.03e-10	0.617297	0.699	0.491	1.8e-06	2
Expression levels of cluster-specific marker genes in macrophage subtypes.	1.06e-10	0.526811	0.764	0.448	1.85e-06	2
Expression levels of cluster-specific marker genes in macrophage subtypes.	1.1e-10	0.578782	0.748	0.509	1.91e-06	2
Expression levels of cluster-specific marker genes in macrophage subtypes.	1.22e-10	0.657509	0.837	0.637	2.12e-06	2
Expression levels of cluster-specific marker genes in macrophage subtypes.	1.38e-10	0.443812	0.626	0.356	2.41e-06	2
Expression levels of cluster-specific marker genes in macrophage subtypes.	1.44e-10	0.366874	0.829	0.644	2.51e-06	2
Expression levels of cluster-specific marker genes in macrophage subtypes.	1.46e-10	1.33283	0.634	0.414	2.55e-06	2
Expression levels of cluster-specific marker genes in macrophage subtypes.	1.58e-10	0.625218	0.789	0.579	2.75e-06	2
Expression levels of cluster-specific marker genes in macrophage subtypes.	1.61e-10	0.562947	0.837	0.626	2.79e-06	2
Expression levels of cluster-specific marker genes in macrophage subtypes.	1.61e-10	0.715334	0.683	0.464	2.8e-06	2
Expression levels of cluster-specific marker genes in macrophage subtypes.	1.61e-10	0.583038	0.756	0.541	2.8e-06	2
Expression levels of cluster-specific marker genes in macrophage subtypes.	1.74e-10	0.475008	0.756	0.514	3.03e-06	2
Expression levels of cluster-specific marker genes in macrophage subtypes.	1.85e-10	0.378684	0.935	0.759	3.22e-06	2
Expression levels of cluster-specific marker genes in macrophage subtypes.	2.11e-10	0.795963	0.675	0.435	3.67e-06	2
Expression levels of cluster-specific marker genes in macrophage subtypes.	2.64e-10	0.374393	0.659	0.423	4.59e-06	2
Expression levels of cluster-specific marker genes in macrophage subtypes.	2.76e-10	0.462595	0.846	0.633	4.79e-06	2
Expression levels of cluster-specific marker genes in macrophage subtypes.	2.77e-10	0.533682	0.715	0.507	4.82e-06	2
Expression levels of cluster-specific marker genes in macrophage subtypes.	2.9e-10	0.636751	0.959	0.8	5.05e-06	2
Expression levels of cluster-specific marker genes in macrophage subtypes.	2.96e-10	0.536174	0.285	0.081	5.15e-06	2
Expression levels of cluster-specific marker genes in macrophage subtypes.	3e-10	0.641116	0.764	0.532	5.21e-06	2
Expression levels of cluster-specific marker genes in macrophage subtypes.	3.11e-10	0.568494	0.837	0.658	5.42e-06	2
Expression levels of cluster-specific marker genes in macrophage subtypes.	3.36e-10	0.576341	0.642	0.383	5.85e-06	2
Expression levels of cluster-specific marker genes in macrophage subtypes.	3.5e-10	0.432508	0.618	0.376	6.08e-06	2
Expression levels of cluster-specific marker genes in macrophage subtypes.	4.23e-10	1.10879	0.748	0.577	7.36e-06	2
Expression levels of cluster-specific marker genes in macrophage subtypes.	4.34e-10	0.658596	0.626	0.385	7.54e-06	2
Expression levels of cluster-specific marker genes in macrophage subtypes.	4.64e-10	0.368828	0.748	0.532	8.06e-06	2
Expression levels of cluster-specific marker genes in macrophage subtypes.	4.86e-10	0.792092	0.715	0.529	8.46e-06	2
Expression levels of cluster-specific marker genes in macrophage subtypes.	5.16e-10	0.508451	0.512	0.275	8.97e-06	2
Expression levels of cluster-specific marker genes in macrophage subtypes.	5.33e-10	0.515442	0.829	0.637	9.26e-06	2
Expression levels of cluster-specific marker genes in macrophage subtypes.	5.53e-10	0.68414	0.724	0.5	9.61e-06	2
Expression levels of cluster-specific marker genes in macrophage subtypes.	5.68e-10	0.34117	0.943	0.736	9.88e-06	2
Expression levels of cluster-specific marker genes in macrophage subtypes.	5.9e-10	0.607028	0.724	0.511	1.03e-05	2
Expression levels of cluster-specific marker genes in macrophage subtypes.	6.49e-10	0.77009	0.732	0.486	1.13e-05	2
Expression levels of cluster-specific marker genes in macrophage subtypes.	7.23e-10	0.936755	0.301	0.099	1.26e-05	2
Expression levels of cluster-specific marker genes in macrophage subtypes.	7.29e-10	0.536054	0.854	0.637	1.27e-05	2
Expression levels of cluster-specific marker genes in macrophage subtypes.	7.42e-10	0.395273	0.951	0.739	1.29e-05	2
Expression levels of cluster-specific marker genes in macrophage subtypes.	7.46e-10	0.392573	0.902	0.727	1.3e-05	2
Expression levels of cluster-specific marker genes in macrophage subtypes.	7.63e-10	0.423195	0.959	0.788	1.33e-05	2
Expression levels of cluster-specific marker genes in macrophage subtypes.	7.63e-10	0.526913	0.943	0.703	1.33e-05	2
Expression levels of cluster-specific marker genes in macrophage subtypes.	7.96e-10	0.326656	0.894	0.68	1.38e-05	2
Expression levels of cluster-specific marker genes in macrophage subtypes.	8.01e-10	0.563044	0.626	0.403	1.39e-05	2
Expression levels of cluster-specific marker genes in macrophage subtypes.	8.6e-10	0.410821	0.927	0.703	1.5e-05	2
Expression levels of cluster-specific marker genes in macrophage subtypes.	9.88e-10	0.501761	0.667	0.507	1.72e-05	2
Expression levels of cluster-specific marker genes in macrophage subtypes.	1.07e-09	0.715726	0.984	0.759	1.87e-05	2
Expression levels of cluster-specific marker genes in macrophage subtypes.	1.15e-09	0.420748	0.959	0.73	2e-05	2
Expression levels of cluster-specific marker genes in macrophage subtypes.	1.16e-09	0.443785	0.829	0.613	2.01e-05	2
Expression levels of cluster-specific marker genes in macrophage subtypes.	1.16e-09	0.470181	0.797	0.579	2.01e-05	2
Expression levels of cluster-specific marker genes in macrophage subtypes.	1.19e-09	0.720138	0.52	0.282	2.06e-05	2
Expression levels of cluster-specific marker genes in macrophage subtypes.	1.19e-09	0.304541	0.846	0.538	2.07e-05	2
Expression levels of cluster-specific marker genes in macrophage subtypes.	1.32e-09	0.469738	0.585	0.331	2.29e-05	2
Expression levels of cluster-specific marker genes in macrophage subtypes.	1.34e-09	0.740588	0.431	0.187	2.33e-05	2
Expression levels of cluster-specific marker genes in macrophage subtypes.	1.42e-09	0.334282	0.862	0.694	2.46e-05	2
Expression levels of cluster-specific marker genes in macrophage subtypes.	1.43e-09	0.606451	0.691	0.41	2.48e-05	2
Expression levels of cluster-specific marker genes in macrophage subtypes.	1.46e-09	0.559121	0.878	0.682	2.53e-05	2
Expression levels of cluster-specific marker genes in macrophage subtypes.	1.88e-09	0.419389	0.626	0.408	3.26e-05	2
Expression levels of cluster-specific marker genes in macrophage subtypes.	1.9e-09	0.713958	0.65	0.477	3.31e-05	2
Expression levels of cluster-specific marker genes in macrophage subtypes.	2e-09	0.549537	0.472	0.245	3.48e-05	2
Expression levels of cluster-specific marker genes in macrophage subtypes.	2.05e-09	0.533193	0.764	0.586	3.57e-05	2
Expression levels of cluster-specific marker genes in macrophage subtypes.	2.05e-09	0.484072	0.902	0.671	3.57e-05	2
Expression levels of cluster-specific marker genes in macrophage subtypes.	2.06e-09	0.558556	0.846	0.606	3.59e-05	2
Expression levels of cluster-specific marker genes in macrophage subtypes.	2.13e-09	0.558894	0.976	0.831	3.7e-05	2
Expression levels of cluster-specific marker genes in macrophage subtypes.	2.29e-09	0.401489	0.65	0.423	3.98e-05	2
Expression levels of cluster-specific marker genes in macrophage subtypes.	2.3e-09	0.447142	0.797	0.583	4.01e-05	2
Expression levels of cluster-specific marker genes in macrophage subtypes.	2.36e-09	0.396125	0.894	0.703	4.1e-05	2
Expression levels of cluster-specific marker genes in macrophage subtypes.	2.89e-09	0.642312	1	0.899	5.02e-05	2
Expression levels of cluster-specific marker genes in macrophage subtypes.	2.92e-09	0.497055	0.951	0.705	5.07e-05	2
Expression levels of cluster-specific marker genes in macrophage subtypes.	3.23e-09	0.433307	0.593	0.381	5.61e-05	2
Expression levels of cluster-specific marker genes in macrophage subtypes.	3.23e-09	0.386278	0.472	0.241	5.62e-05	2
Expression levels of cluster-specific marker genes in macrophage subtypes.	3.28e-09	0.531644	0.959	0.739	5.7e-05	2
Expression levels of cluster-specific marker genes in macrophage subtypes.	3.3e-09	0.480331	0.715	0.52	5.74e-05	2
Expression levels of cluster-specific marker genes in macrophage subtypes.	3.34e-09	0.311769	0.602	0.36	5.82e-05	2
Expression levels of cluster-specific marker genes in macrophage subtypes.	3.48e-09	0.530424	0.911	0.68	6.06e-05	2
Expression levels of cluster-specific marker genes in macrophage subtypes.	3.62e-09	0.360147	0.878	0.709	6.29e-05	2
Expression levels of cluster-specific marker genes in macrophage subtypes.	3.66e-09	0.368084	0.756	0.525	6.37e-05	2
Expression levels of cluster-specific marker genes in macrophage subtypes.	3.67e-09	0.90956	0.374	0.149	6.38e-05	2
Expression levels of cluster-specific marker genes in macrophage subtypes.	3.68e-09	1.78464	0.846	0.718	6.39e-05	2
Expression levels of cluster-specific marker genes in macrophage subtypes.	3.78e-09	0.441816	0.626	0.421	6.58e-05	2
Expression levels of cluster-specific marker genes in macrophage subtypes.	3.81e-09	0.577396	0.772	0.604	6.62e-05	2
Expression levels of cluster-specific marker genes in macrophage subtypes.	3.81e-09	0.267368	0.886	0.673	6.62e-05	2
Expression levels of cluster-specific marker genes in macrophage subtypes.	4.35e-09	0.550321	0.593	0.329	7.56e-05	2
Expression levels of cluster-specific marker genes in macrophage subtypes.	4.37e-09	0.572708	0.967	0.768	7.6e-05	2
Expression levels of cluster-specific marker genes in macrophage subtypes.	4.74e-09	0.539971	0.87	0.655	8.23e-05	2
Expression levels of cluster-specific marker genes in macrophage subtypes.	5.04e-09	0.454961	0.789	0.606	8.77e-05	2
Expression levels of cluster-specific marker genes in macrophage subtypes.	5.61e-09	0.584491	0.911	0.626	9.76e-05	2
Expression levels of cluster-specific marker genes in macrophage subtypes.	5.81e-09	0.497304	0.675	0.489	0.000101042	2
Expression levels of cluster-specific marker genes in macrophage subtypes.	6.14e-09	0.818027	0.992	0.806	0.000106758	2
Expression levels of cluster-specific marker genes in macrophage subtypes.	6.38e-09	0.324775	0.707	0.518	0.000110933	2
Expression levels of cluster-specific marker genes in macrophage subtypes.	7.22e-09	0.554076	0.683	0.507	0.000125624	2
Expression levels of cluster-specific marker genes in macrophage subtypes.	7.34e-09	0.745311	0.528	0.302	0.000127623	2
Expression levels of cluster-specific marker genes in macrophage subtypes.	7.47e-09	0.46951	0.691	0.491	0.000129892	2
Expression levels of cluster-specific marker genes in macrophage subtypes.	7.76e-09	0.480533	0.967	0.757	0.000134853	2
Expression levels of cluster-specific marker genes in macrophage subtypes.	8.17e-09	0.618855	0.659	0.459	0.000141995	2
Expression levels of cluster-specific marker genes in macrophage subtypes.	8.44e-09	0.618539	0.829	0.61	0.000146792	2
Expression levels of cluster-specific marker genes in macrophage subtypes.	8.76e-09	0.787553	0.439	0.214	0.000152256	2
Expression levels of cluster-specific marker genes in macrophage subtypes.	8.85e-09	0.45299	0.813	0.583	0.000153822	2
Expression levels of cluster-specific marker genes in macrophage subtypes.	1e-08	0.652464	0.447	0.225	0.00017389	2
Expression levels of cluster-specific marker genes in macrophage subtypes.	1.1e-08	0.466562	0.715	0.507	0.00019057	2
Expression levels of cluster-specific marker genes in macrophage subtypes.	1.11e-08	0.402777	0.821	0.649	0.000193413	2
Expression levels of cluster-specific marker genes in macrophage subtypes.	1.18e-08	0.492192	0.74	0.57	0.000205774	2
Expression levels of cluster-specific marker genes in macrophage subtypes.	1.21e-08	0.622231	0.992	0.802	0.000209566	2
Expression levels of cluster-specific marker genes in macrophage subtypes.	1.26e-08	0.406788	0.715	0.552	0.000219163	2
Expression levels of cluster-specific marker genes in macrophage subtypes.	1.28e-08	0.445111	0.415	0.196	0.000222285	2
Expression levels of cluster-specific marker genes in macrophage subtypes.	1.38e-08	0.610452	0.593	0.41	0.00024015	2
Expression levels of cluster-specific marker genes in macrophage subtypes.	1.42e-08	0.570802	0.504	0.284	0.000247157	2
Expression levels of cluster-specific marker genes in macrophage subtypes.	1.53e-08	0.48534	0.675	0.459	0.000266318	2
Expression levels of cluster-specific marker genes in macrophage subtypes.	1.57e-08	0.468696	0.333	0.133	0.000272718	2
Expression levels of cluster-specific marker genes in macrophage subtypes.	1.58e-08	0.459211	0.821	0.633	0.000275232	2
Expression levels of cluster-specific marker genes in macrophage subtypes.	1.61e-08	0.655635	0.618	0.414	0.000279413	2
Expression levels of cluster-specific marker genes in macrophage subtypes.	1.62e-08	0.667764	0.642	0.43	0.000281612	2
Expression levels of cluster-specific marker genes in macrophage subtypes.	1.64e-08	0.562563	0.52	0.302	0.00028481	2
Expression levels of cluster-specific marker genes in macrophage subtypes.	1.65e-08	0.483991	0.756	0.559	0.000286548	2
Expression levels of cluster-specific marker genes in macrophage subtypes.	1.65e-08	0.460279	0.74	0.529	0.000287234	2
[truncated: 3,428 more rows]
